# Supplementary material
Source: ML conference proceedings conference paper supplement (https://proceedings.neurips.cc/paper_files/paper/2025/hash/03261886741f1f21f52f2a2d570616a2-Abstract.html)

Average Jaccard Distance

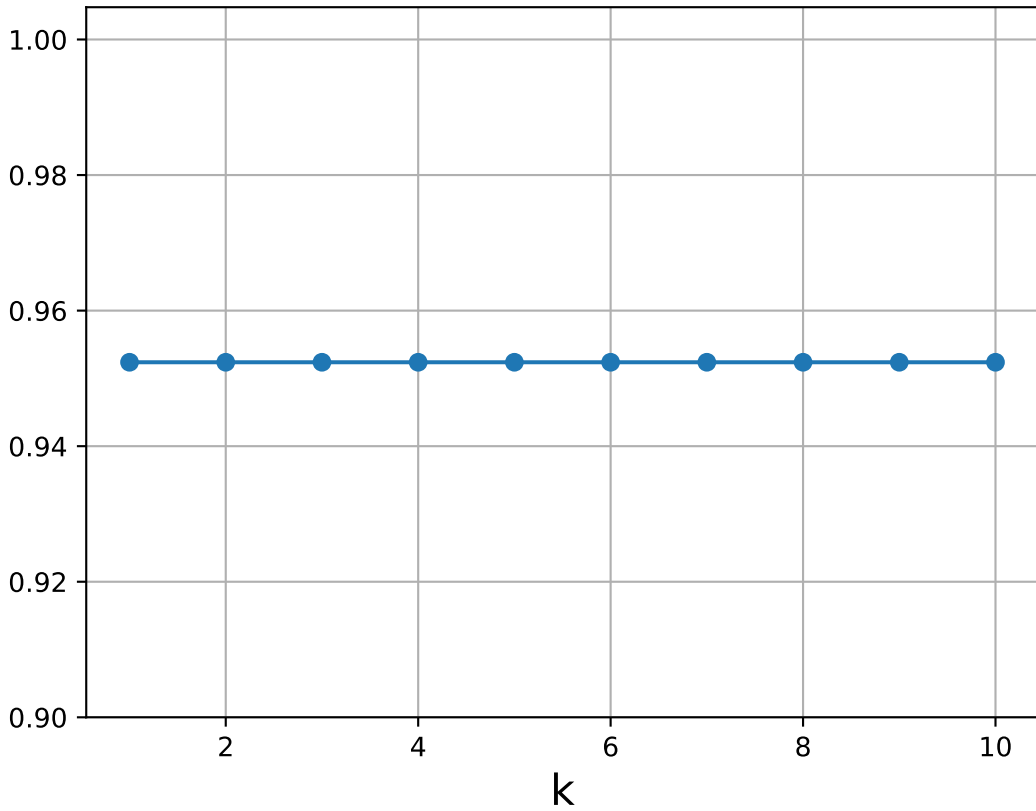

Supplement: Supplementary file 1 [file JD_coverage.pdf › online-two-stage-sub-max-main/online-two-stage-sub-max-experiments/plots/analysis/coverage/JD_coverage.pdf]

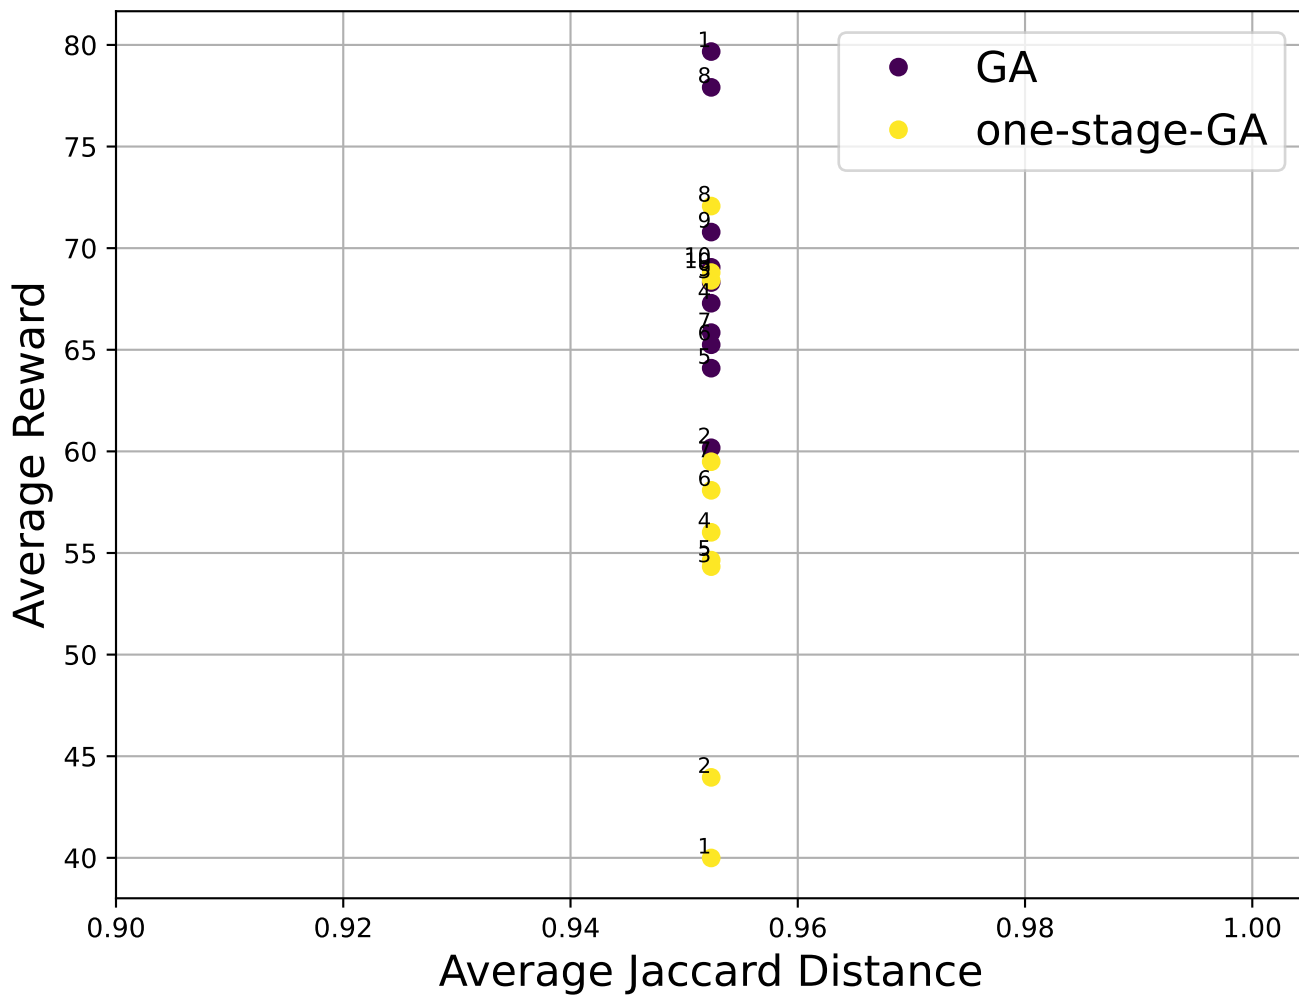

Supplement: Supplementary file 2 [file reward_vs_JD_coverage.pdf › online-two-stage-sub-max-main/online-two-stage-sub-max-experiments/plots/analysis/coverage/reward_vs_JD_coverage.pdf]

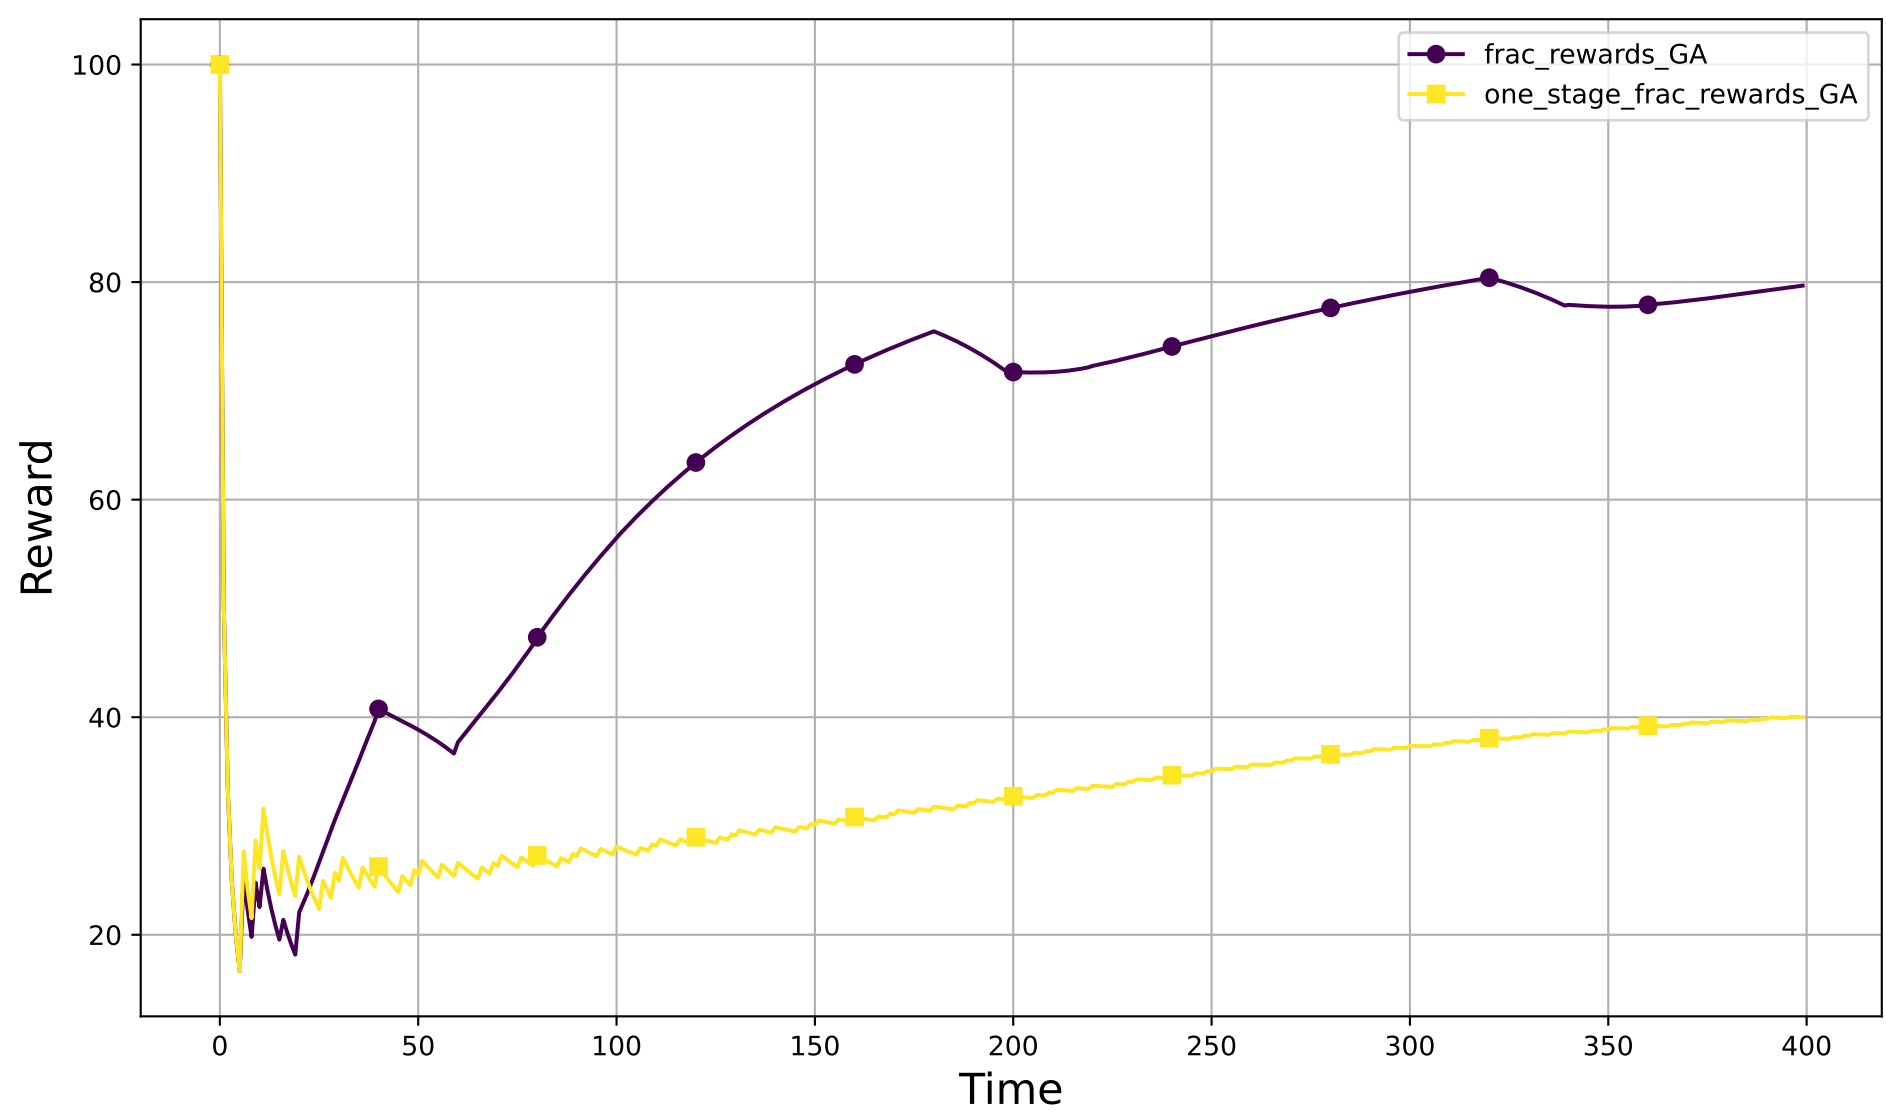

Supplement: Supplementary file 3 [file rewards_k1.pdf › online-two-stage-sub-max-main/online-two-stage-sub-max-experiments/plots/analysis/coverage/rewards_k1.pdf]

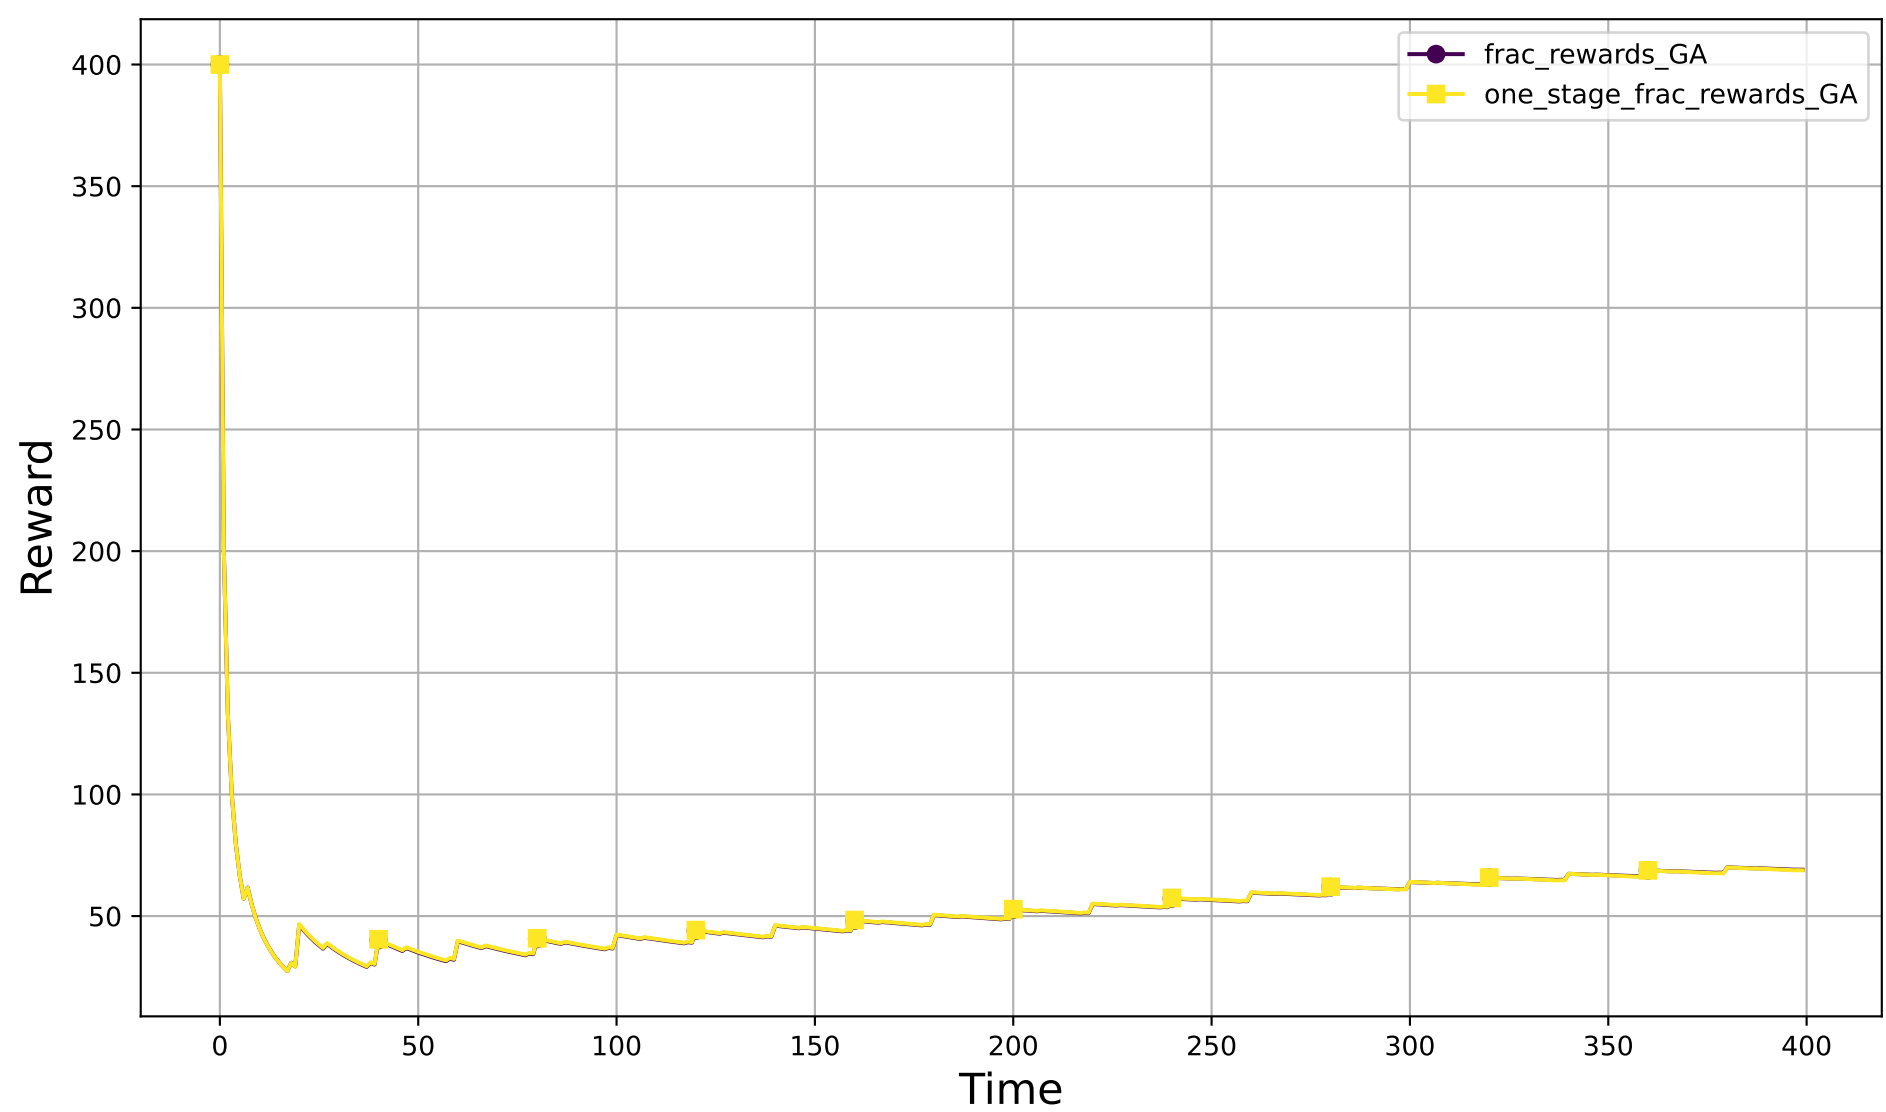

Supplement: Supplementary file 4 [file rewards_k10.pdf › online-two-stage-sub-max-main/online-two-stage-sub-max-experiments/plots/analysis/coverage/rewards_k10.pdf]

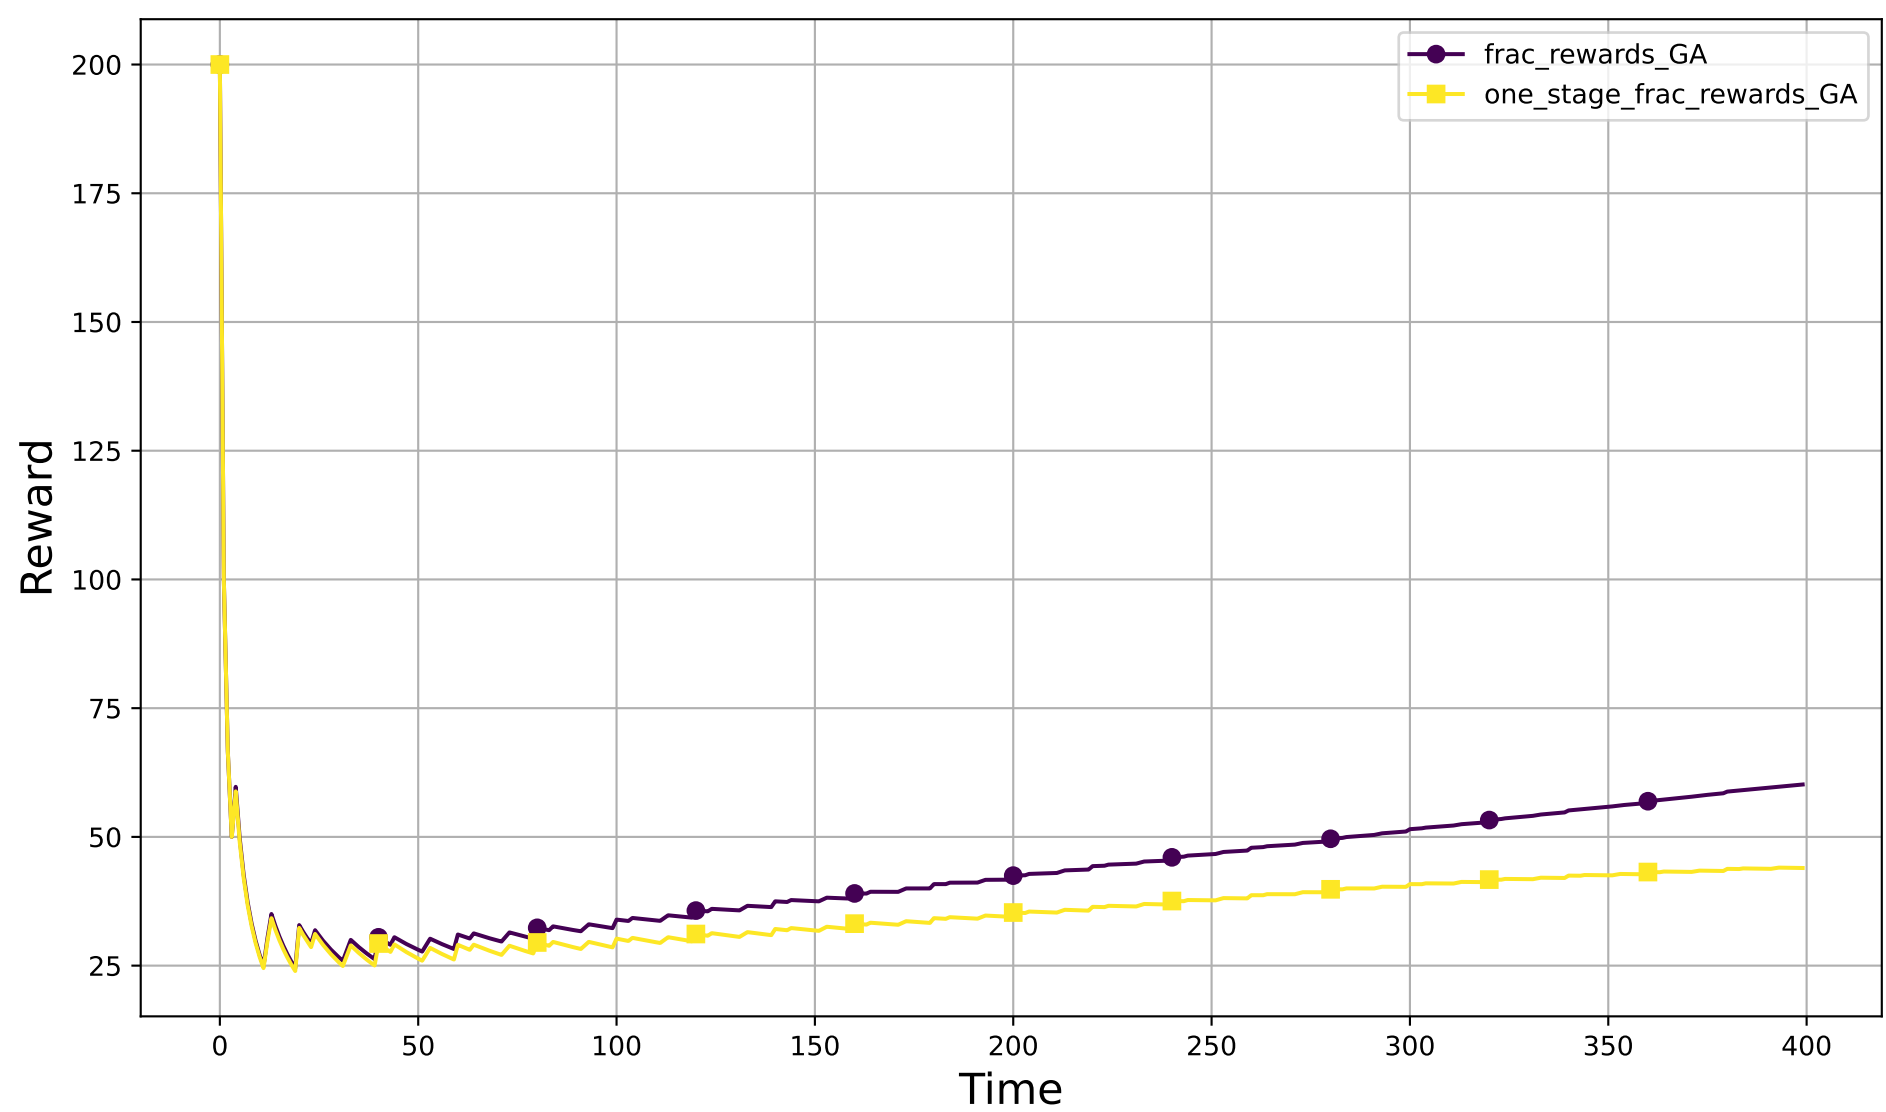

Supplement: Supplementary file 5 [file rewards_k2.pdf › online-two-stage-sub-max-main/online-two-stage-sub-max-experiments/plots/analysis/coverage/rewards_k2.pdf]

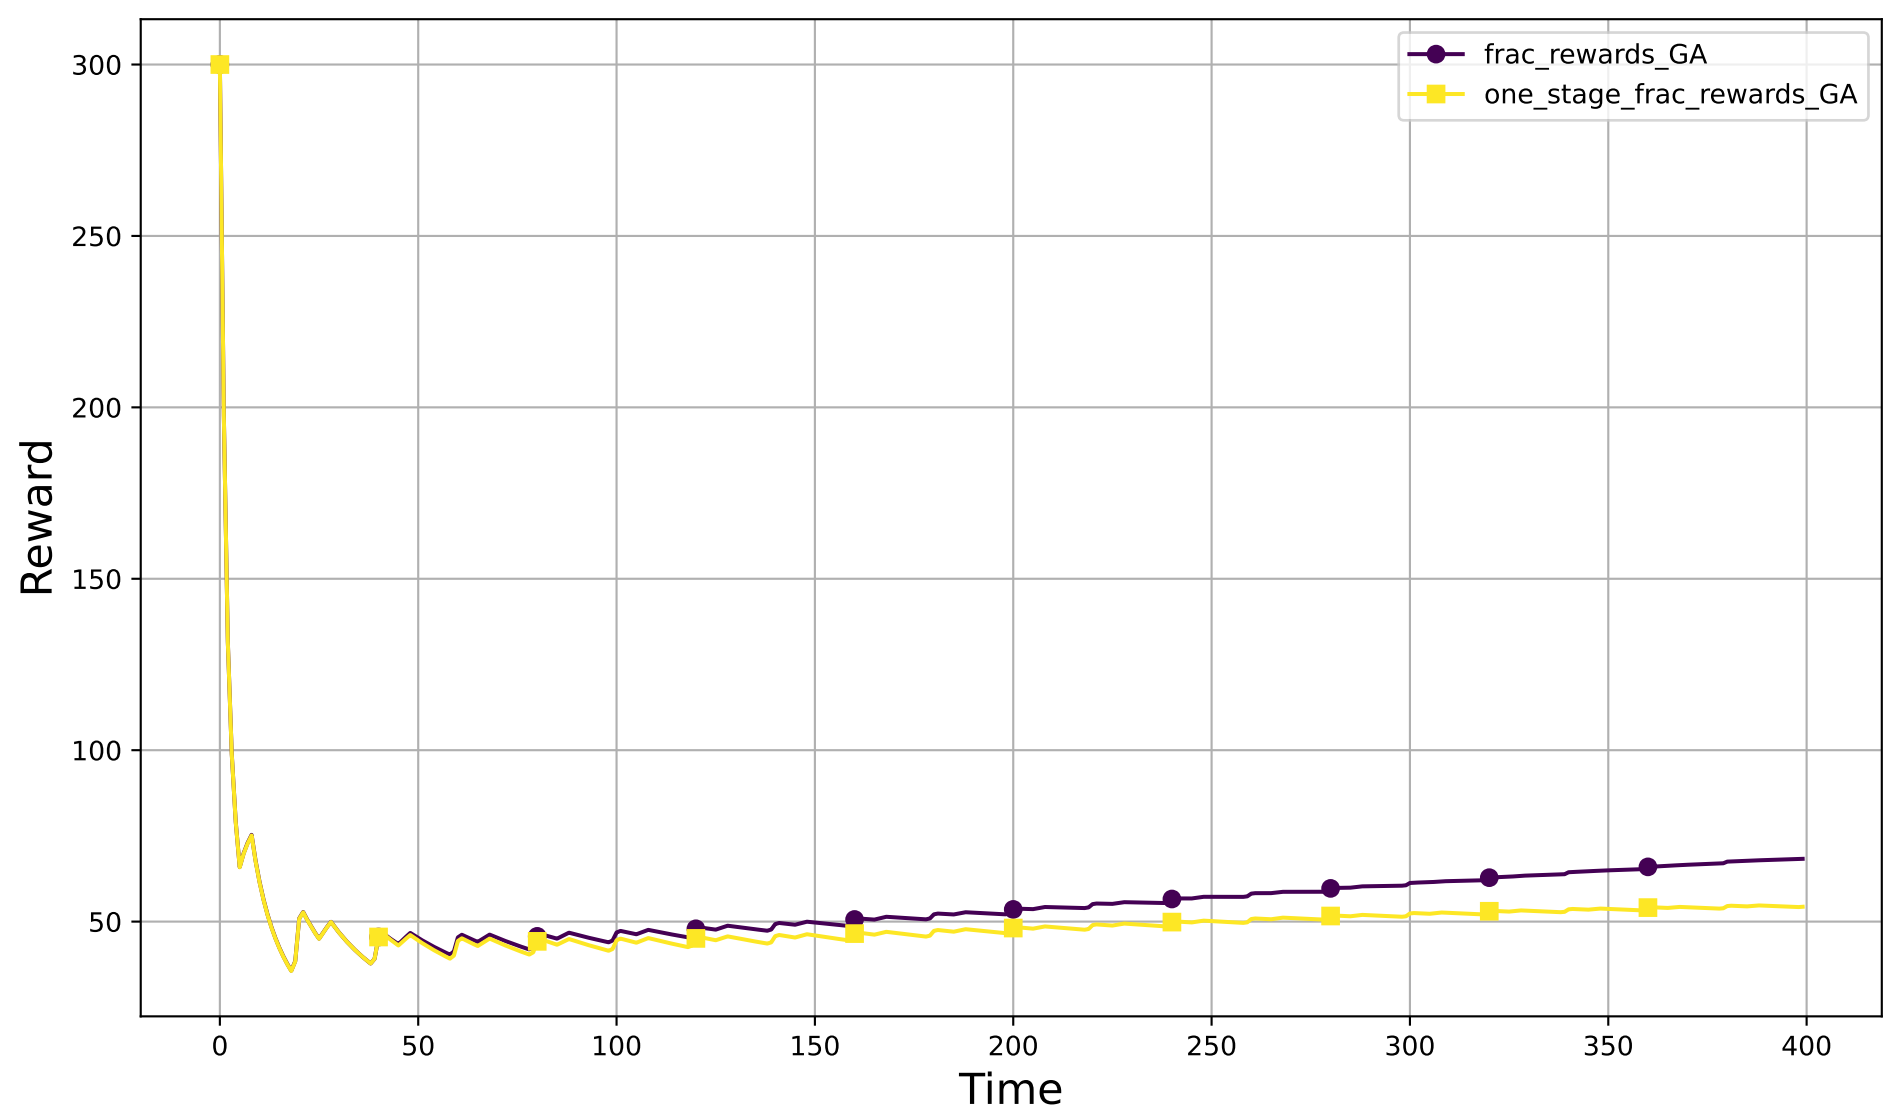

Supplement: Supplementary file 6 [file rewards_k3.pdf › online-two-stage-sub-max-main/online-two-stage-sub-max-experiments/plots/analysis/coverage/rewards_k3.pdf]

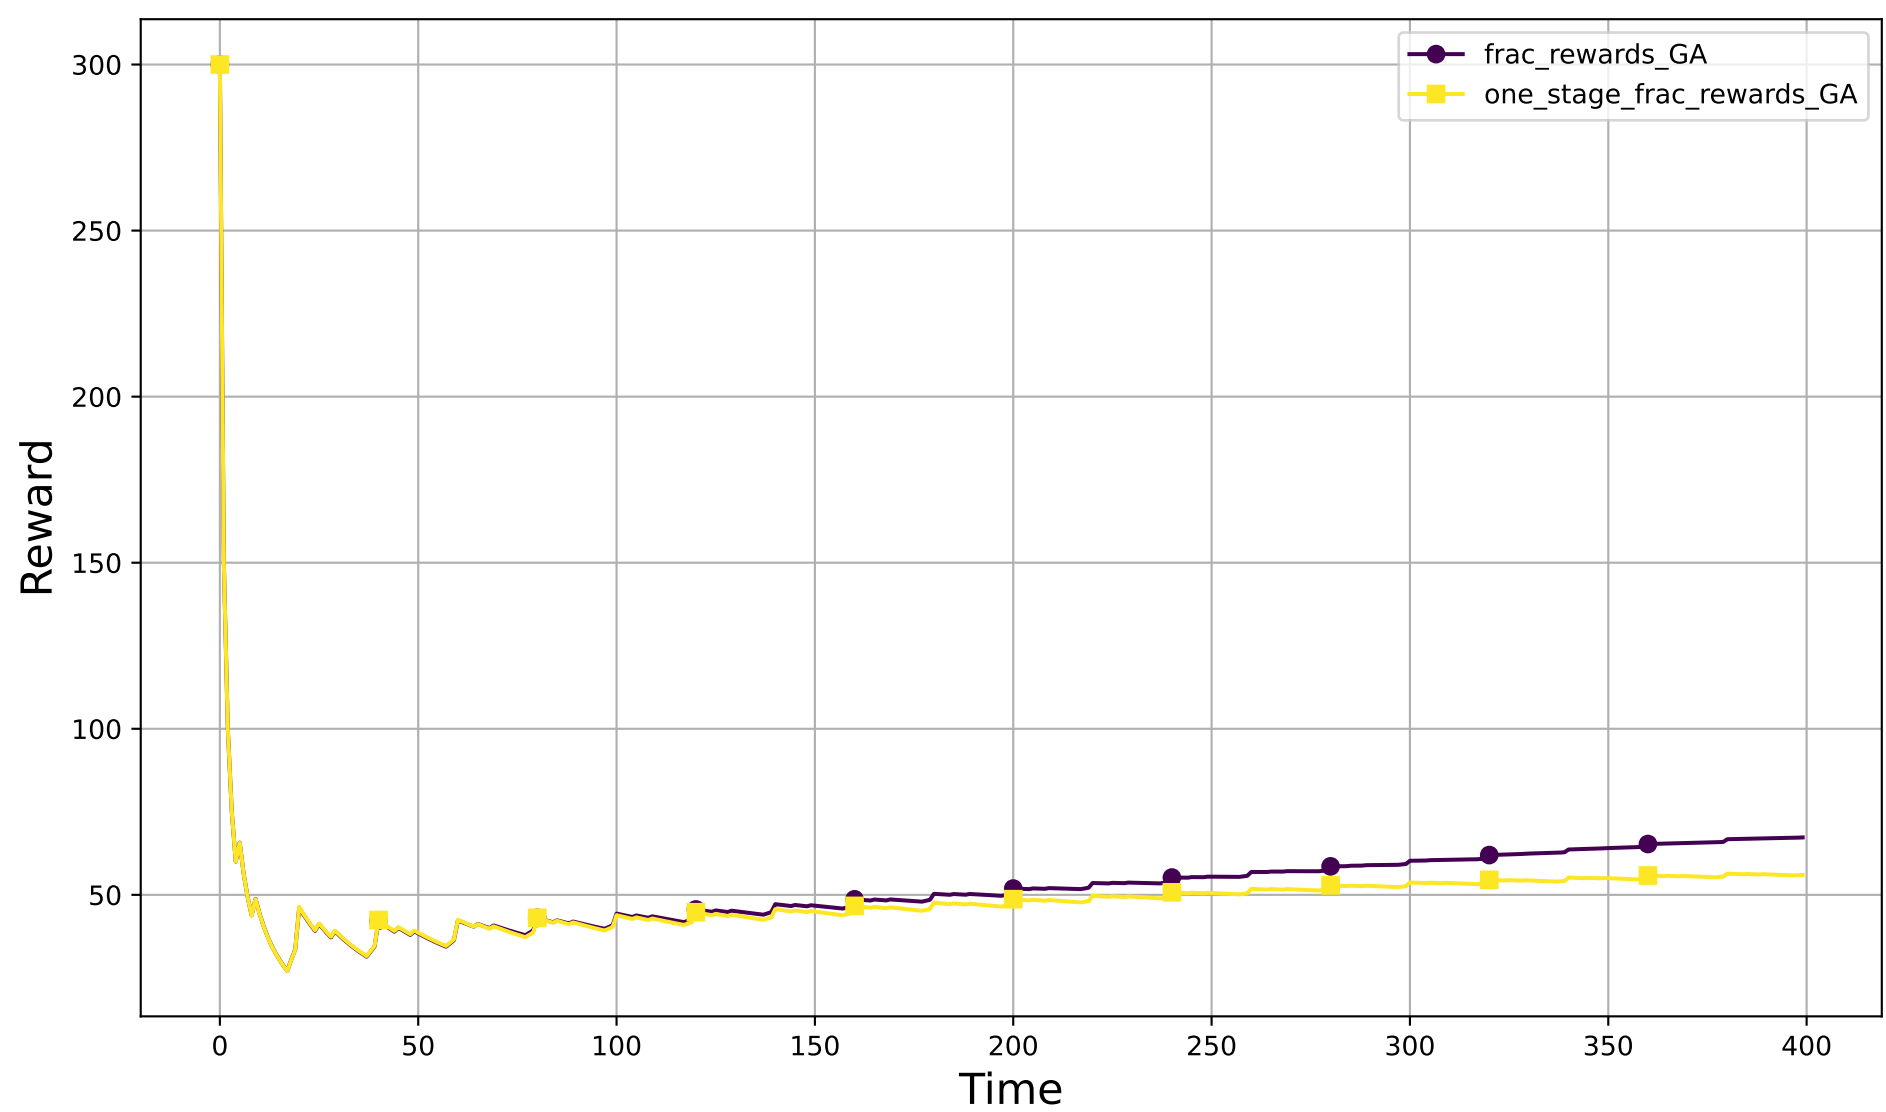

Supplement: Supplementary file 7 [file rewards_k4.pdf › online-two-stage-sub-max-main/online-two-stage-sub-max-experiments/plots/analysis/coverage/rewards_k4.pdf]

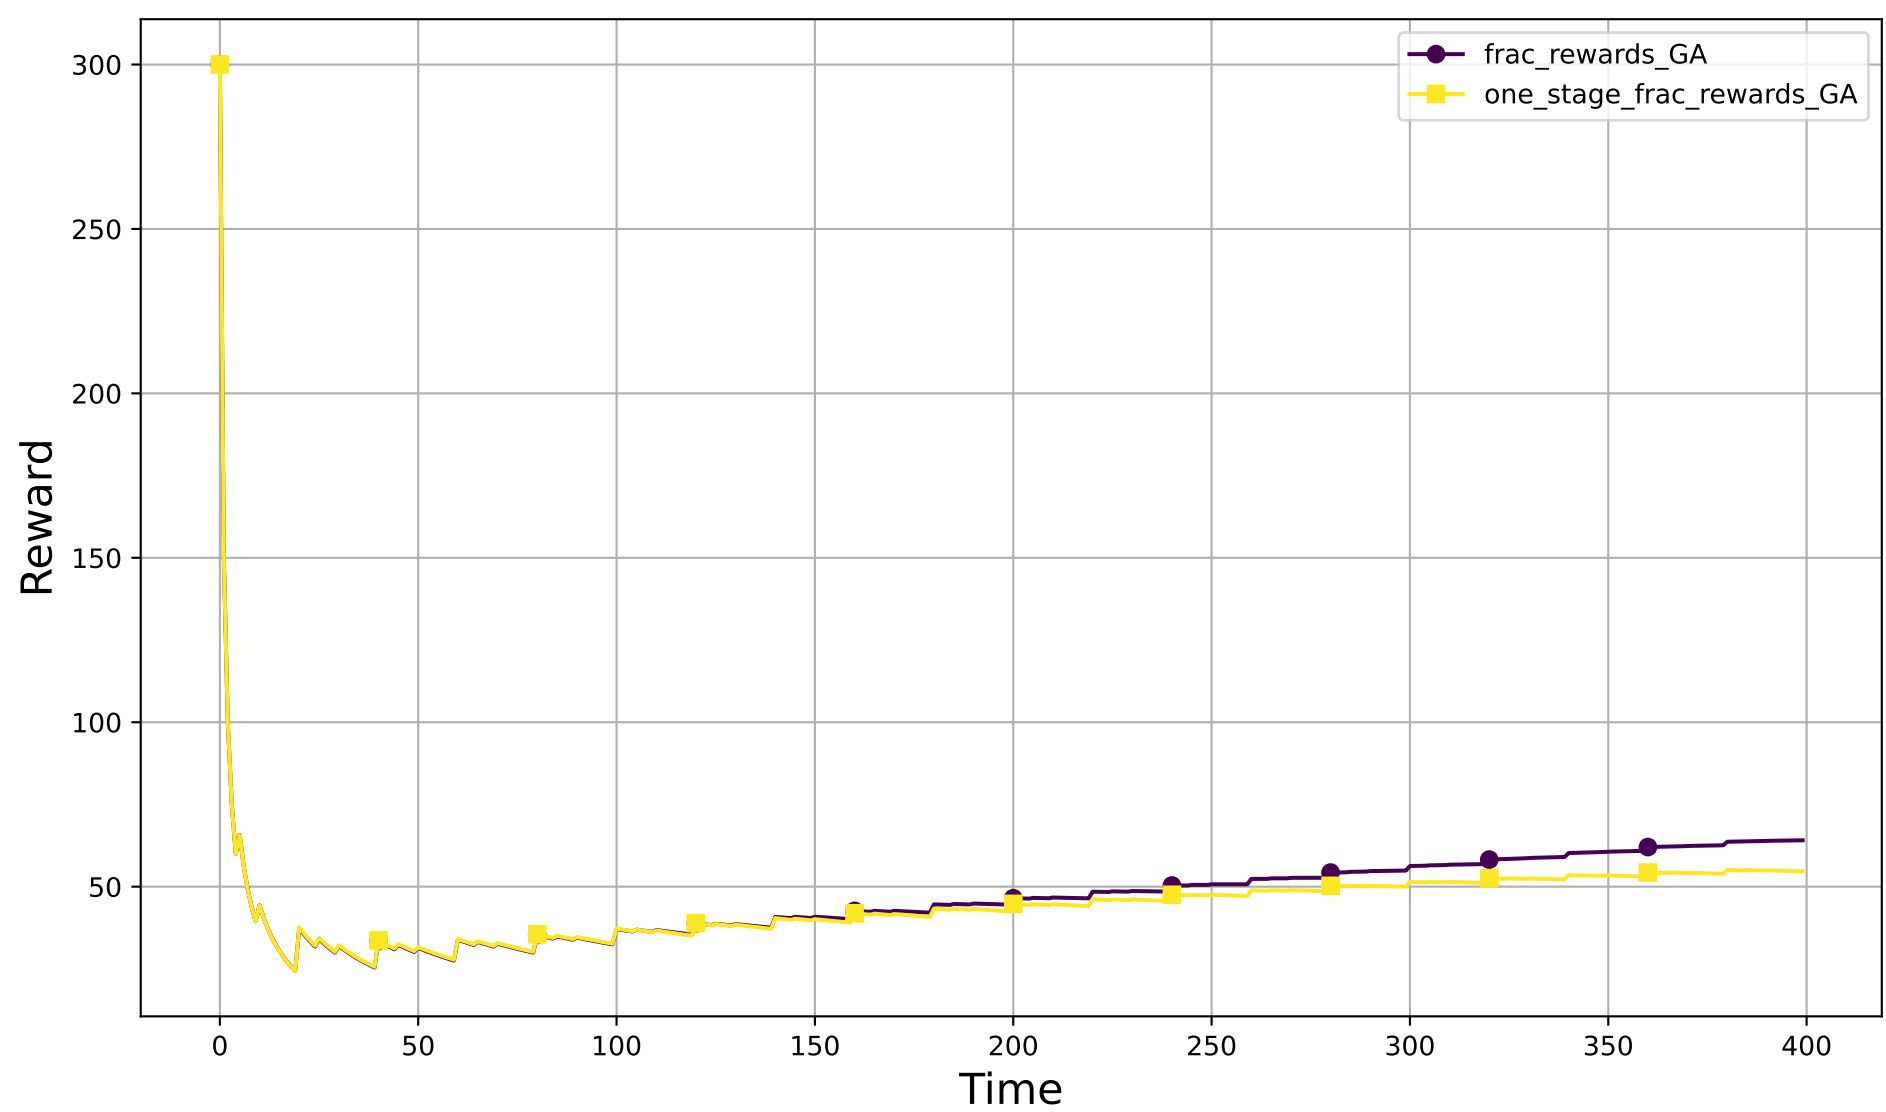

Supplement: Supplementary file 8 [file rewards_k5.pdf › online-two-stage-sub-max-main/online-two-stage-sub-max-experiments/plots/analysis/coverage/rewards_k5.pdf]

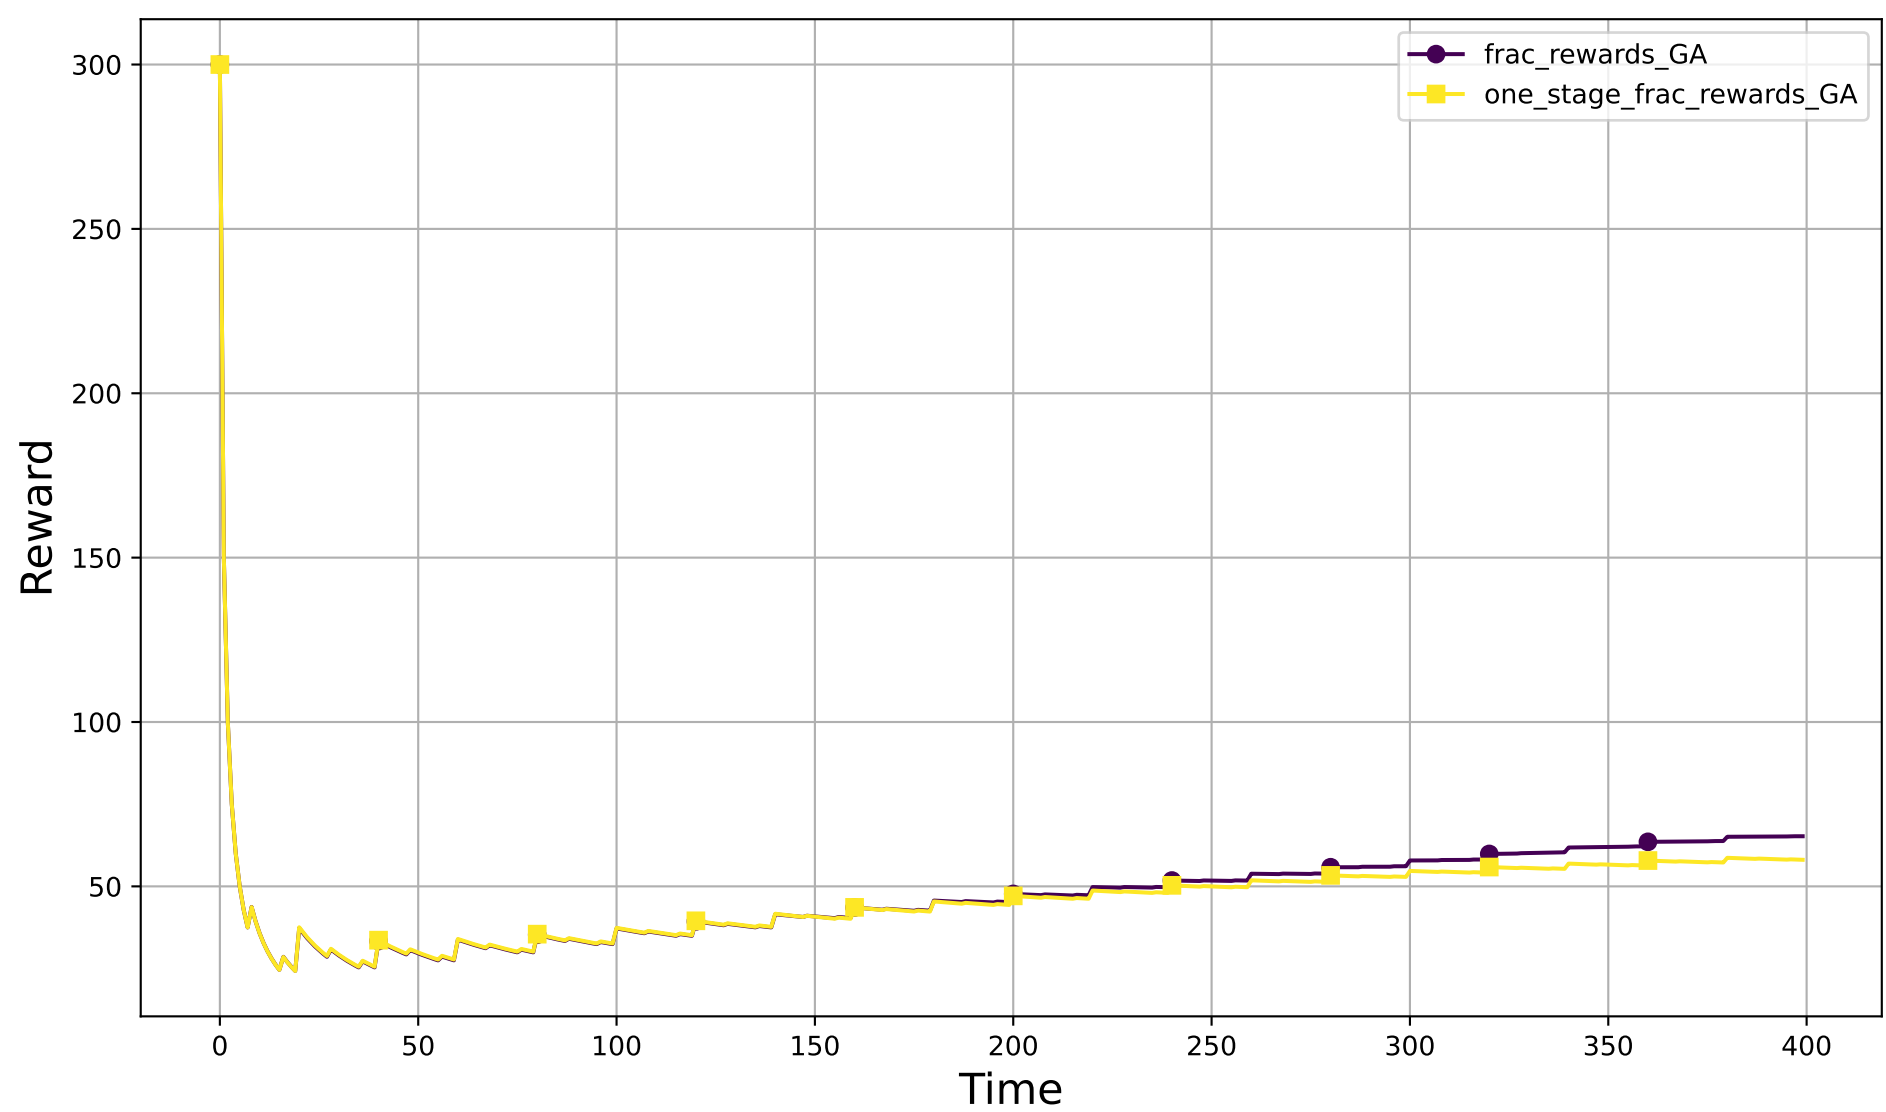

Supplement: Supplementary file 9 [file rewards_k6.pdf › online-two-stage-sub-max-main/online-two-stage-sub-max-experiments/plots/analysis/coverage/rewards_k6.pdf]

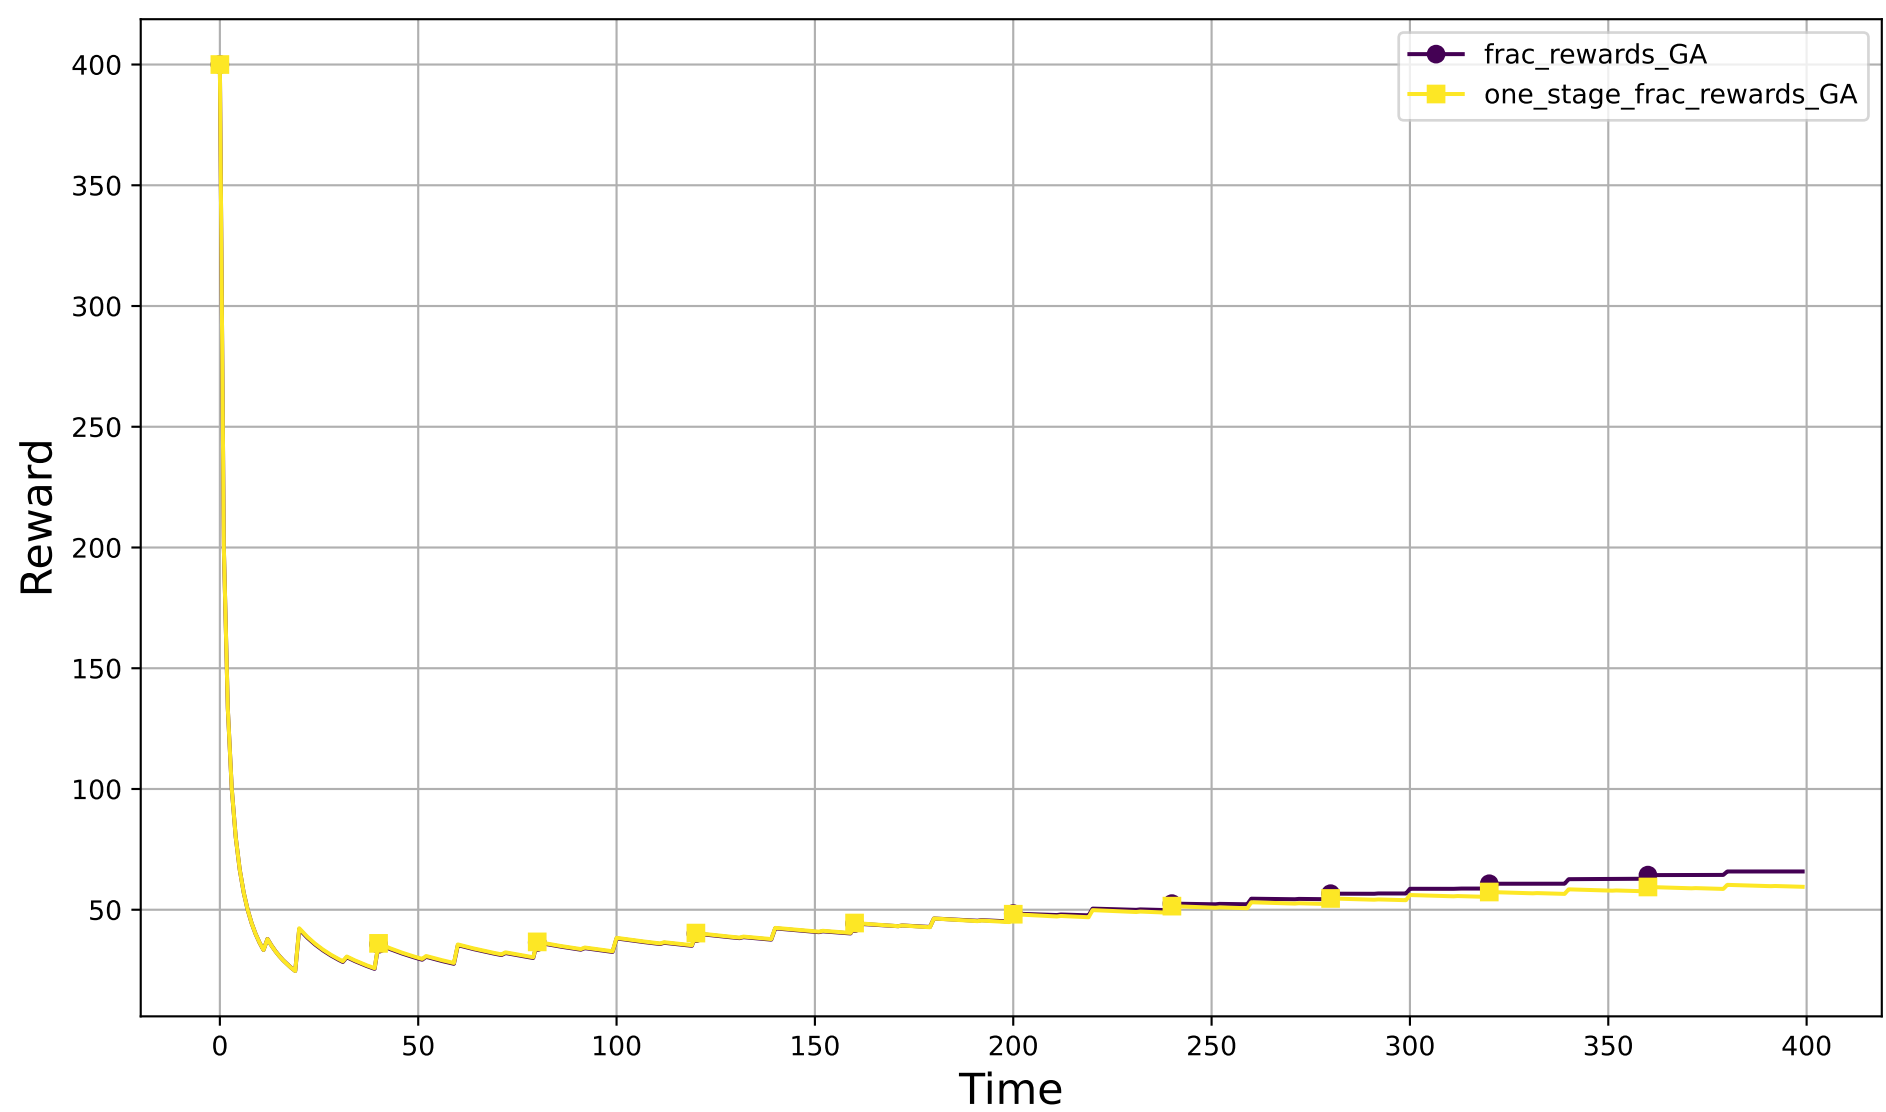

Supplement: Supplementary file 10 [file rewards_k7.pdf › online-two-stage-sub-max-main/online-two-stage-sub-max-experiments/plots/analysis/coverage/rewards_k7.pdf]

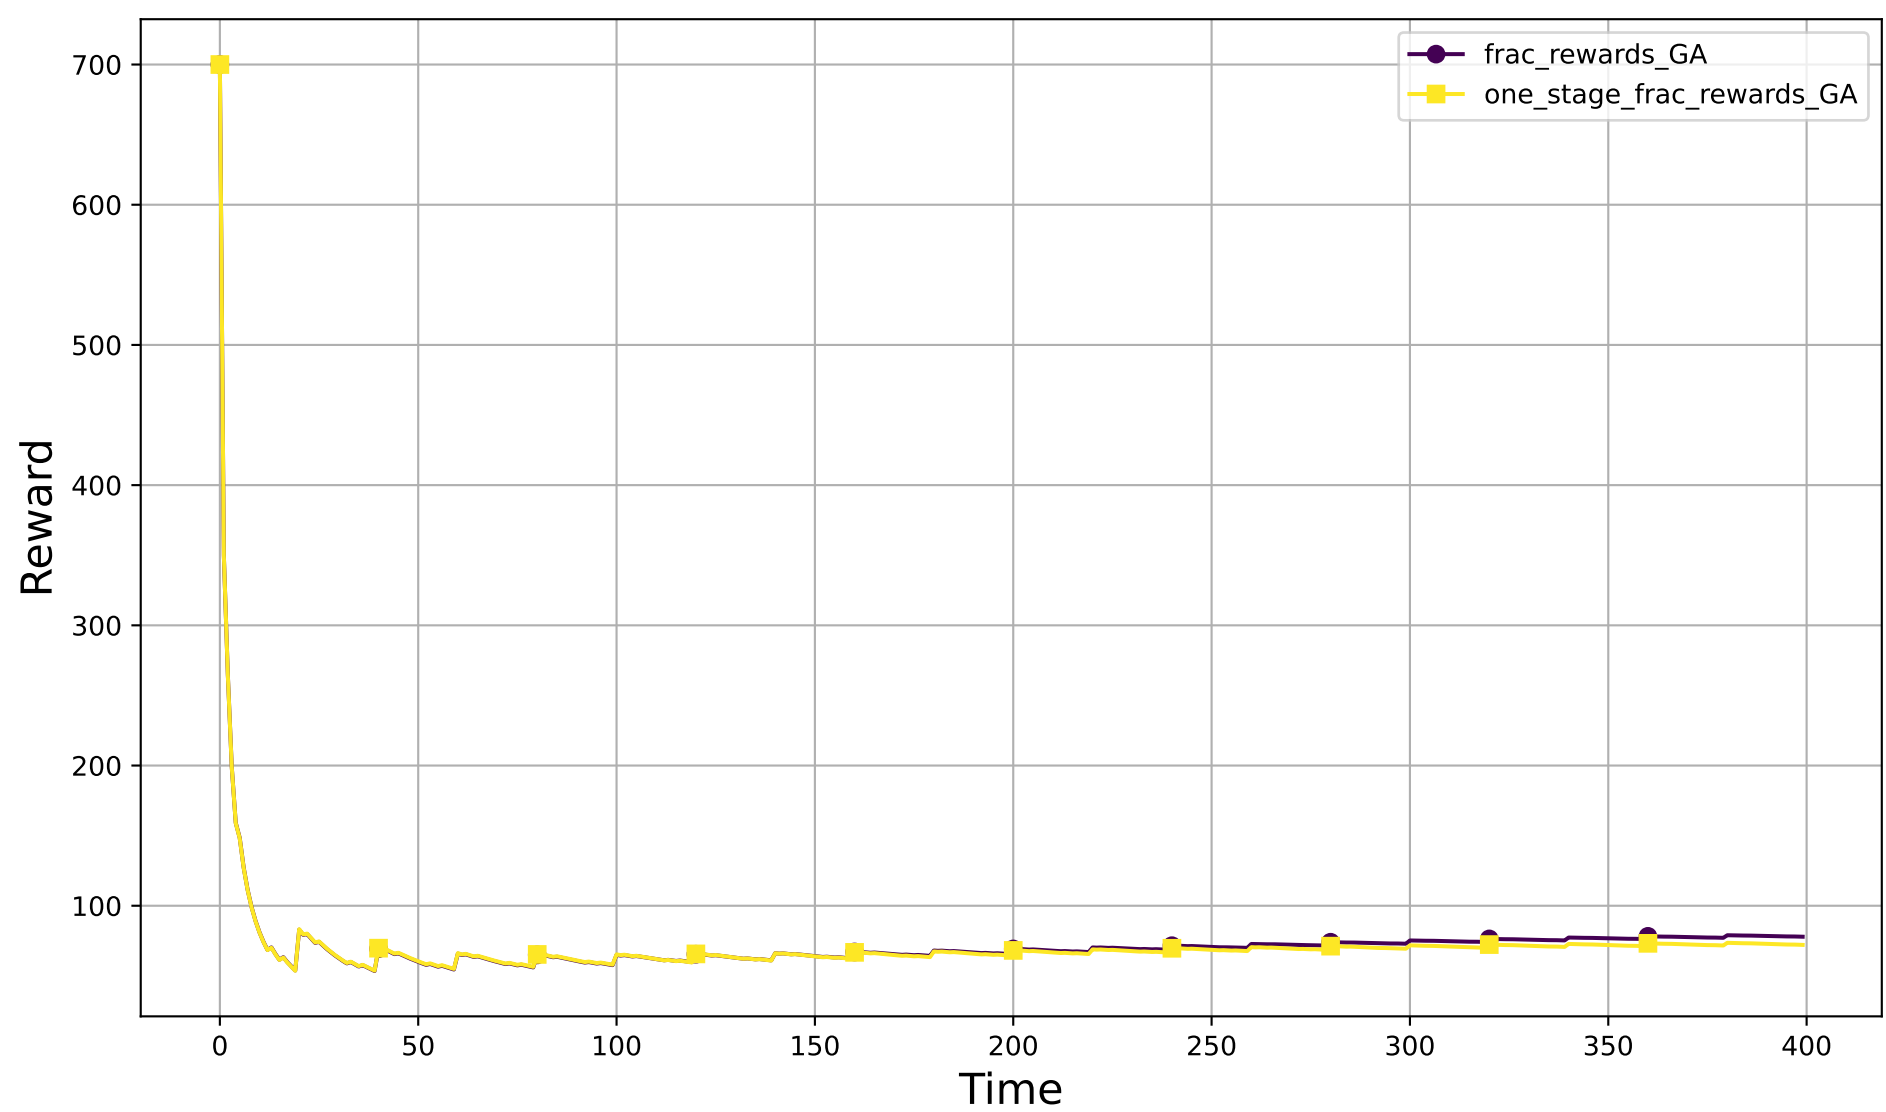

Supplement: Supplementary file 11 [file rewards_k8.pdf › online-two-stage-sub-max-main/online-two-stage-sub-max-experiments/plots/analysis/coverage/rewards_k8.pdf]

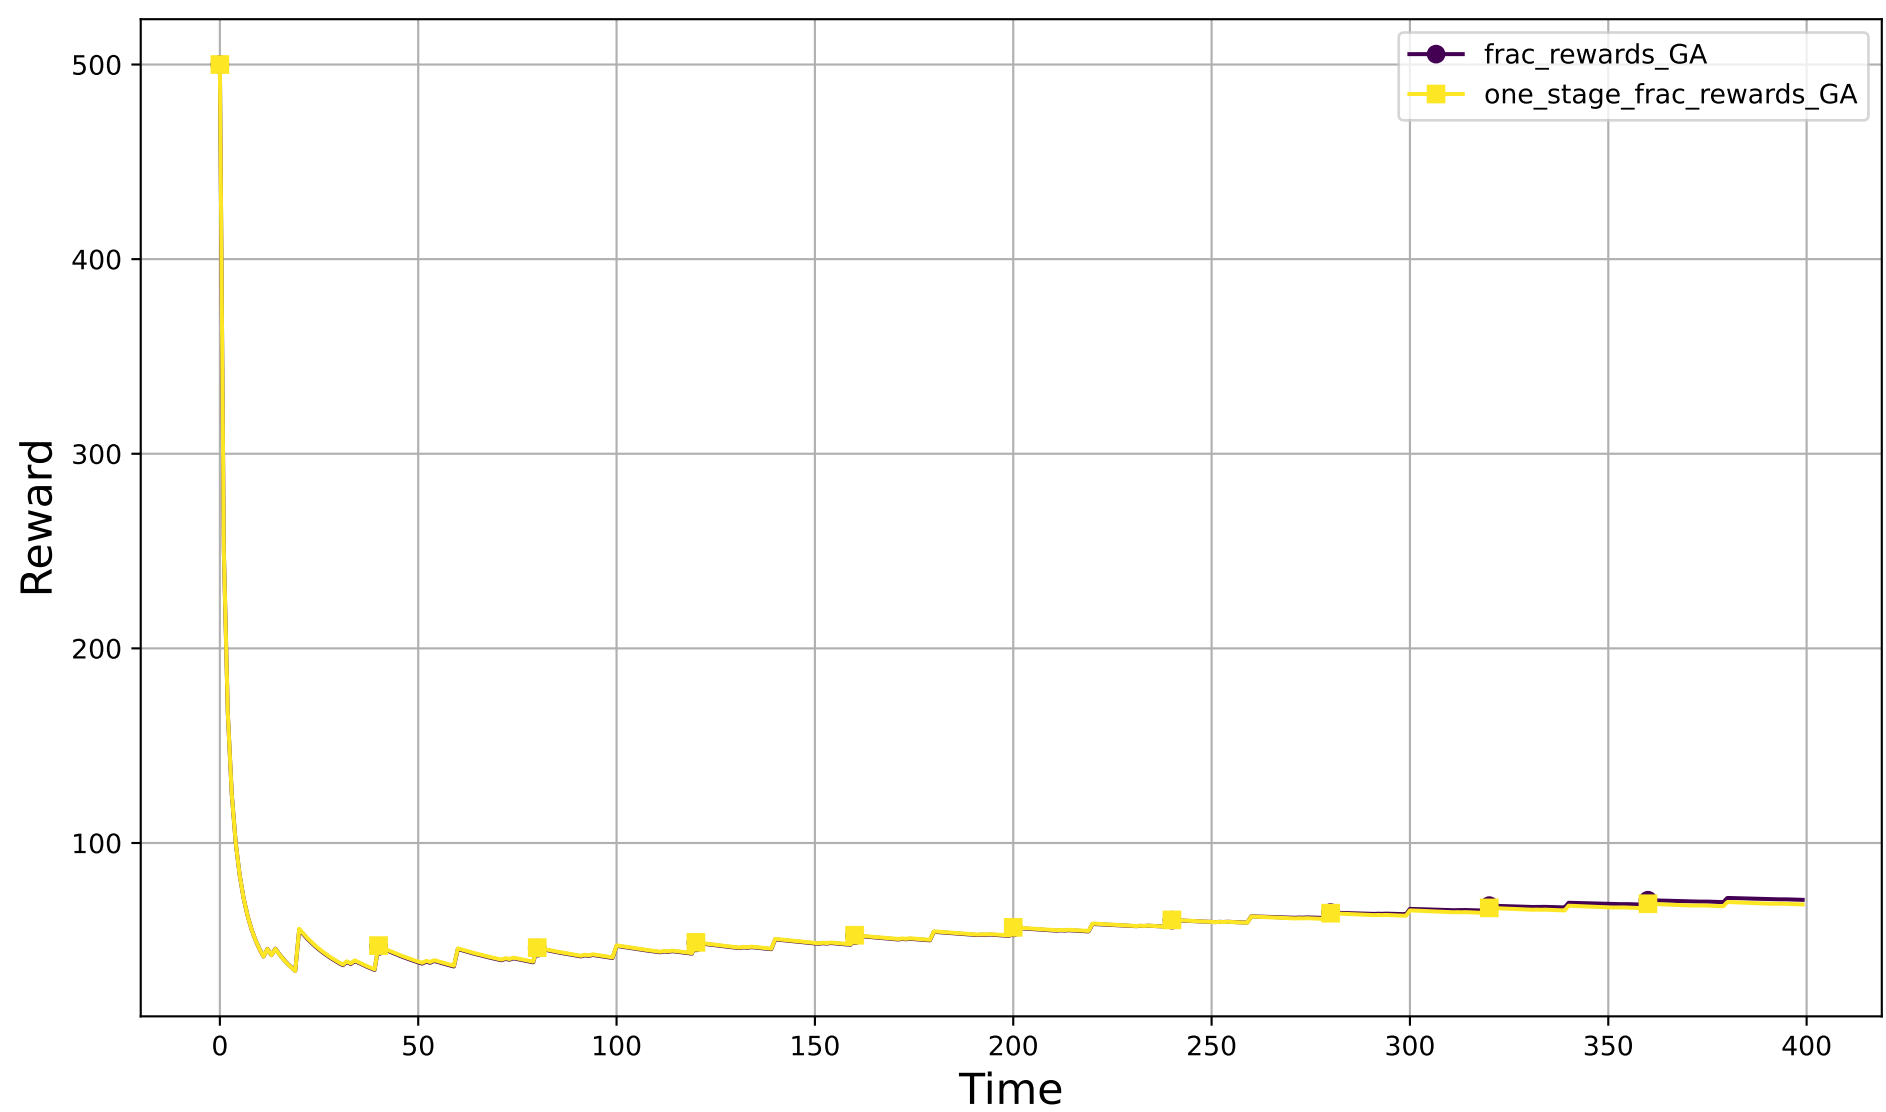

Supplement: Supplementary file 12 [file rewards_k9.pdf › online-two-stage-sub-max-main/online-two-stage-sub-max-experiments/plots/analysis/coverage/rewards_k9.pdf]

Distribution of Potential Weights

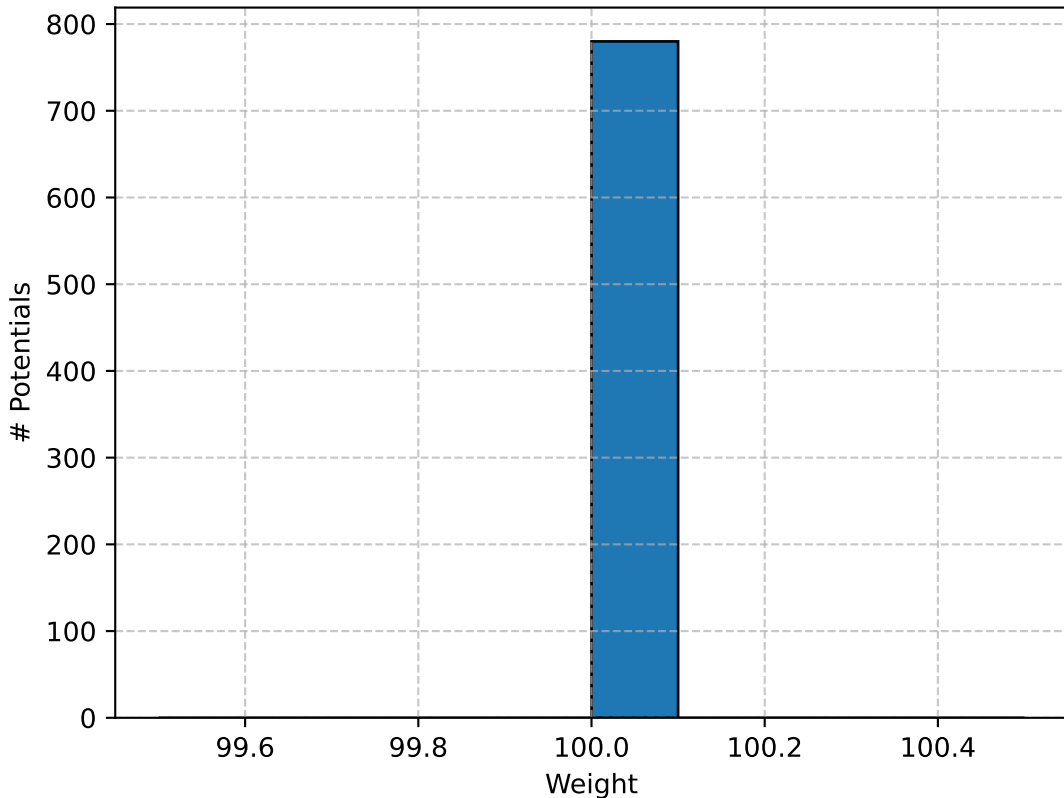

Supplement: Supplementary file 13 [file wtp_weights_dist_coverage.pdf › online-two-stage-sub-max-main/online-two-stage-sub-max-experiments/plots/analysis/coverage/wtp_weights_dist_coverage.pdf]

k vs Average Jaccard Distance of Optimal Solutions

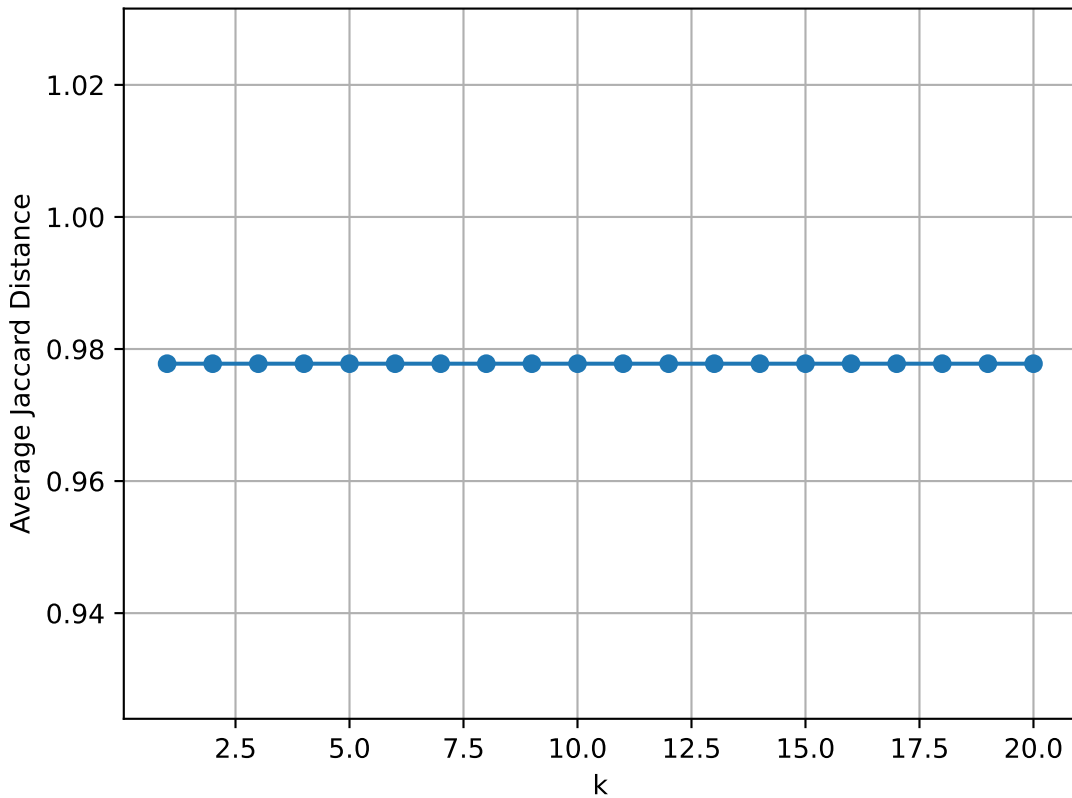

Supplement: Supplementary file 14 [file JD.pdf › online-two-stage-sub-max-main/online-two-stage-sub-max-experiments/plots/analysis/images/JD.pdf]

Average Jaccard Distance

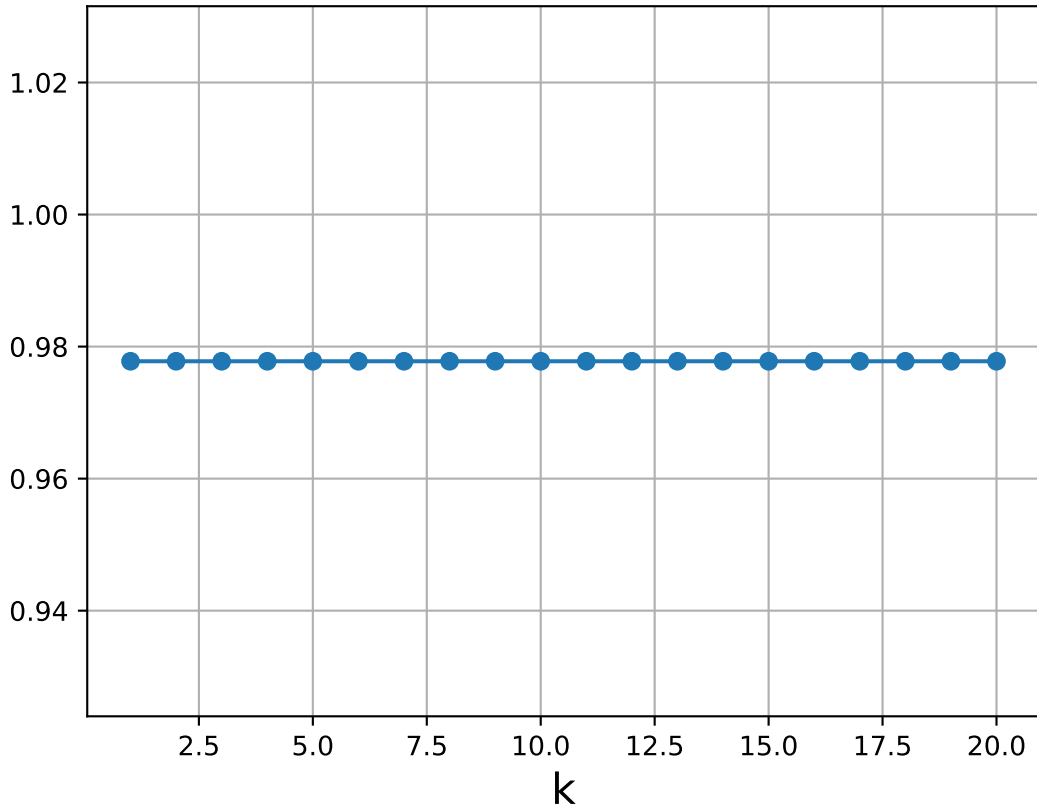

Supplement: Supplementary file 15 [file JD_images.pdf › online-two-stage-sub-max-main/online-two-stage-sub-max-experiments/plots/analysis/images/JD_images.pdf]

Average Reward vs Average Jaccard Distance (images)

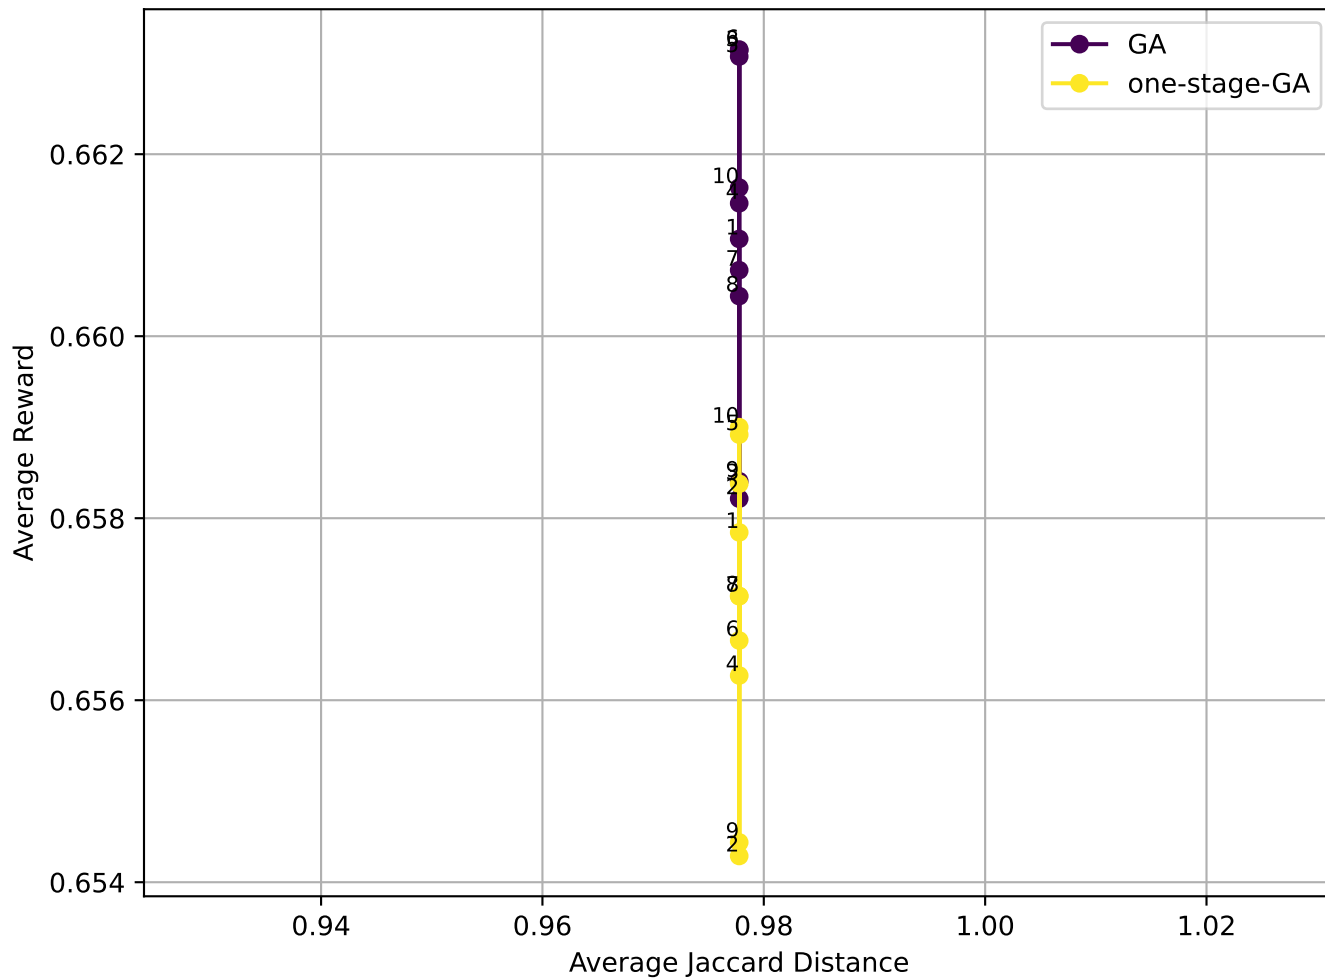

Supplement: Supplementary file 16 [file reward_vs_JD.pdf › online-two-stage-sub-max-main/online-two-stage-sub-max-experiments/plots/analysis/images/reward_vs_JD.pdf]

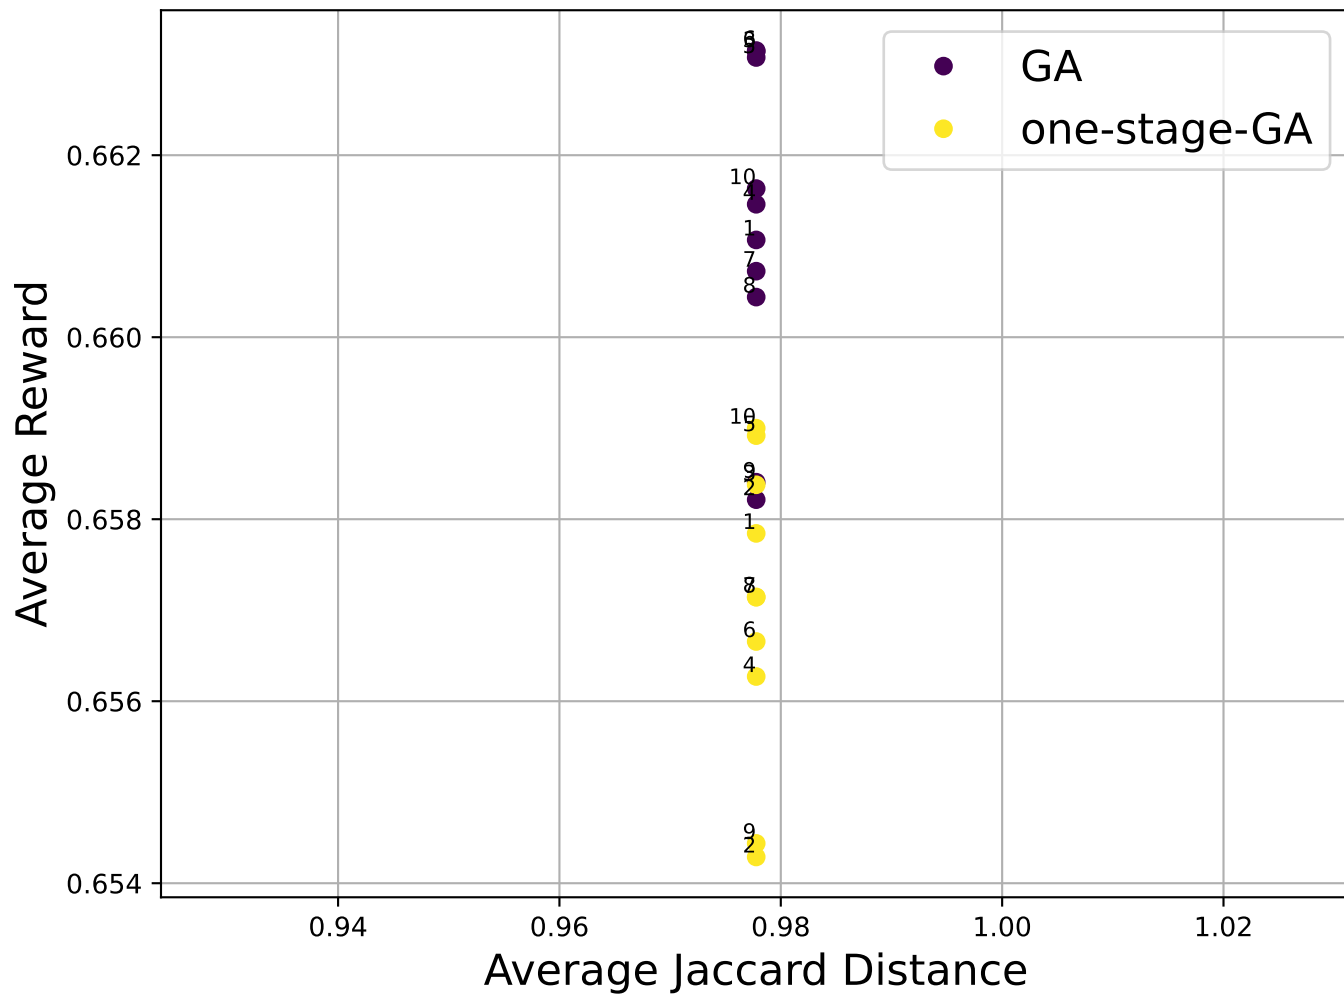

Supplement: Supplementary file 17 [file reward_vs_JD_images.pdf › online-two-stage-sub-max-main/online-two-stage-sub-max-experiments/plots/analysis/images/reward_vs_JD_images.pdf]

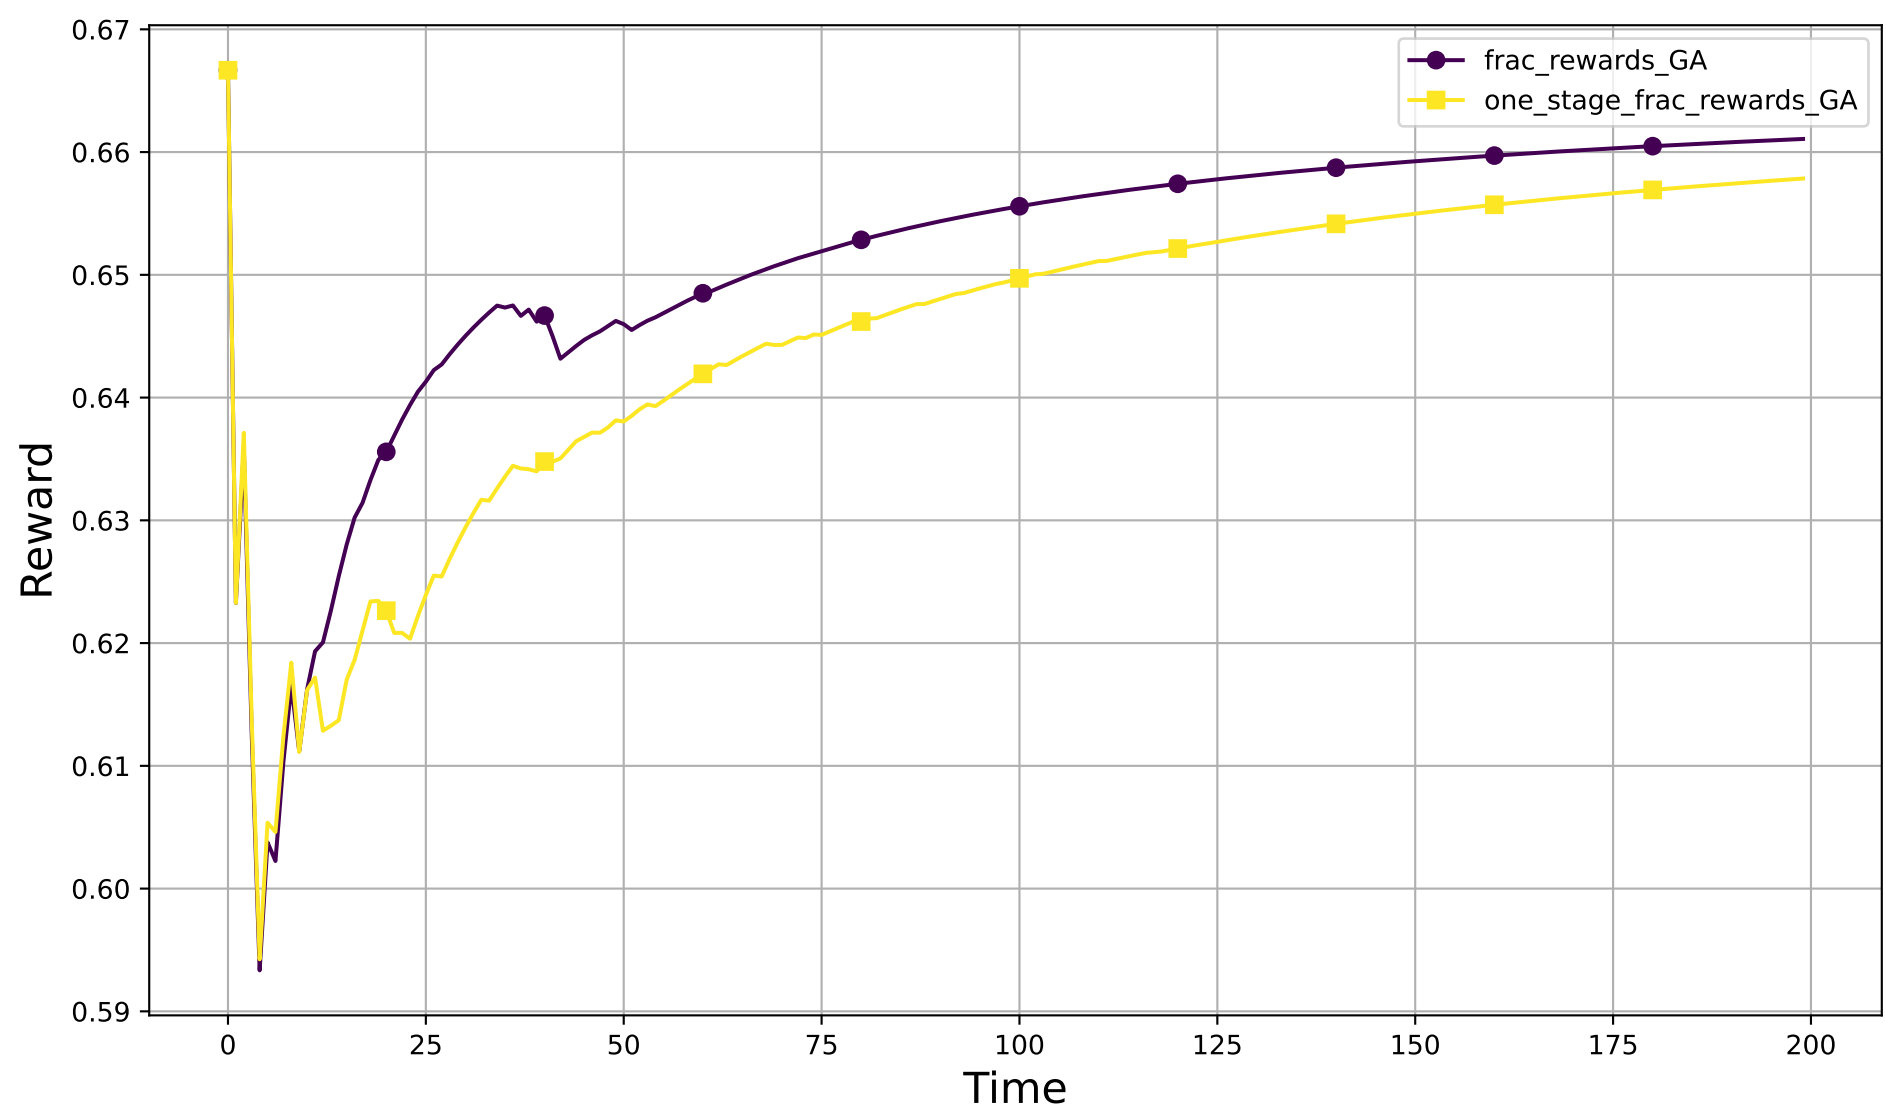

Supplement: Supplementary file 18 [file rewards_k1.pdf › online-two-stage-sub-max-main/online-two-stage-sub-max-experiments/plots/analysis/images/rewards_k1.pdf]

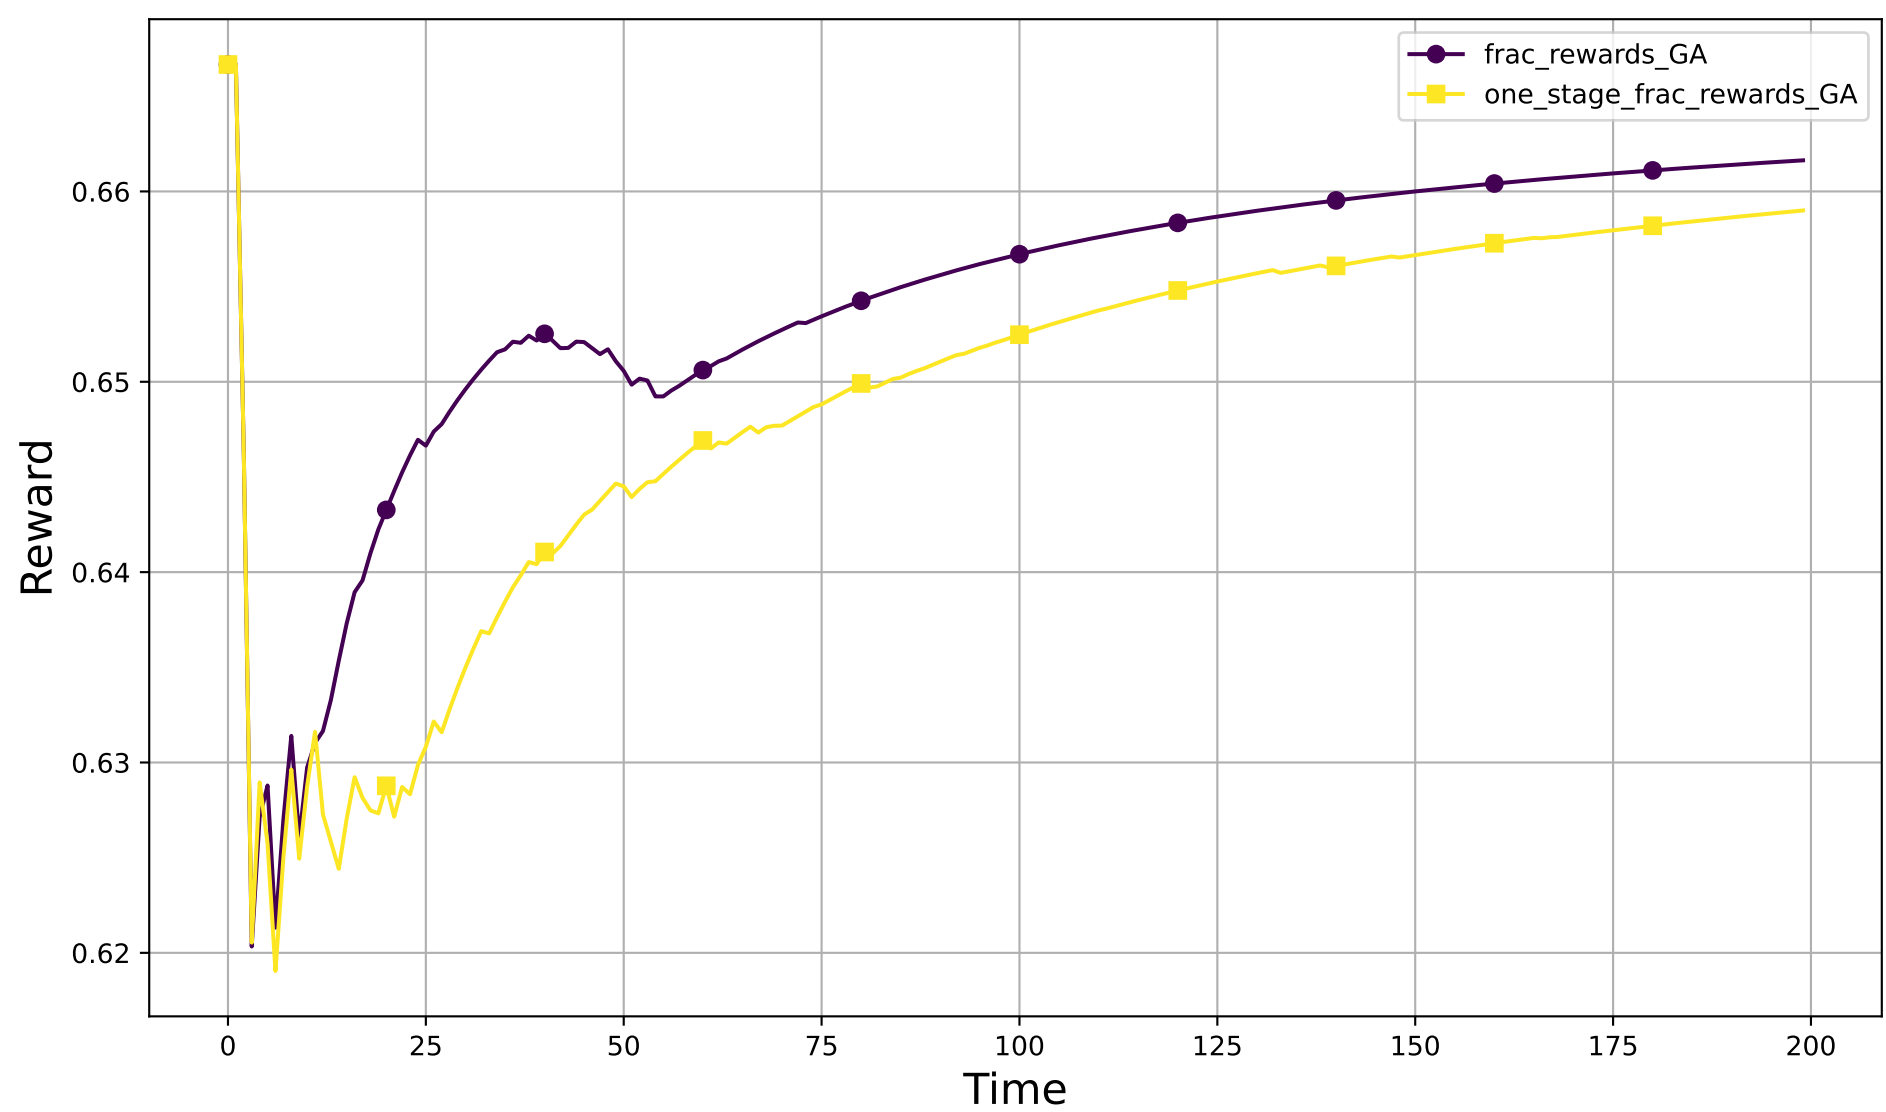

Supplement: Supplementary file 19 [file rewards_k10.pdf › online-two-stage-sub-max-main/online-two-stage-sub-max-experiments/plots/analysis/images/rewards_k10.pdf]

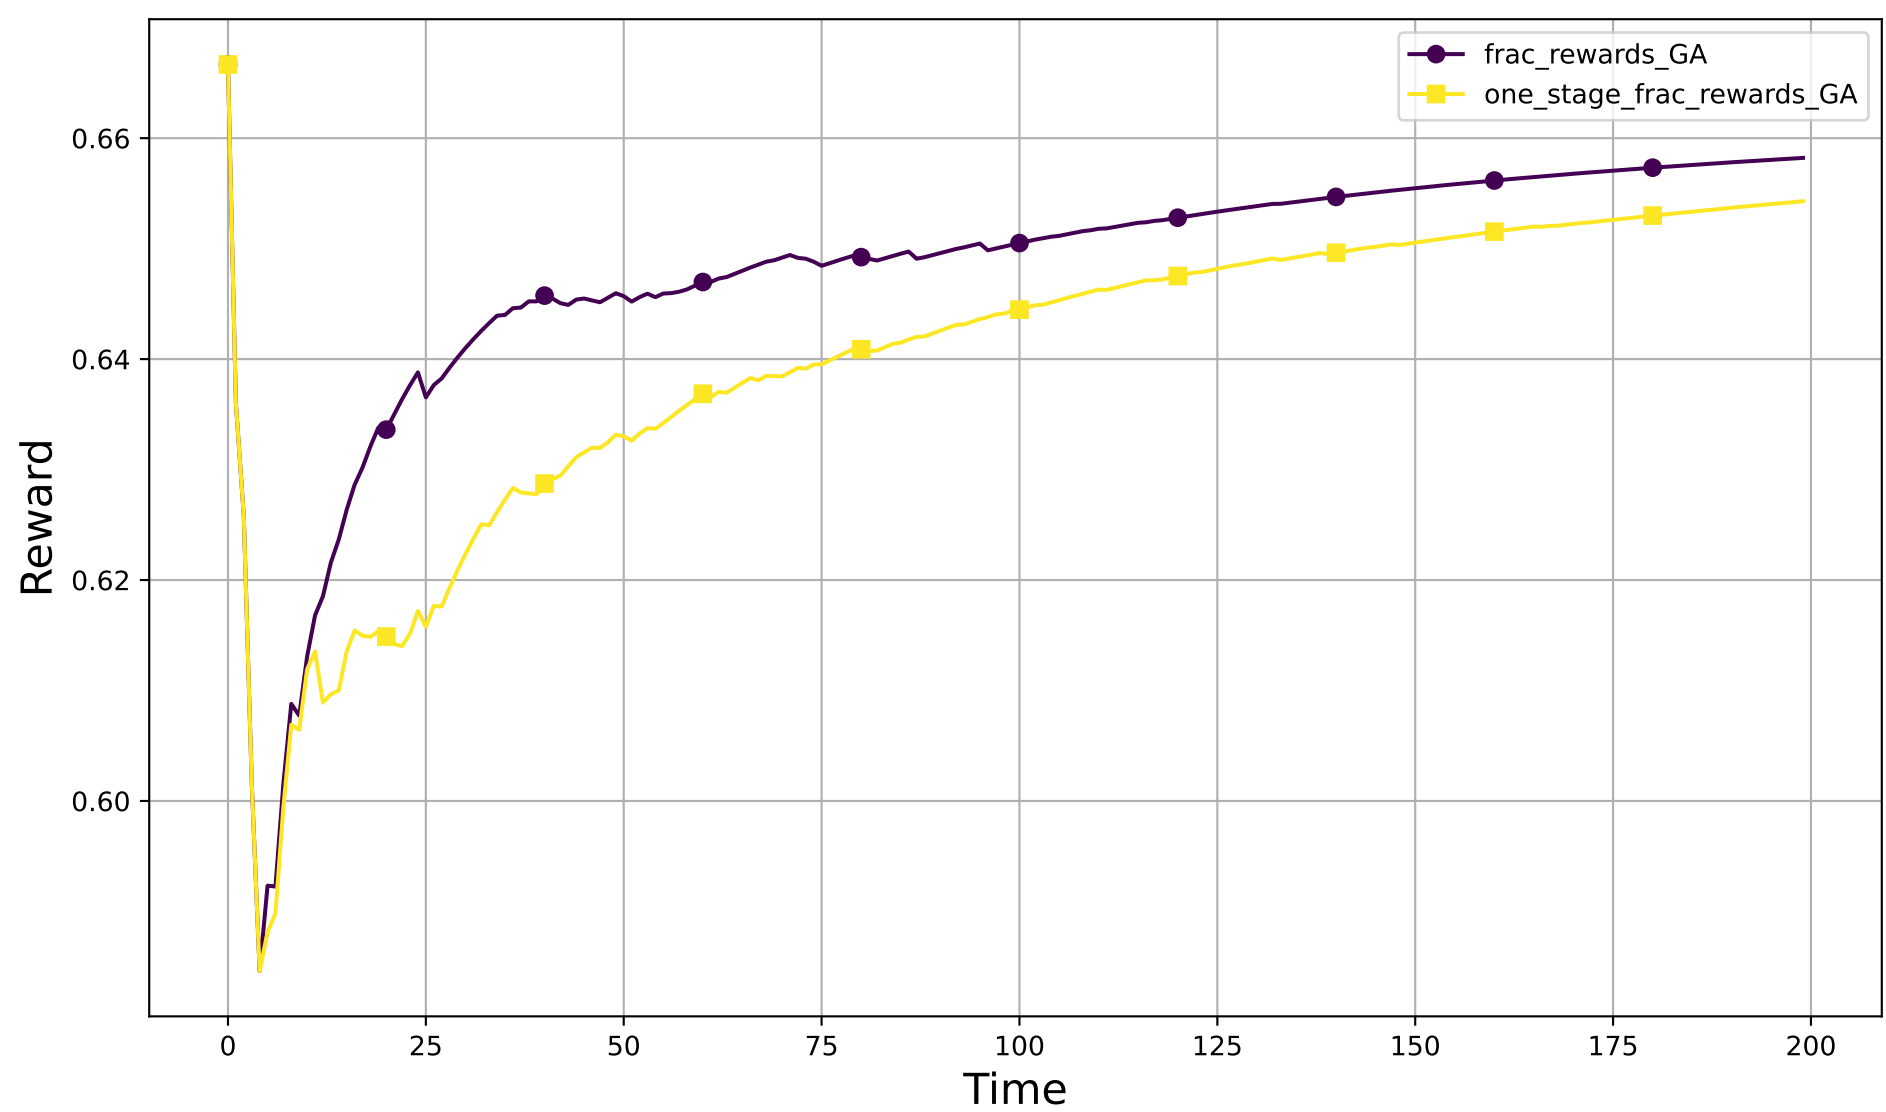

Supplement: Supplementary file 20 [file rewards_k2.pdf › online-two-stage-sub-max-main/online-two-stage-sub-max-experiments/plots/analysis/images/rewards_k2.pdf]

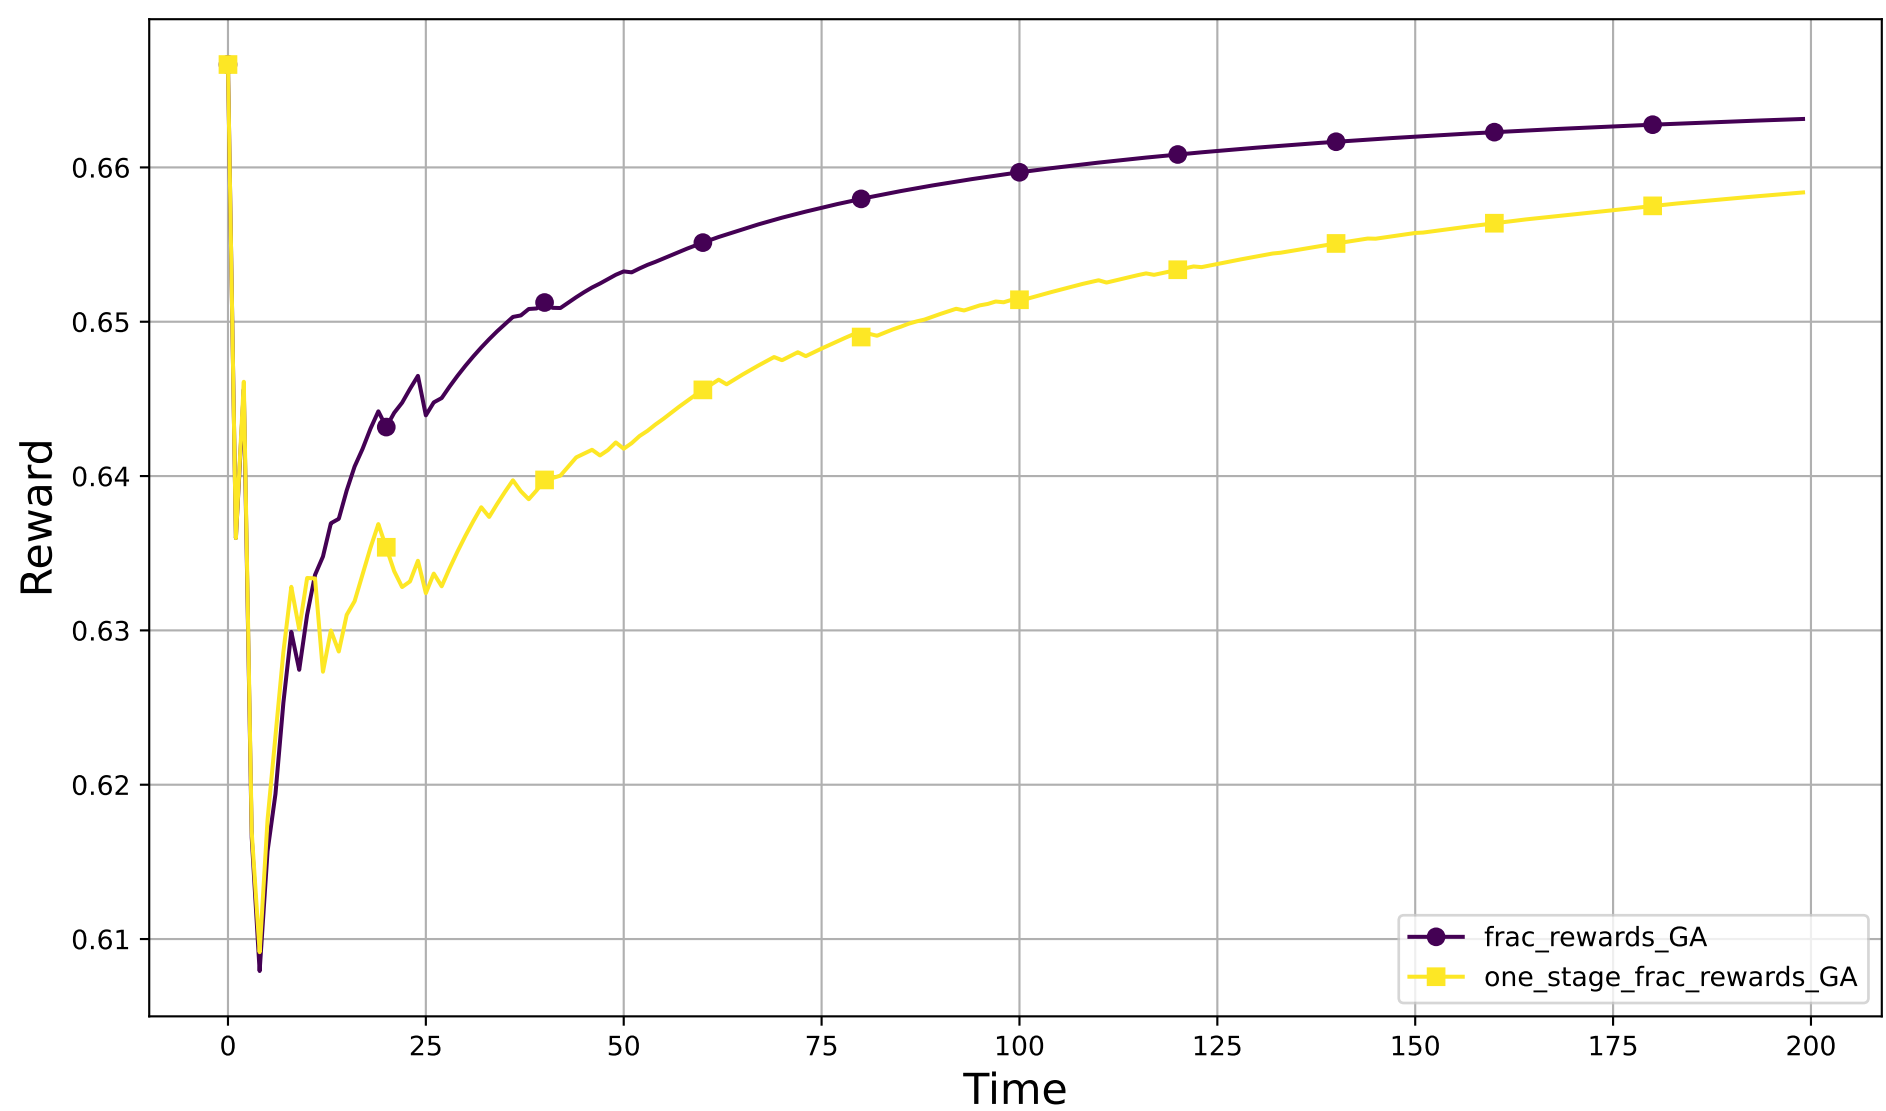

Supplement: Supplementary file 21 [file rewards_k3.pdf › online-two-stage-sub-max-main/online-two-stage-sub-max-experiments/plots/analysis/images/rewards_k3.pdf]

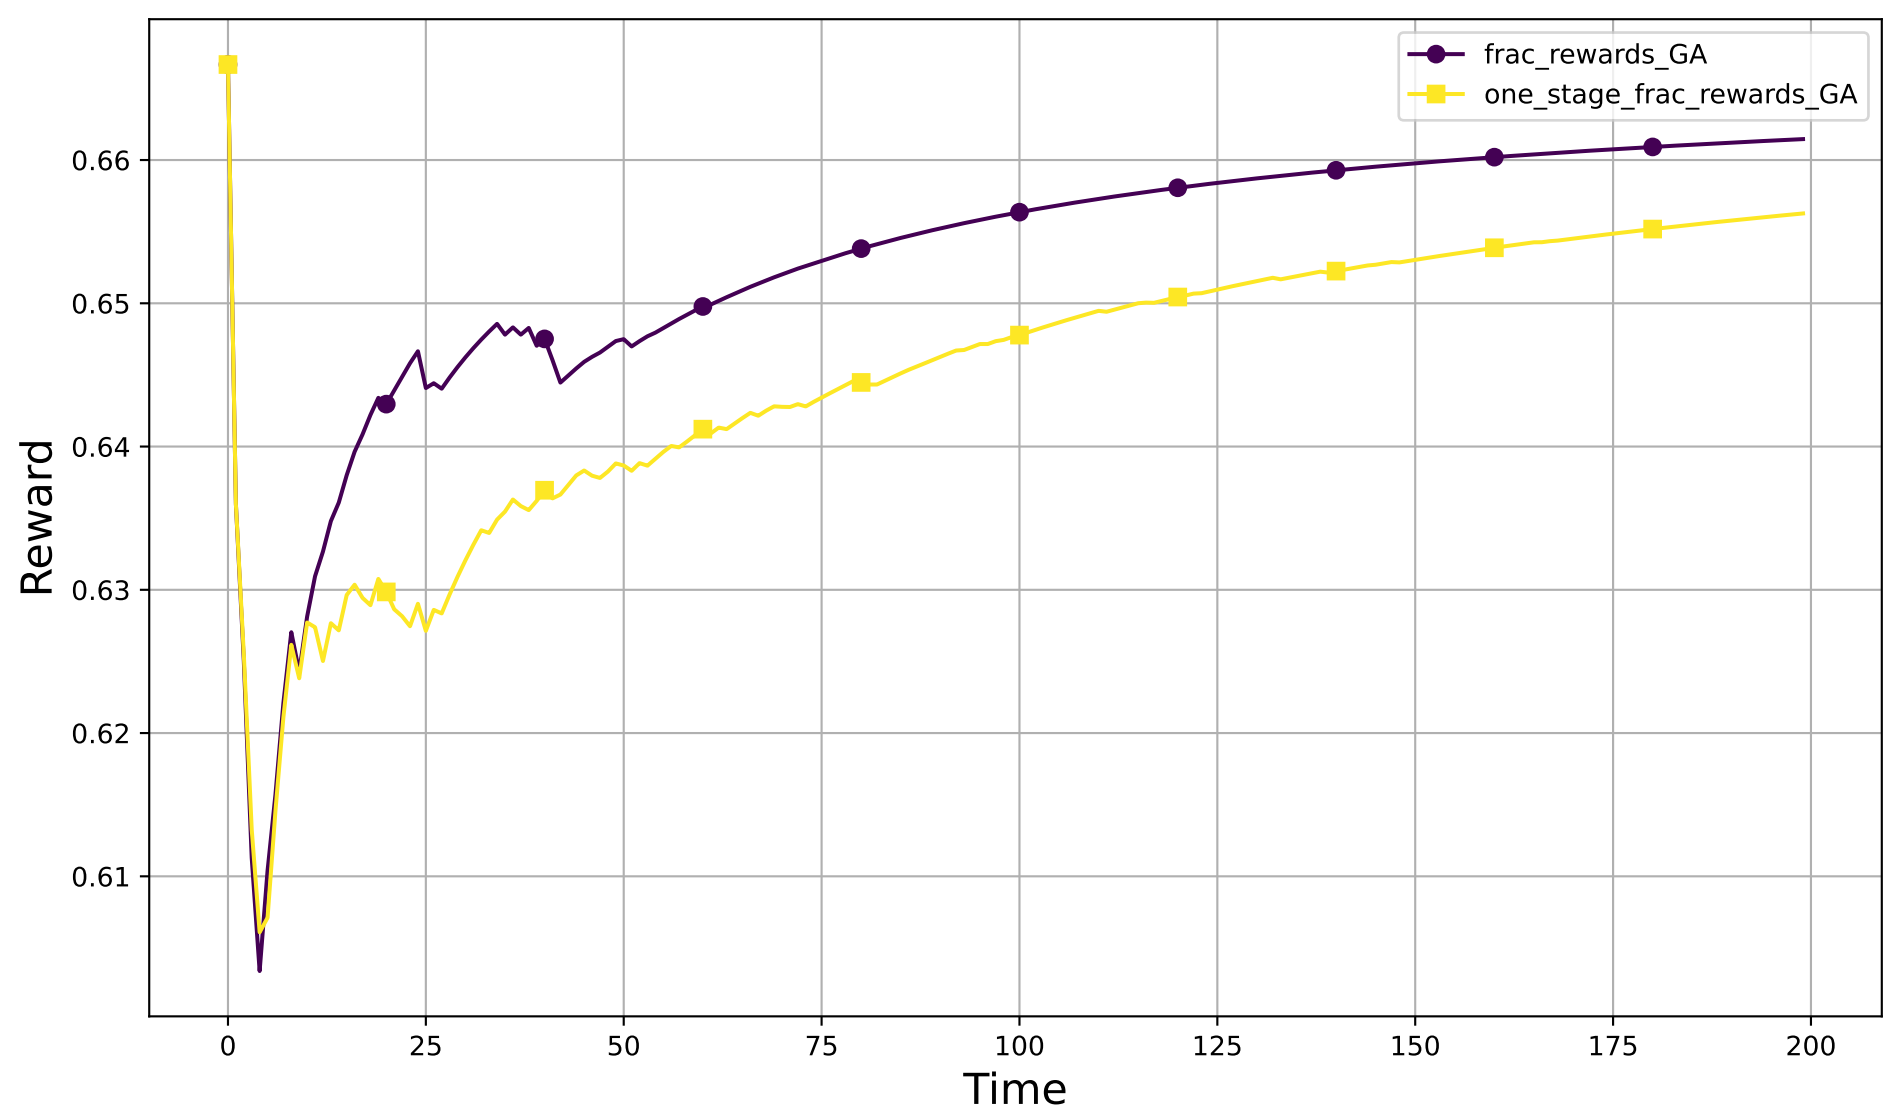

Supplement: Supplementary file 22 [file rewards_k4.pdf › online-two-stage-sub-max-main/online-two-stage-sub-max-experiments/plots/analysis/images/rewards_k4.pdf]

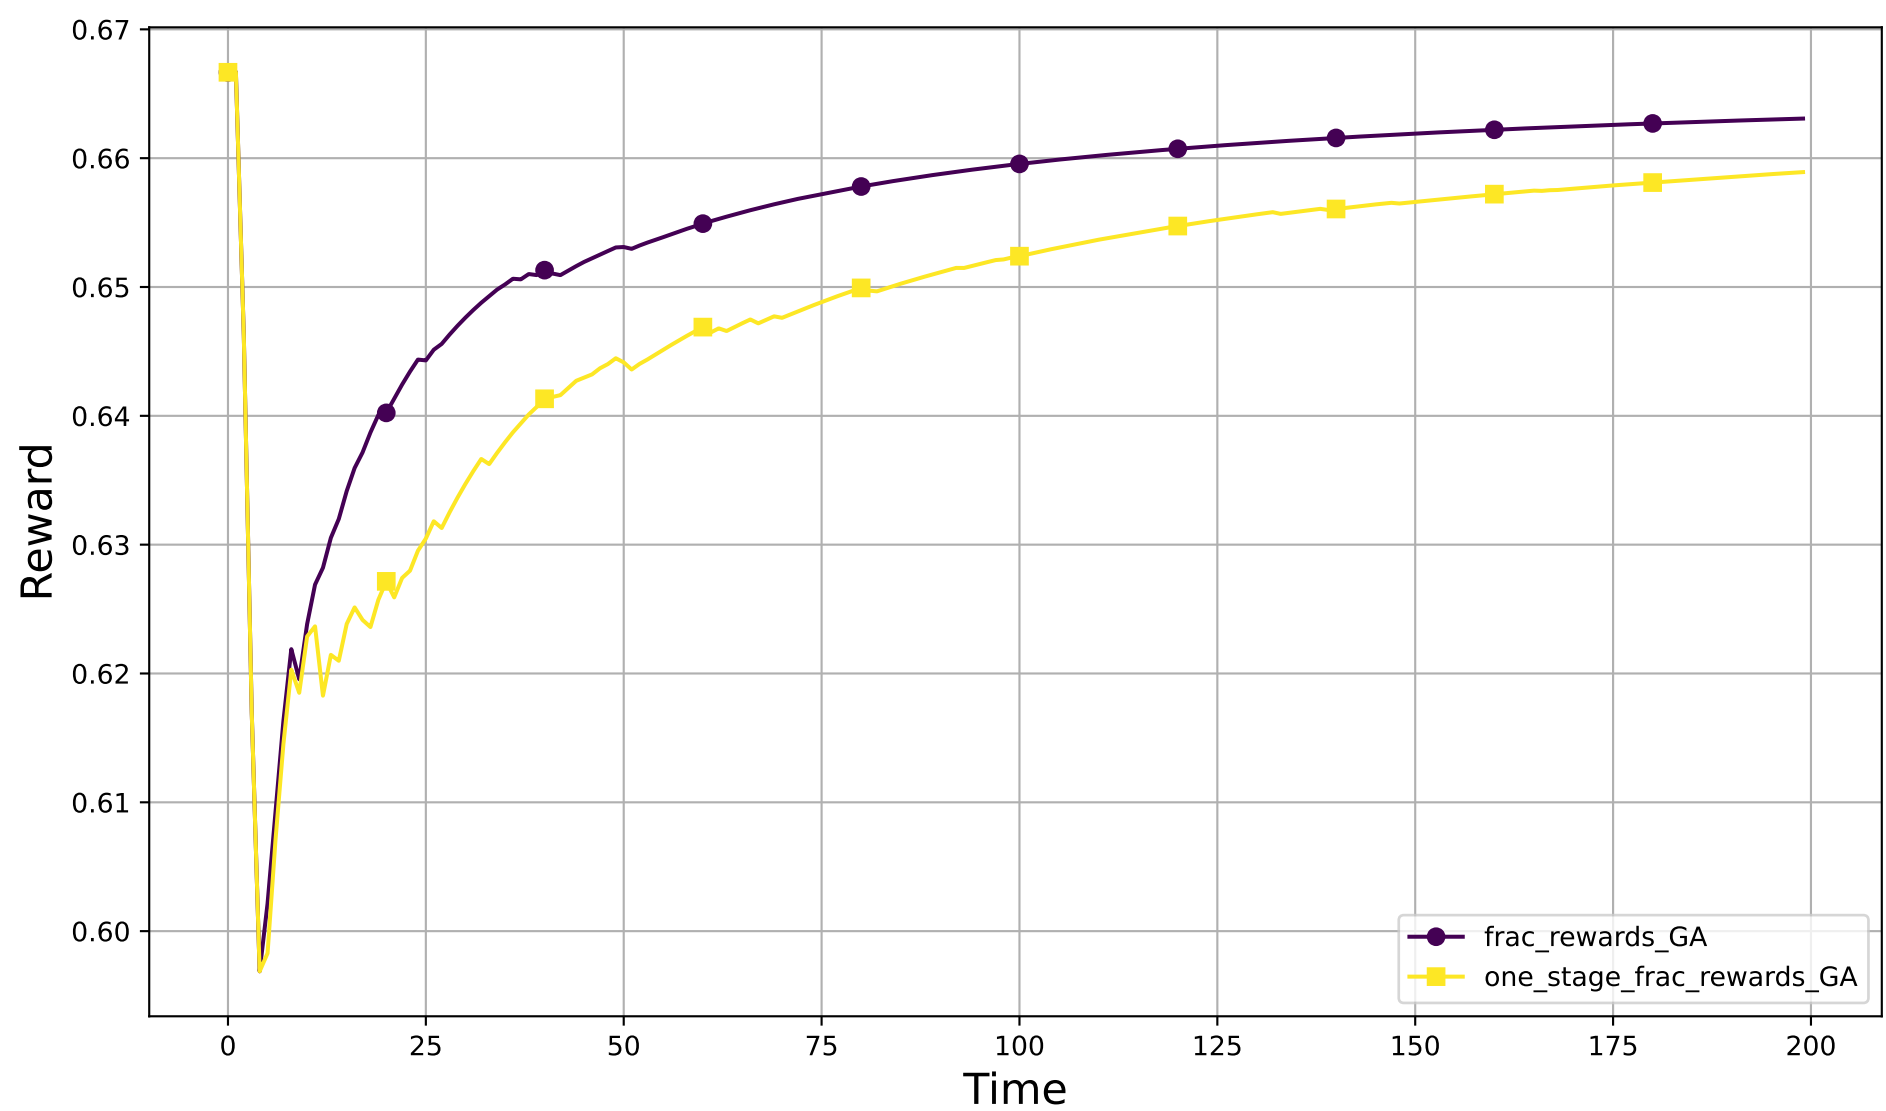

Supplement: Supplementary file 23 [file rewards_k5.pdf › online-two-stage-sub-max-main/online-two-stage-sub-max-experiments/plots/analysis/images/rewards_k5.pdf]

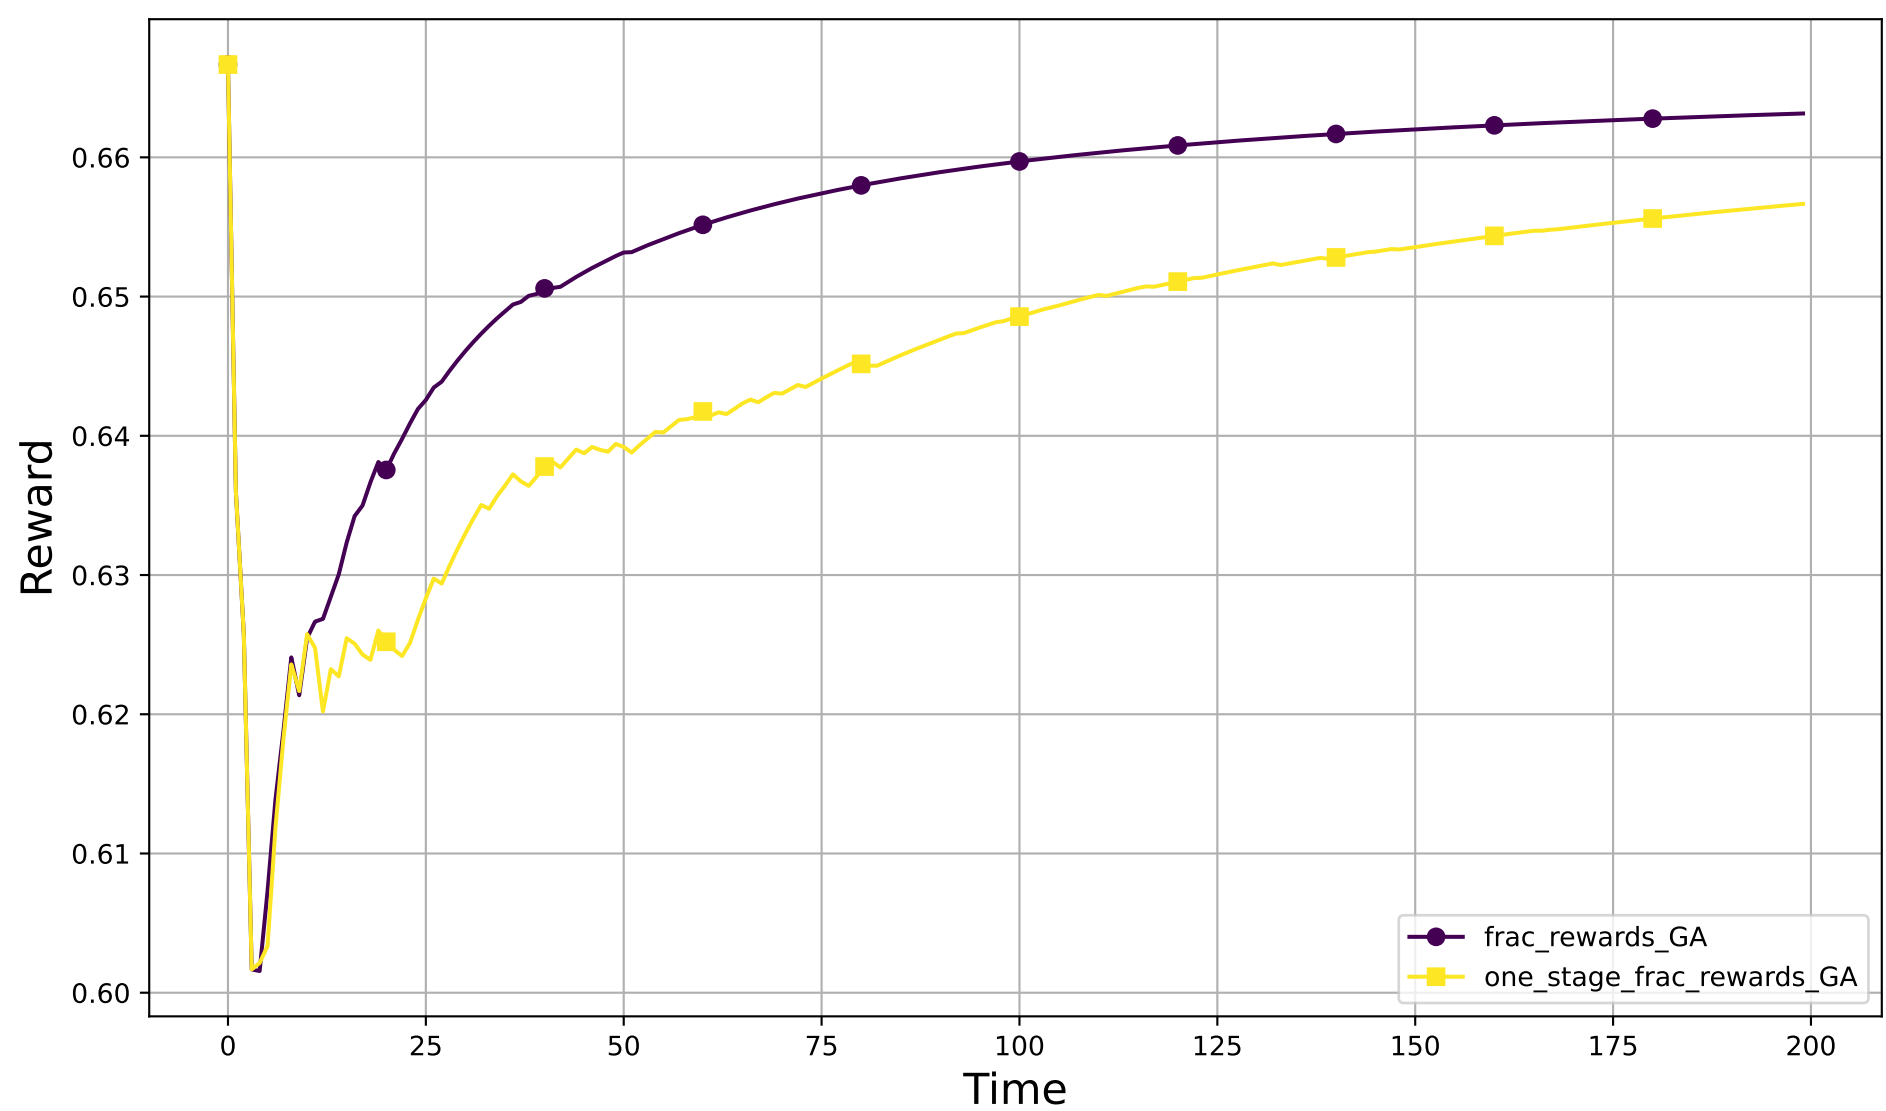

Supplement: Supplementary file 24 [file rewards_k6.pdf › online-two-stage-sub-max-main/online-two-stage-sub-max-experiments/plots/analysis/images/rewards_k6.pdf]

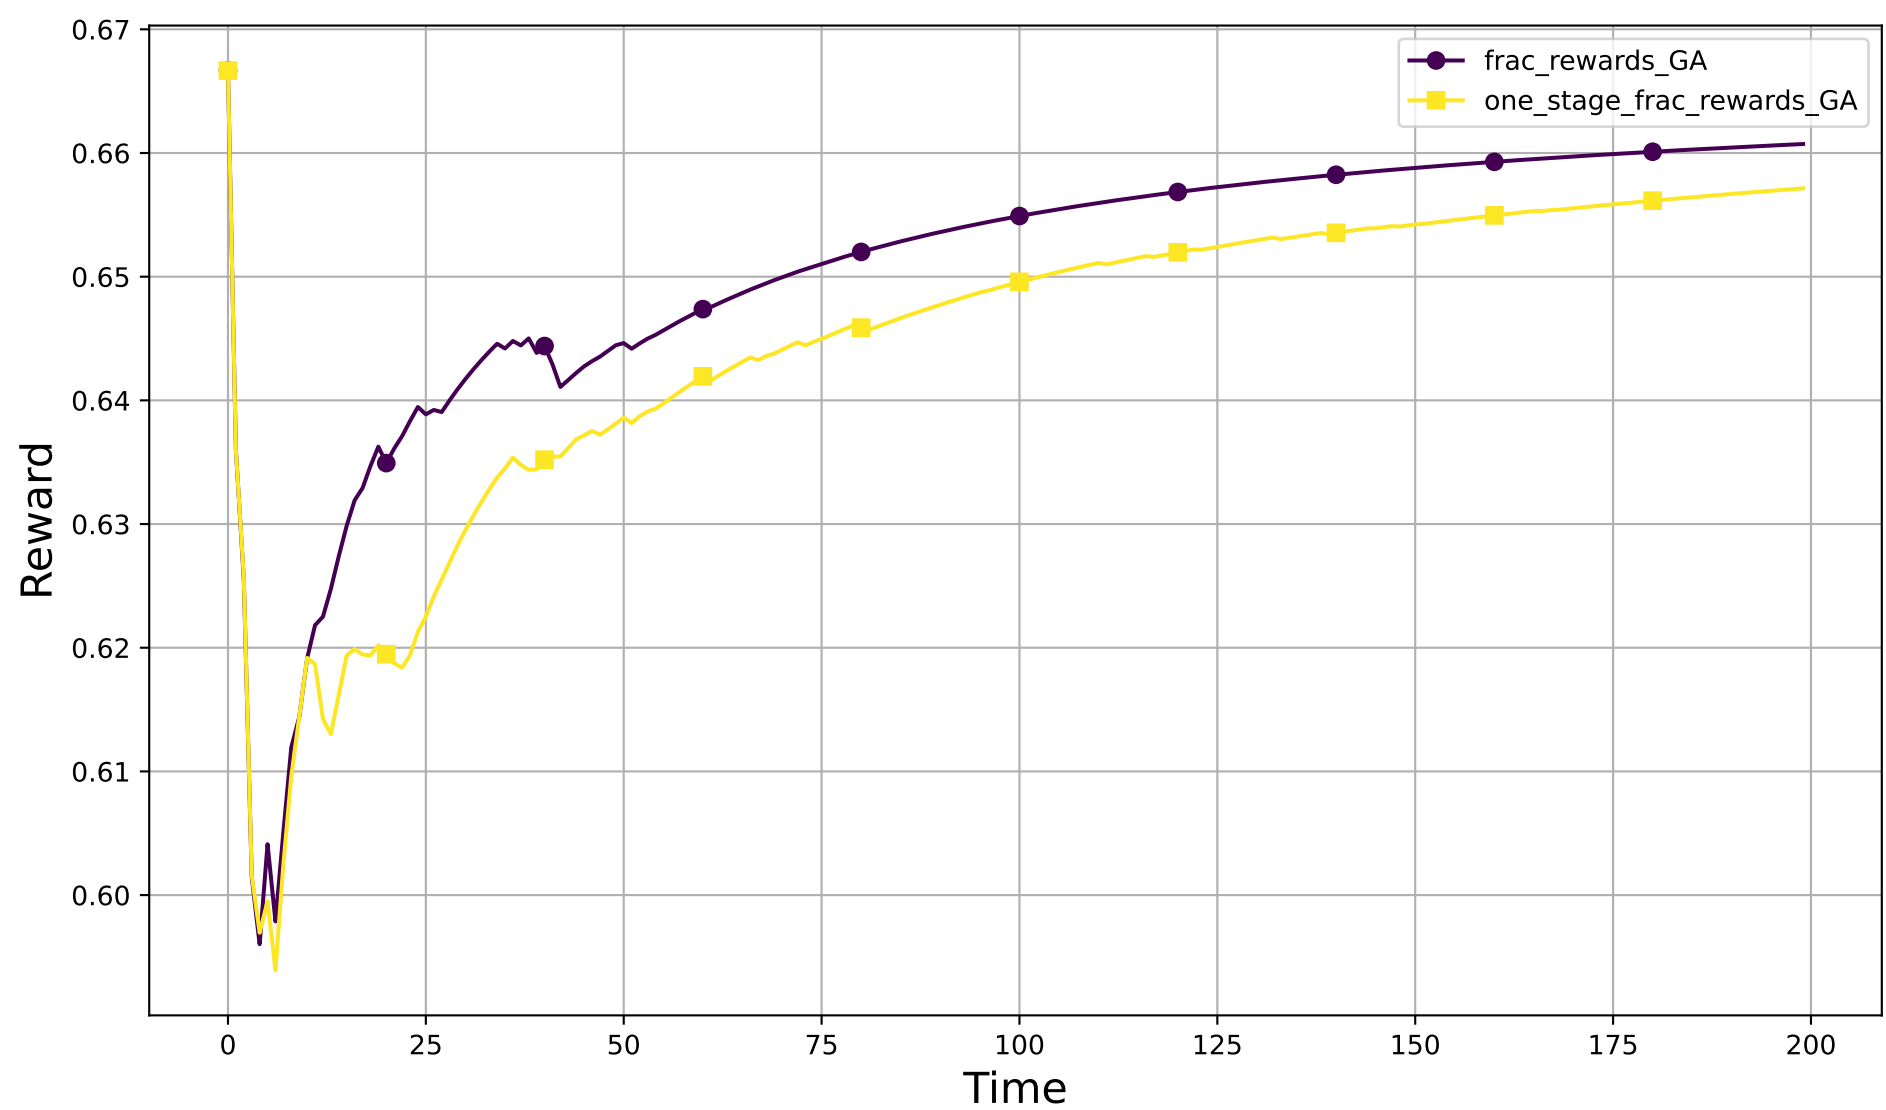

Supplement: Supplementary file 25 [file rewards_k7.pdf › online-two-stage-sub-max-main/online-two-stage-sub-max-experiments/plots/analysis/images/rewards_k7.pdf]

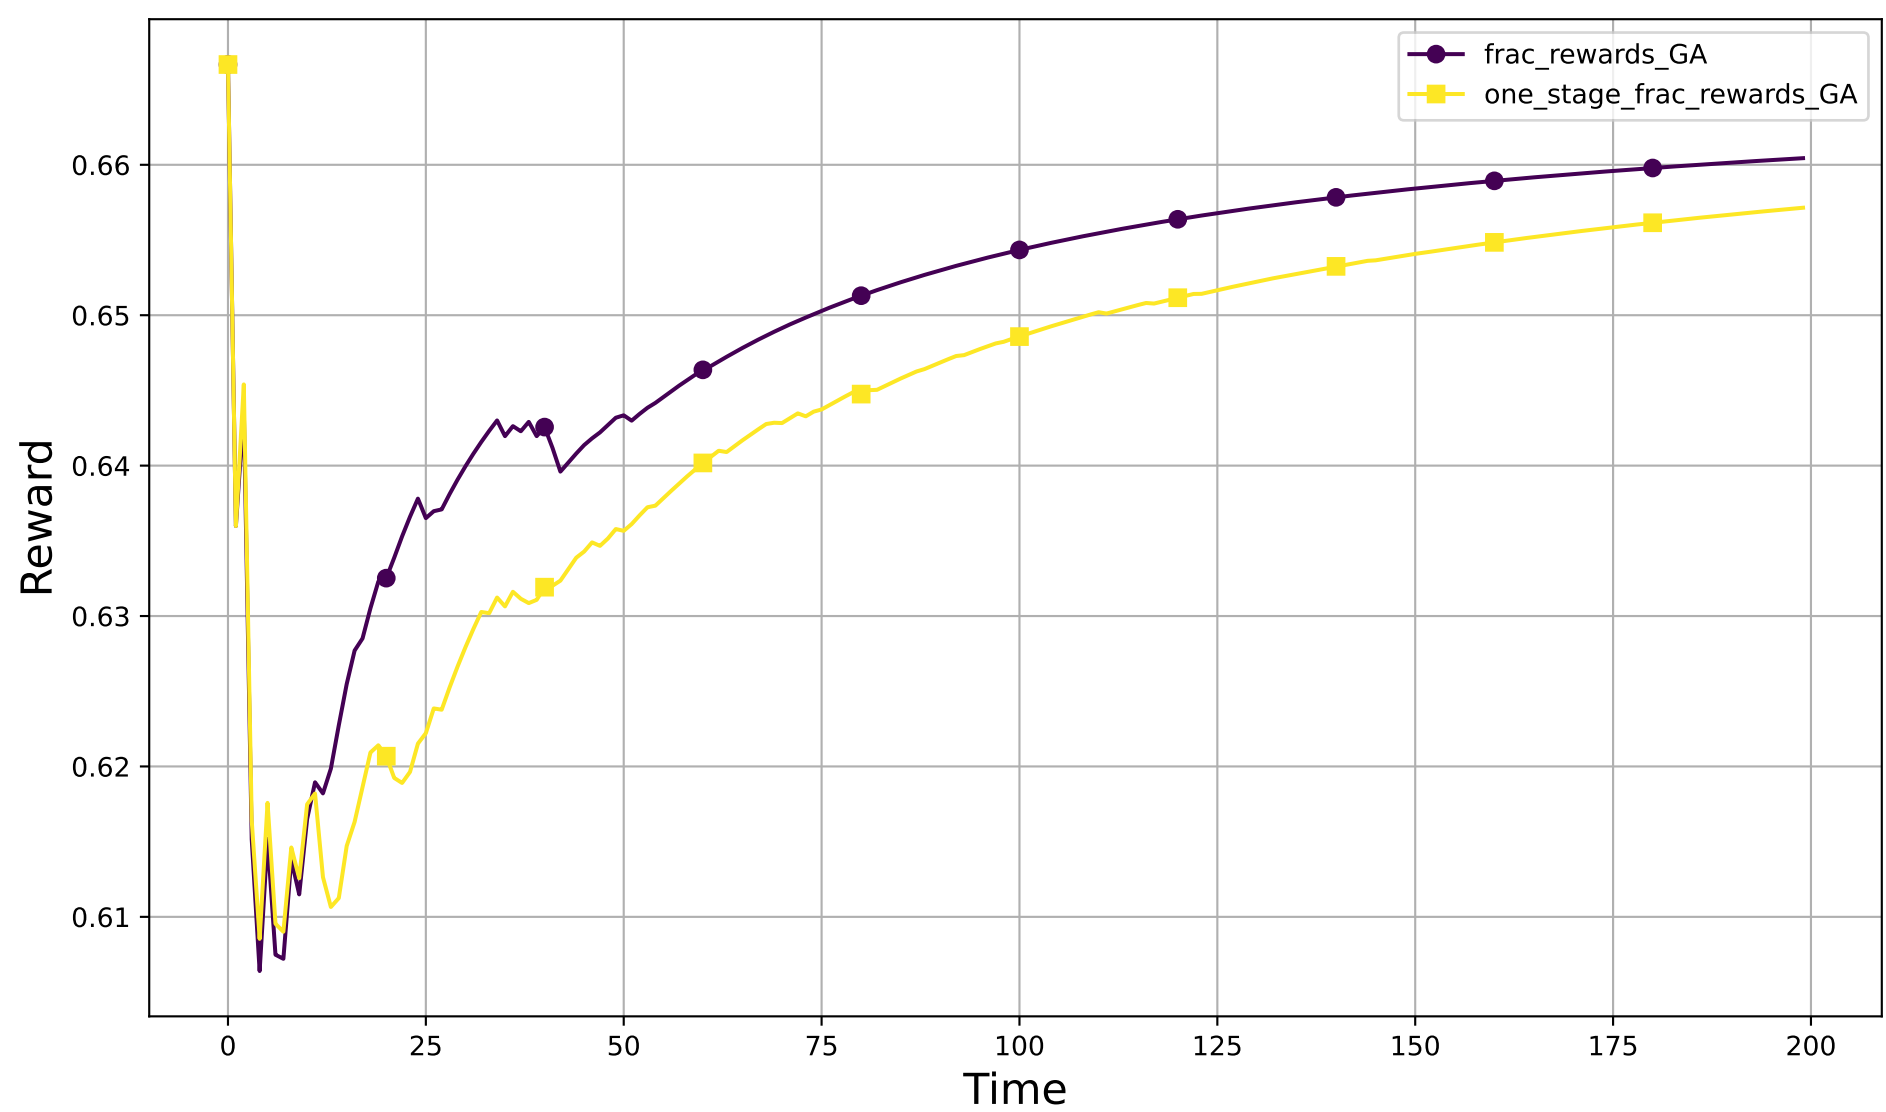

Supplement: Supplementary file 26 [file rewards_k8.pdf › online-two-stage-sub-max-main/online-two-stage-sub-max-experiments/plots/analysis/images/rewards_k8.pdf]

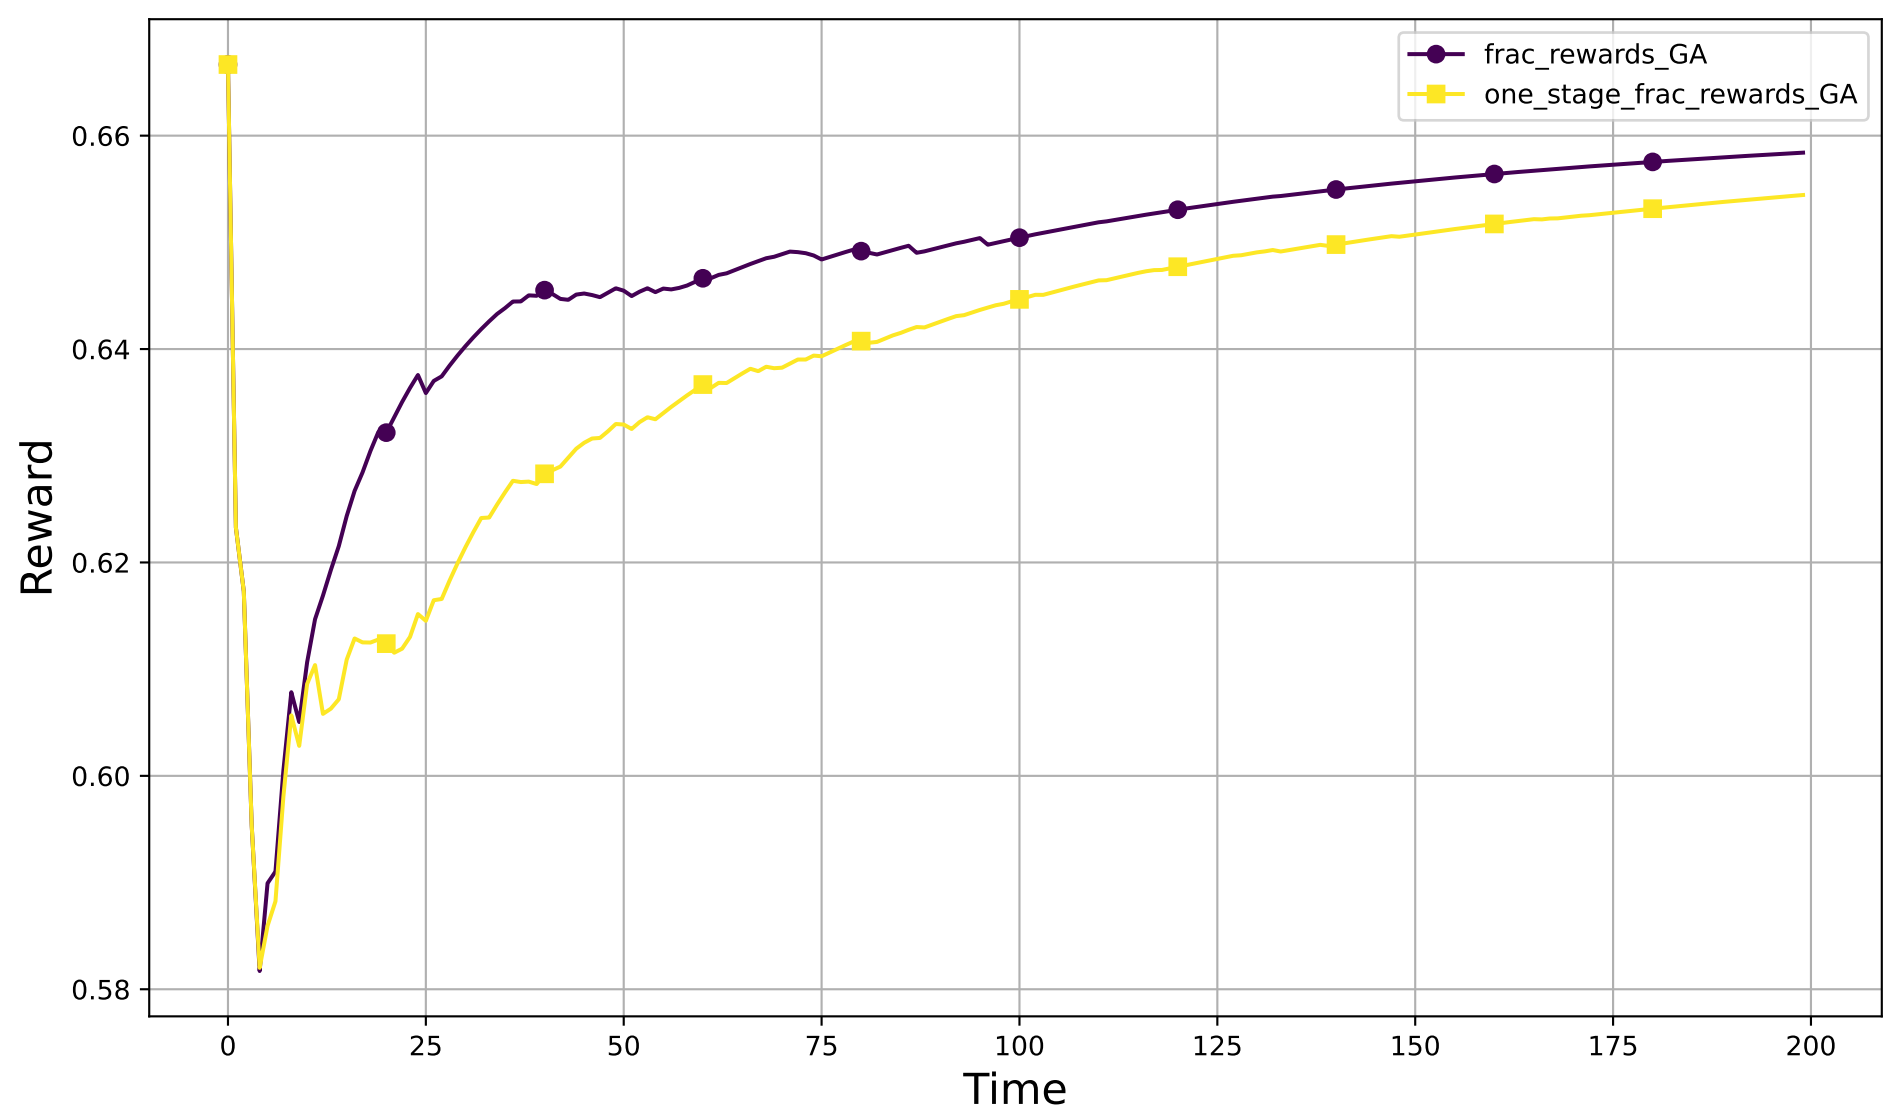

Supplement: Supplementary file 27 [file rewards_k9.pdf › online-two-stage-sub-max-main/online-two-stage-sub-max-experiments/plots/analysis/images/rewards_k9.pdf]

Distribution of Potential Weights

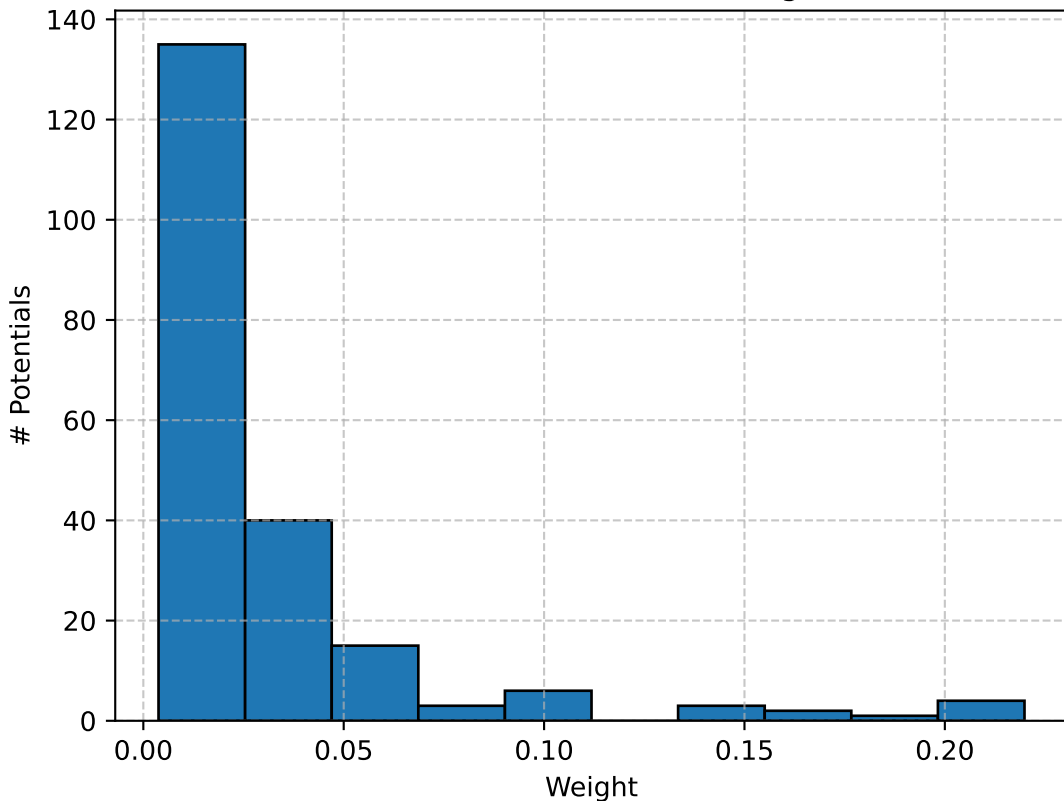

Supplement: Supplementary file 28 [file wtp_weights_dist.pdf › online-two-stage-sub-max-main/online-two-stage-sub-max-experiments/plots/analysis/images/wtp_weights_dist.pdf]

Distribution of Potential Weights



Supplement: Supplementary file 29 [file wtp_weights_dist_images.pdf › online-two-stage-sub-max-main/online-two-stage-sub-max-experiments/plots/analysis/images/wtp_weights_dist_images.pdf]

k vs Average Jaccard Distance of Optimal Solutions

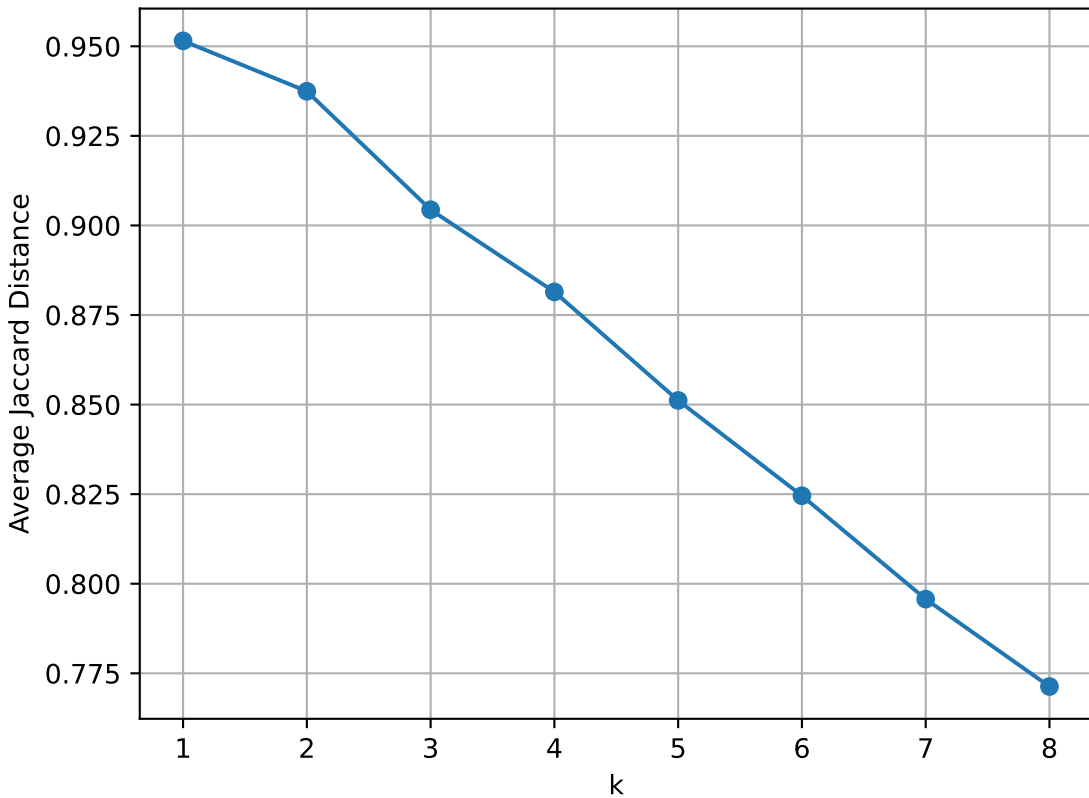

Supplement: Supplementary file 30 [file JD.pdf › online-two-stage-sub-max-main/online-two-stage-sub-max-experiments/plots/analysis/influence/JD.pdf]

Average Jaccard Distance

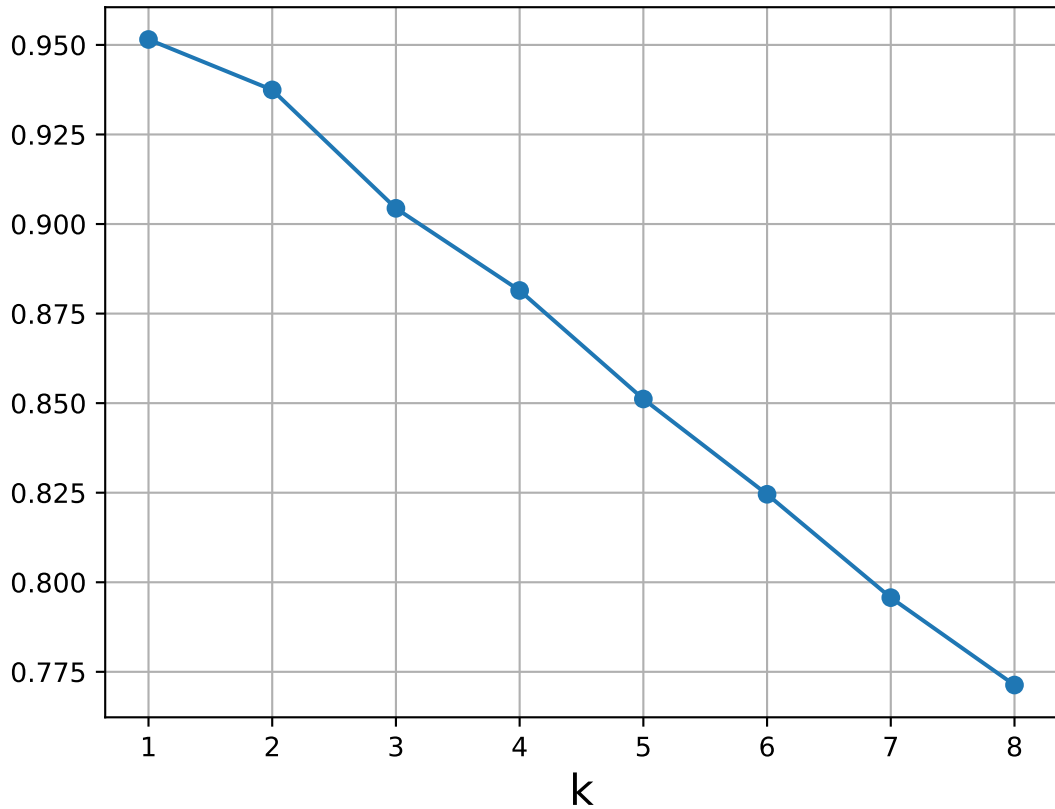

Supplement: Supplementary file 31 [file JD_influence.pdf › online-two-stage-sub-max-main/online-two-stage-sub-max-experiments/plots/analysis/influence/JD_influence.pdf]

Average Reward vs Average Jaccard Distance (influence)

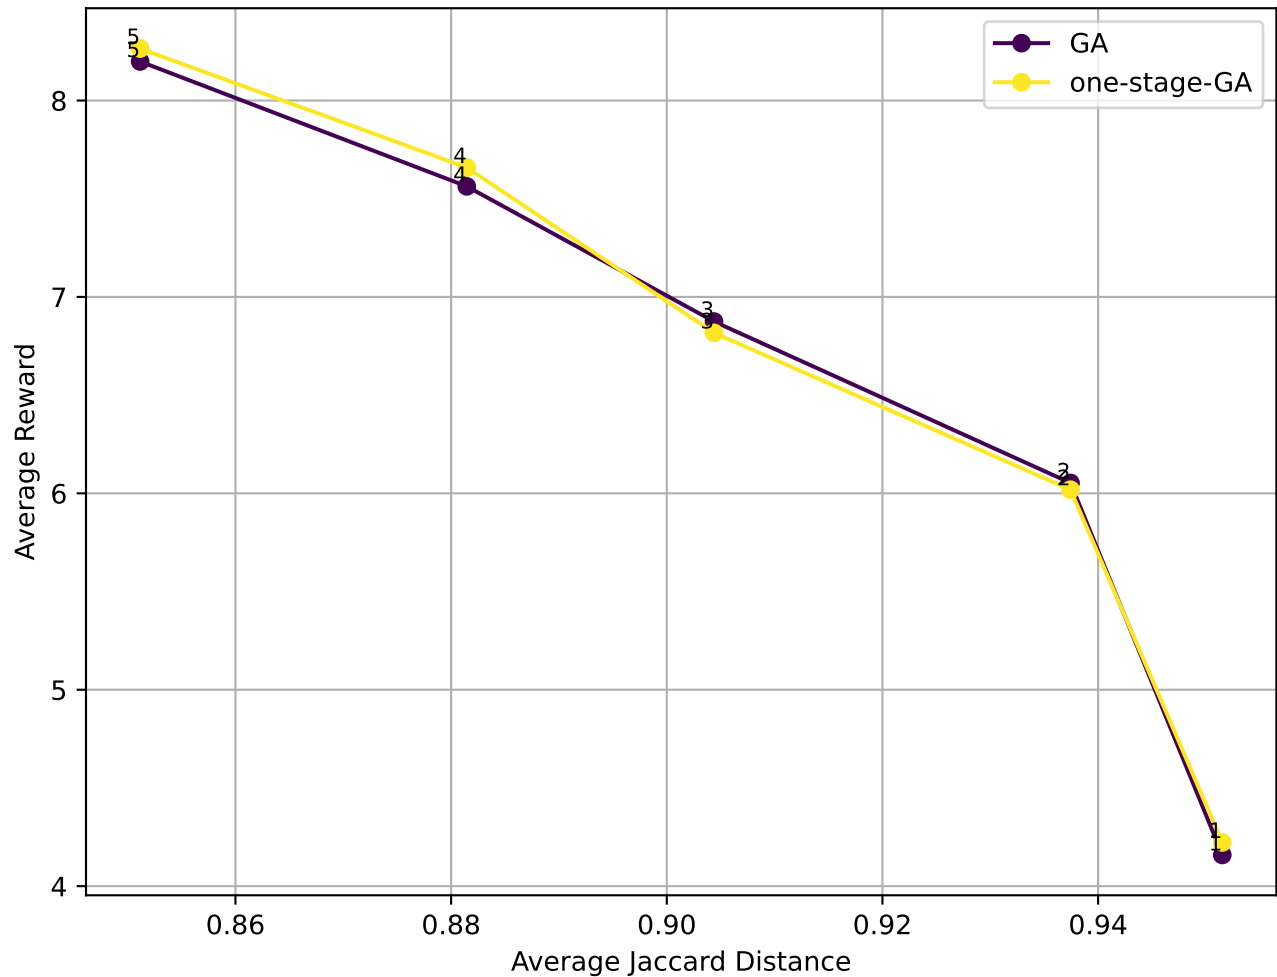

Supplement: Supplementary file 32 [file reward_vs_JD.pdf › online-two-stage-sub-max-main/online-two-stage-sub-max-experiments/plots/analysis/influence/reward_vs_JD.pdf]

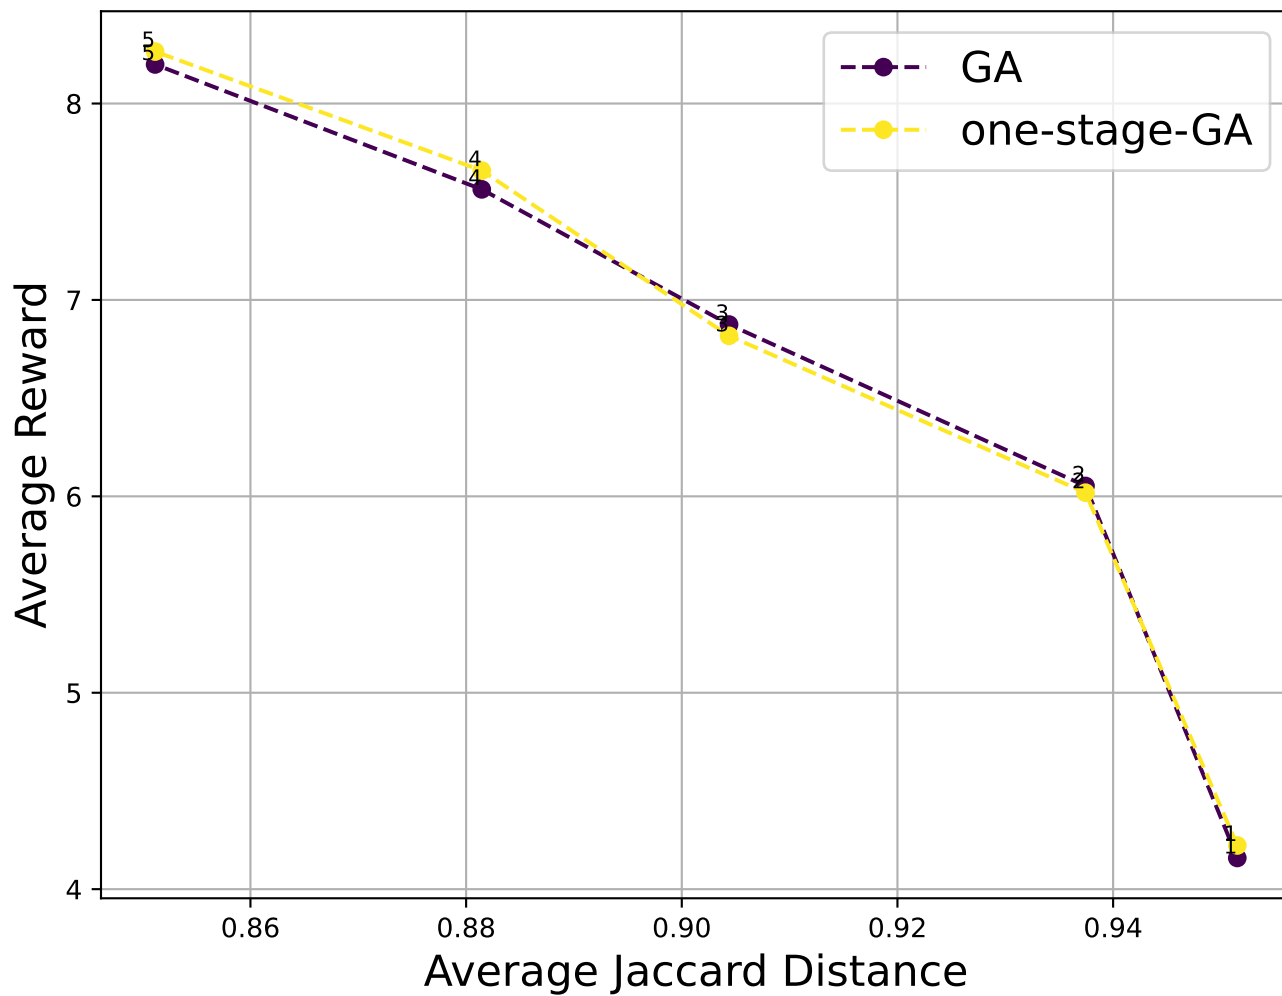

Supplement: Supplementary file 33 [file reward_vs_JD_influence.pdf › online-two-stage-sub-max-main/online-two-stage-sub-max-experiments/plots/analysis/influence/reward_vs_JD_influence.pdf]

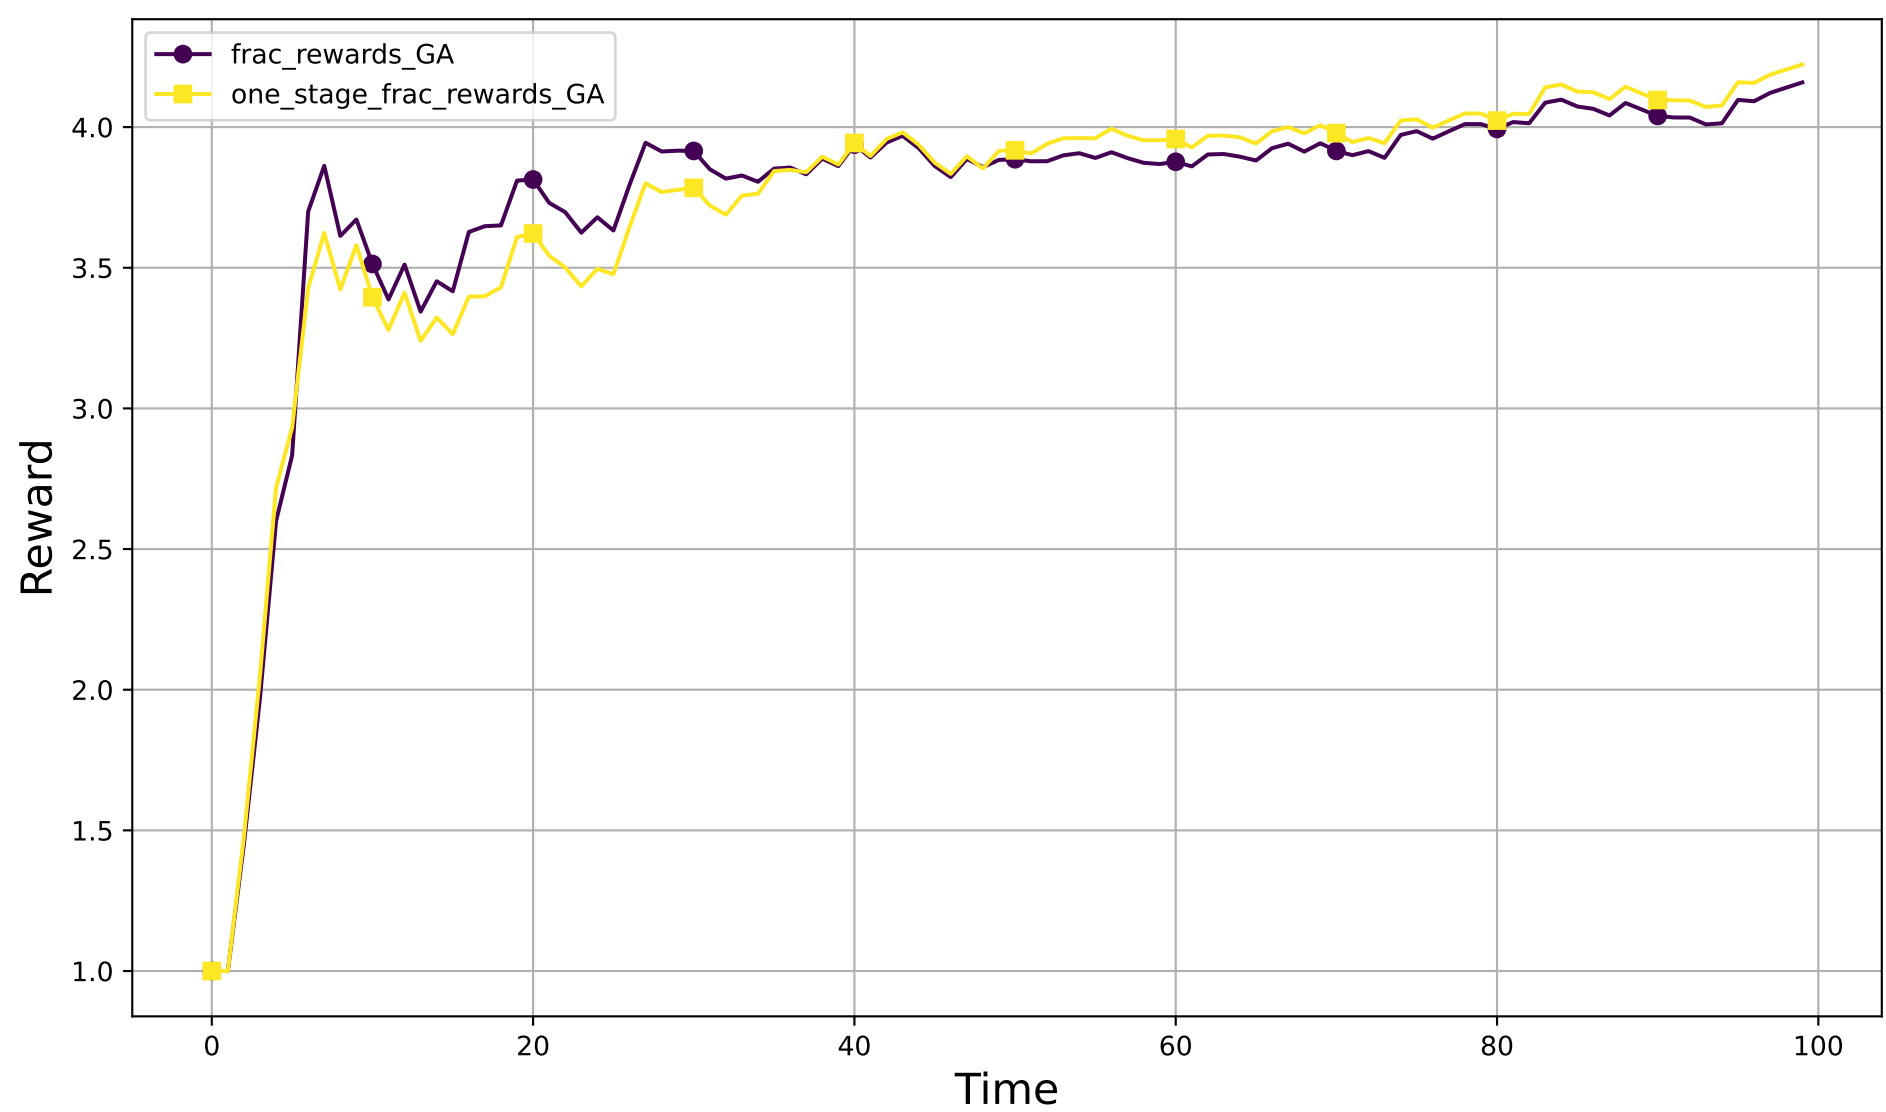

Supplement: Supplementary file 34 [file rewards_k1.pdf › online-two-stage-sub-max-main/online-two-stage-sub-max-experiments/plots/analysis/influence/rewards_k1.pdf]

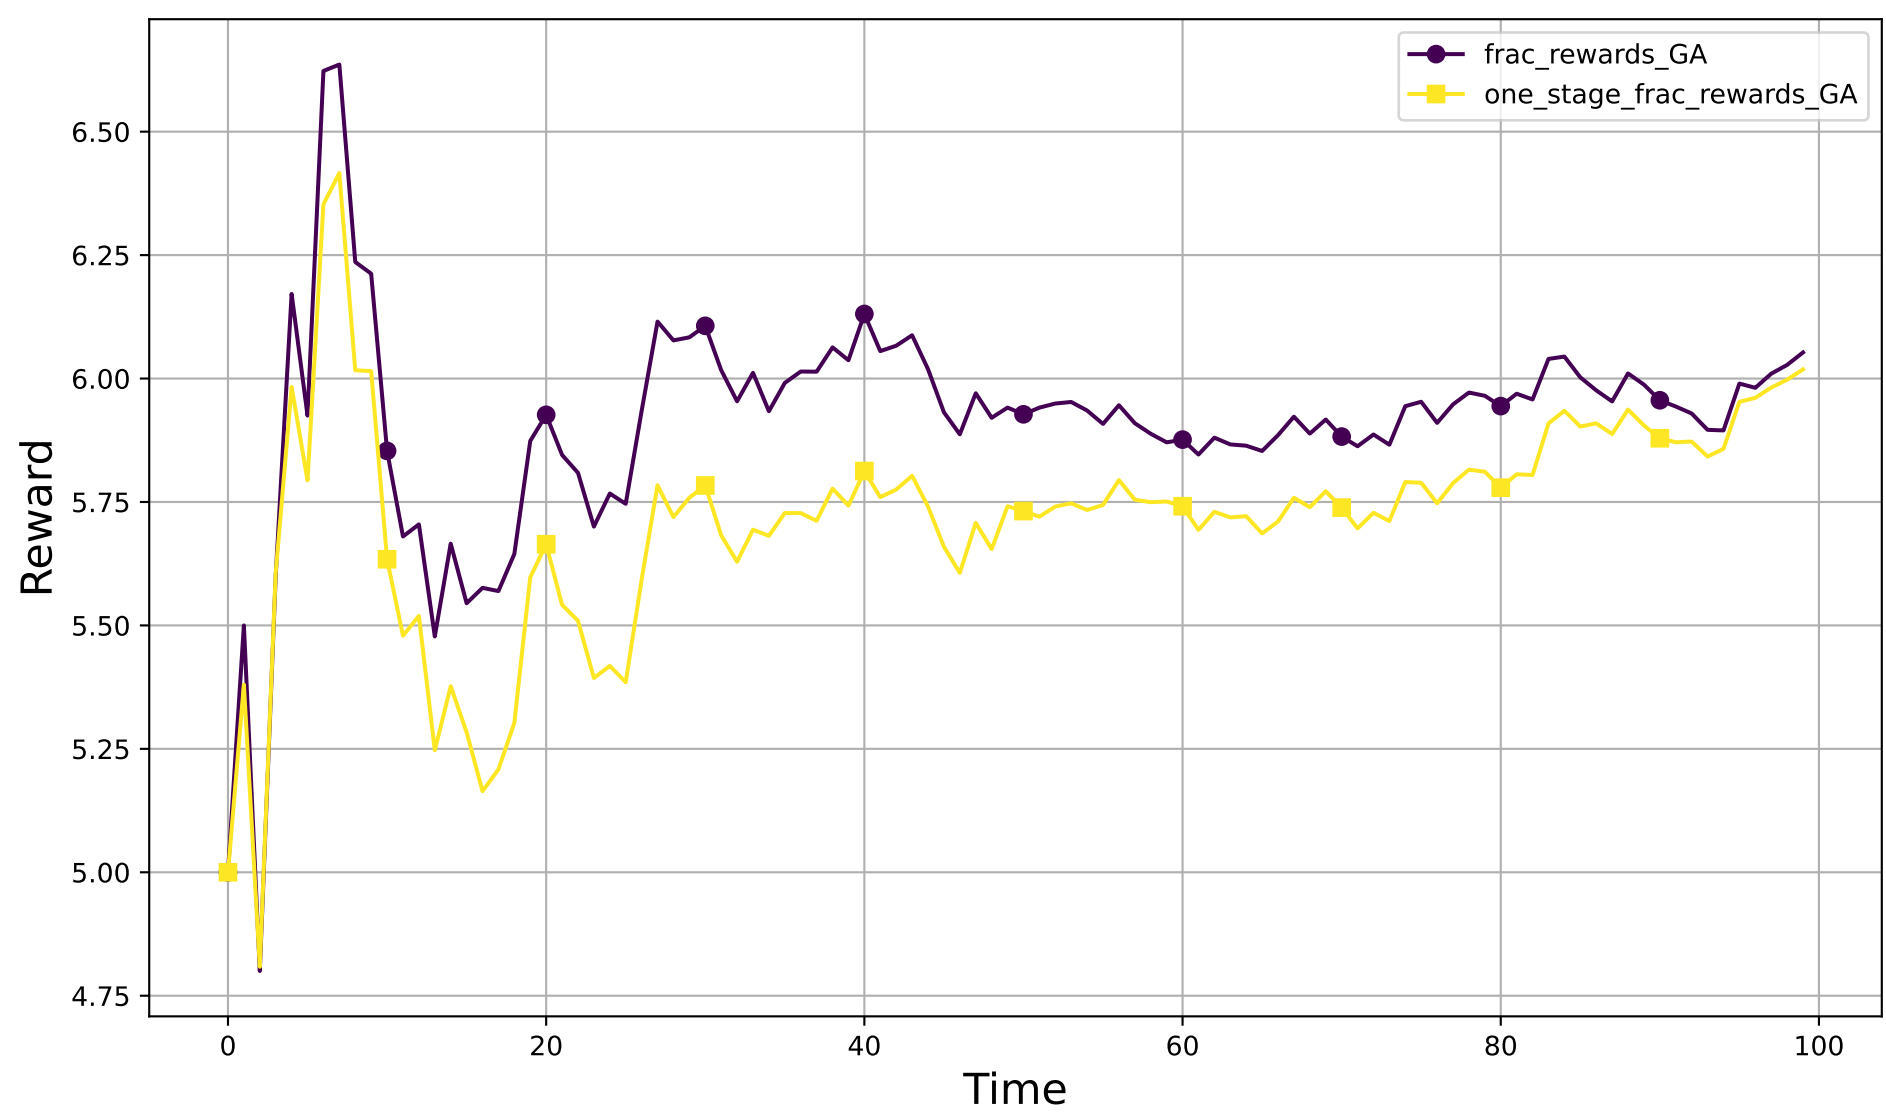

Supplement: Supplementary file 35 [file rewards_k2.pdf › online-two-stage-sub-max-main/online-two-stage-sub-max-experiments/plots/analysis/influence/rewards_k2.pdf]

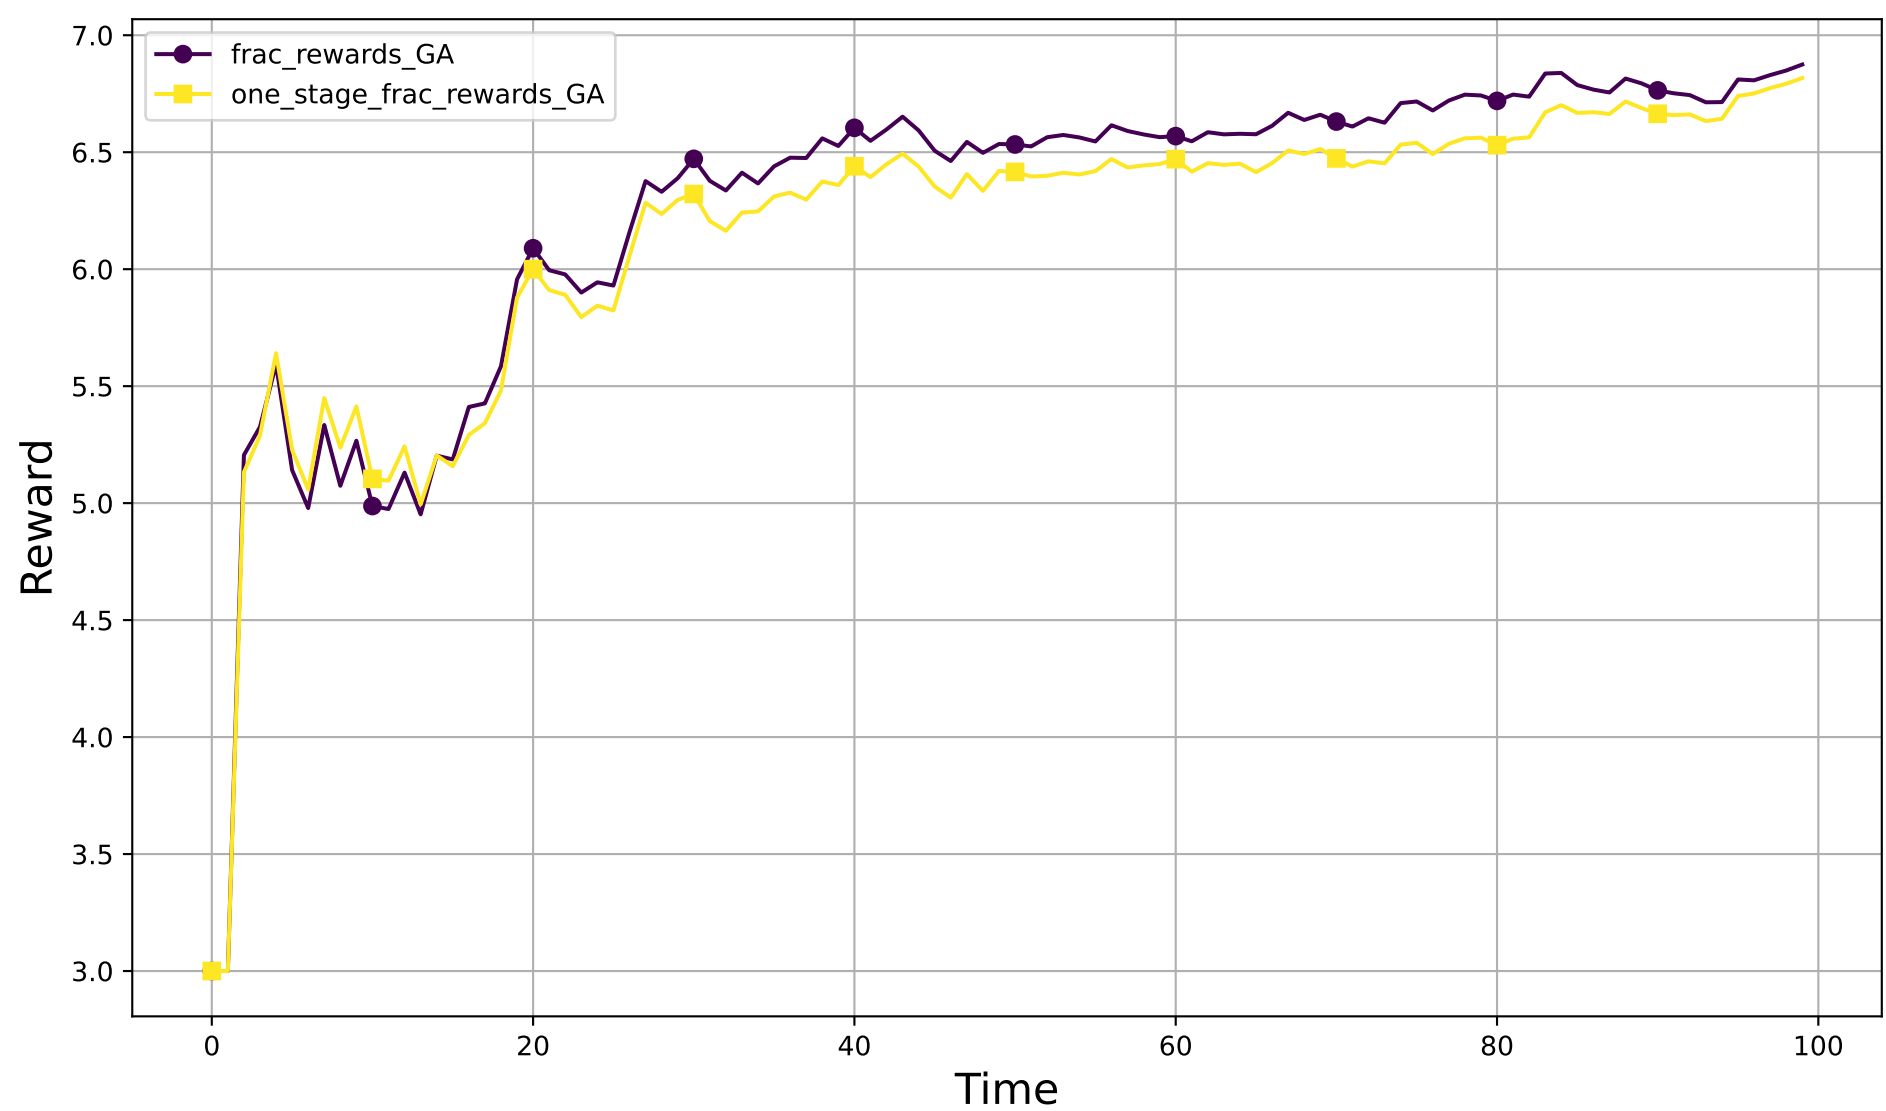

Supplement: Supplementary file 36 [file rewards_k3.pdf › online-two-stage-sub-max-main/online-two-stage-sub-max-experiments/plots/analysis/influence/rewards_k3.pdf]

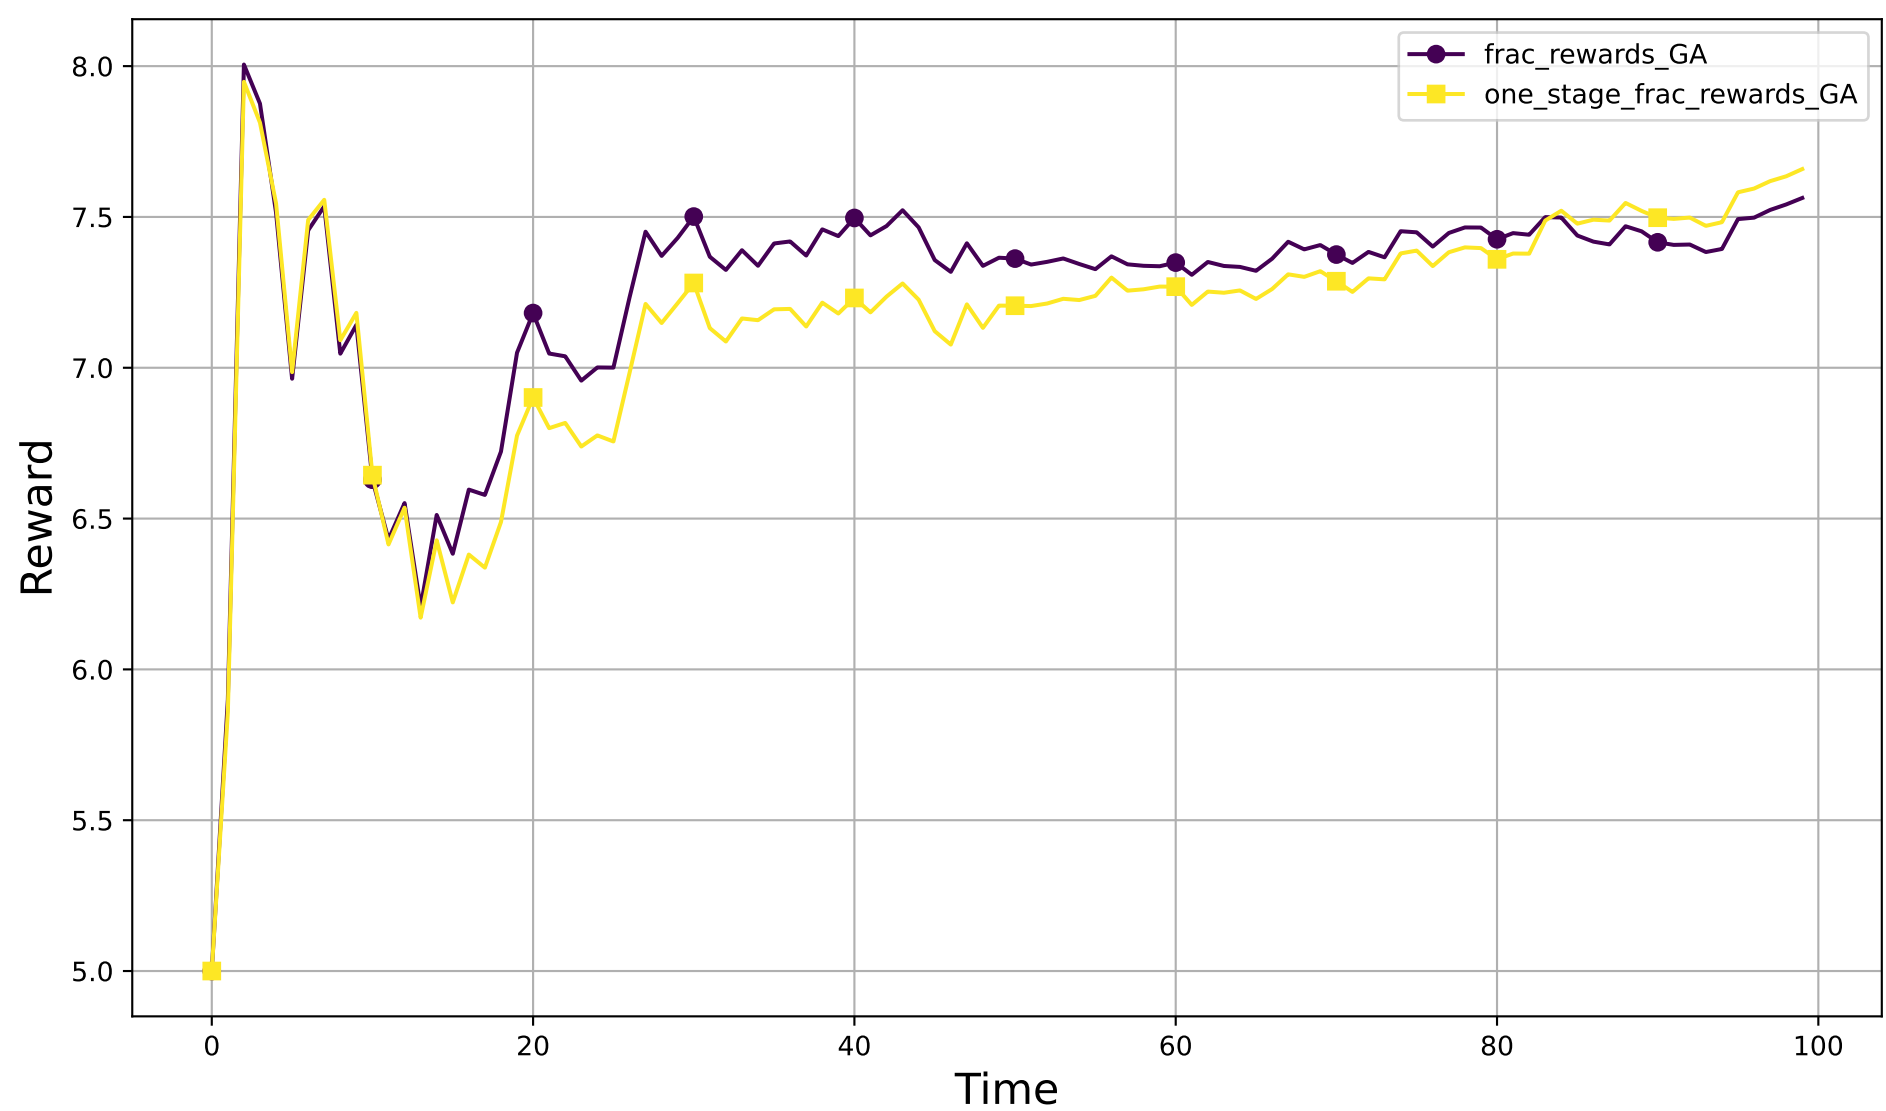

Supplement: Supplementary file 37 [file rewards_k4.pdf › online-two-stage-sub-max-main/online-two-stage-sub-max-experiments/plots/analysis/influence/rewards_k4.pdf]

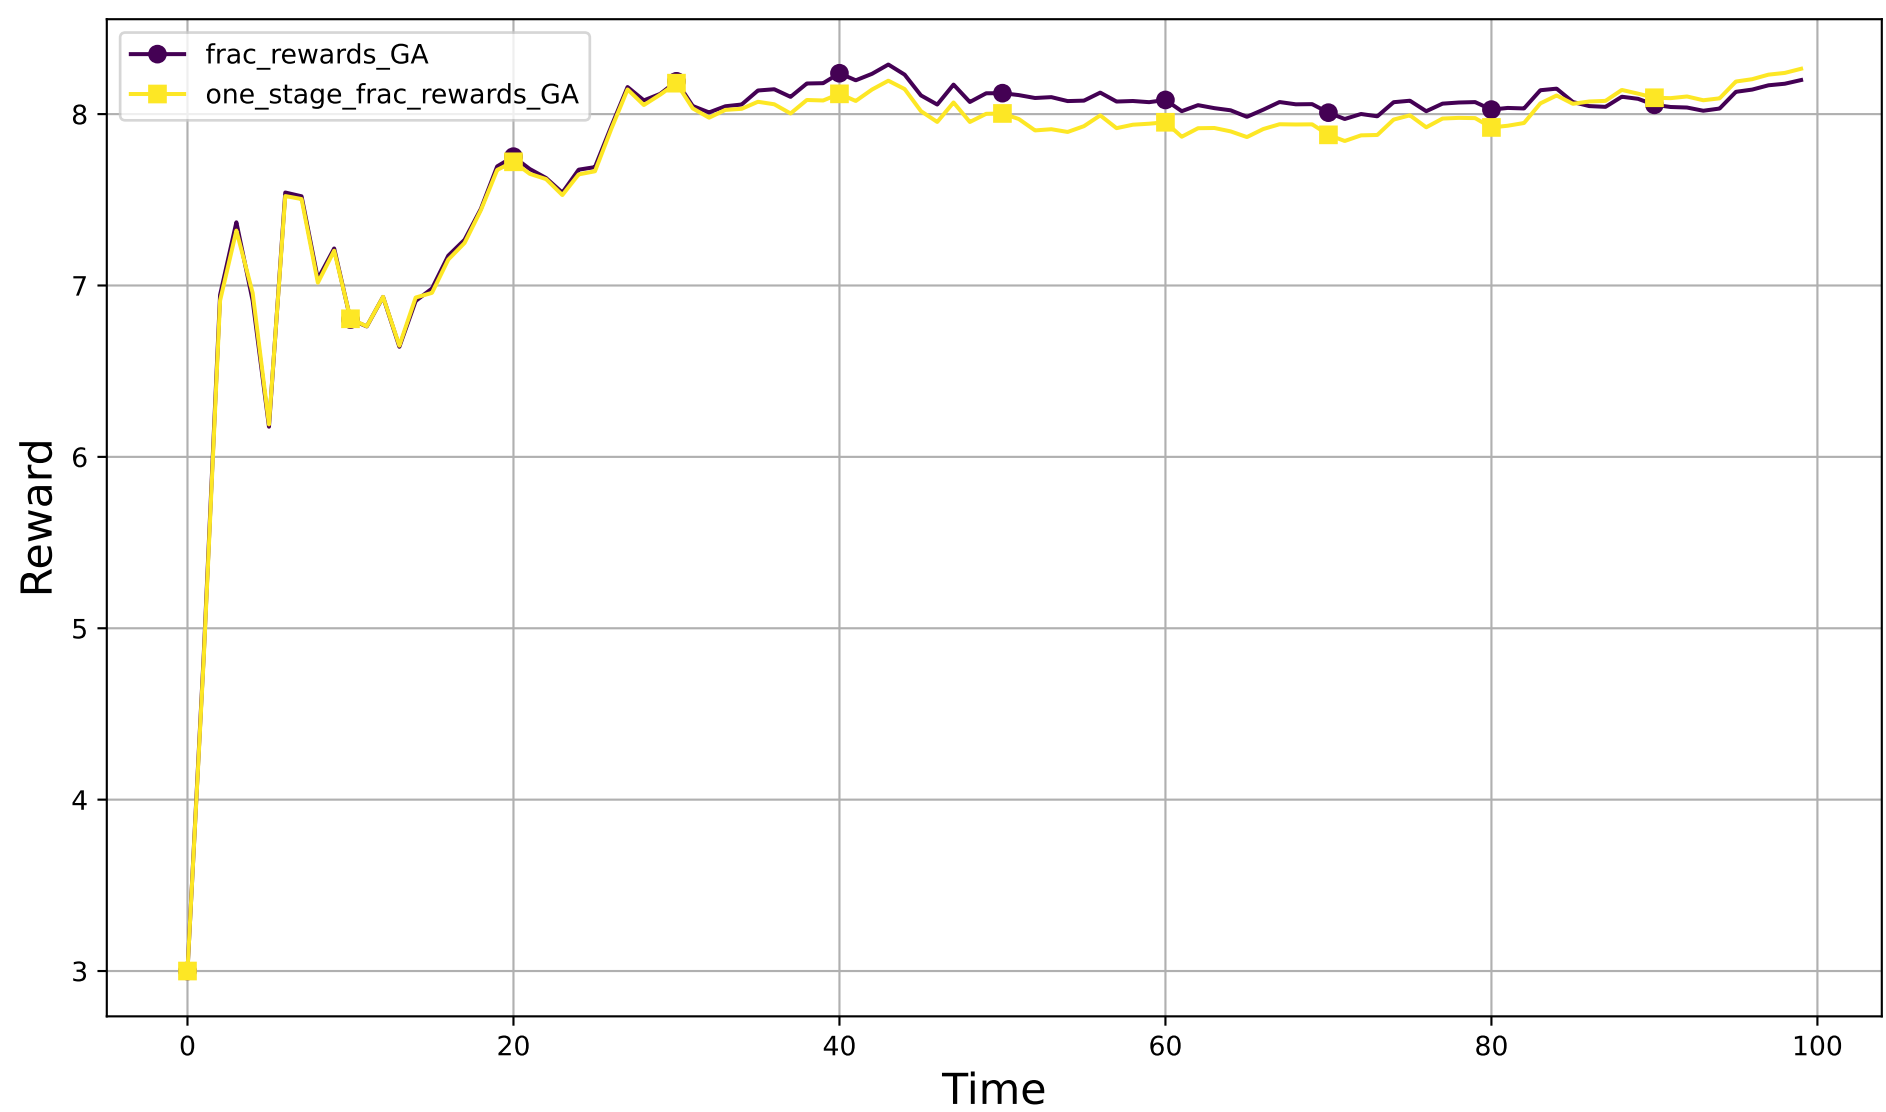

Supplement: Supplementary file 38 [file rewards_k5.pdf › online-two-stage-sub-max-main/online-two-stage-sub-max-experiments/plots/analysis/influence/rewards_k5.pdf]

Reward over Time (k = 6)

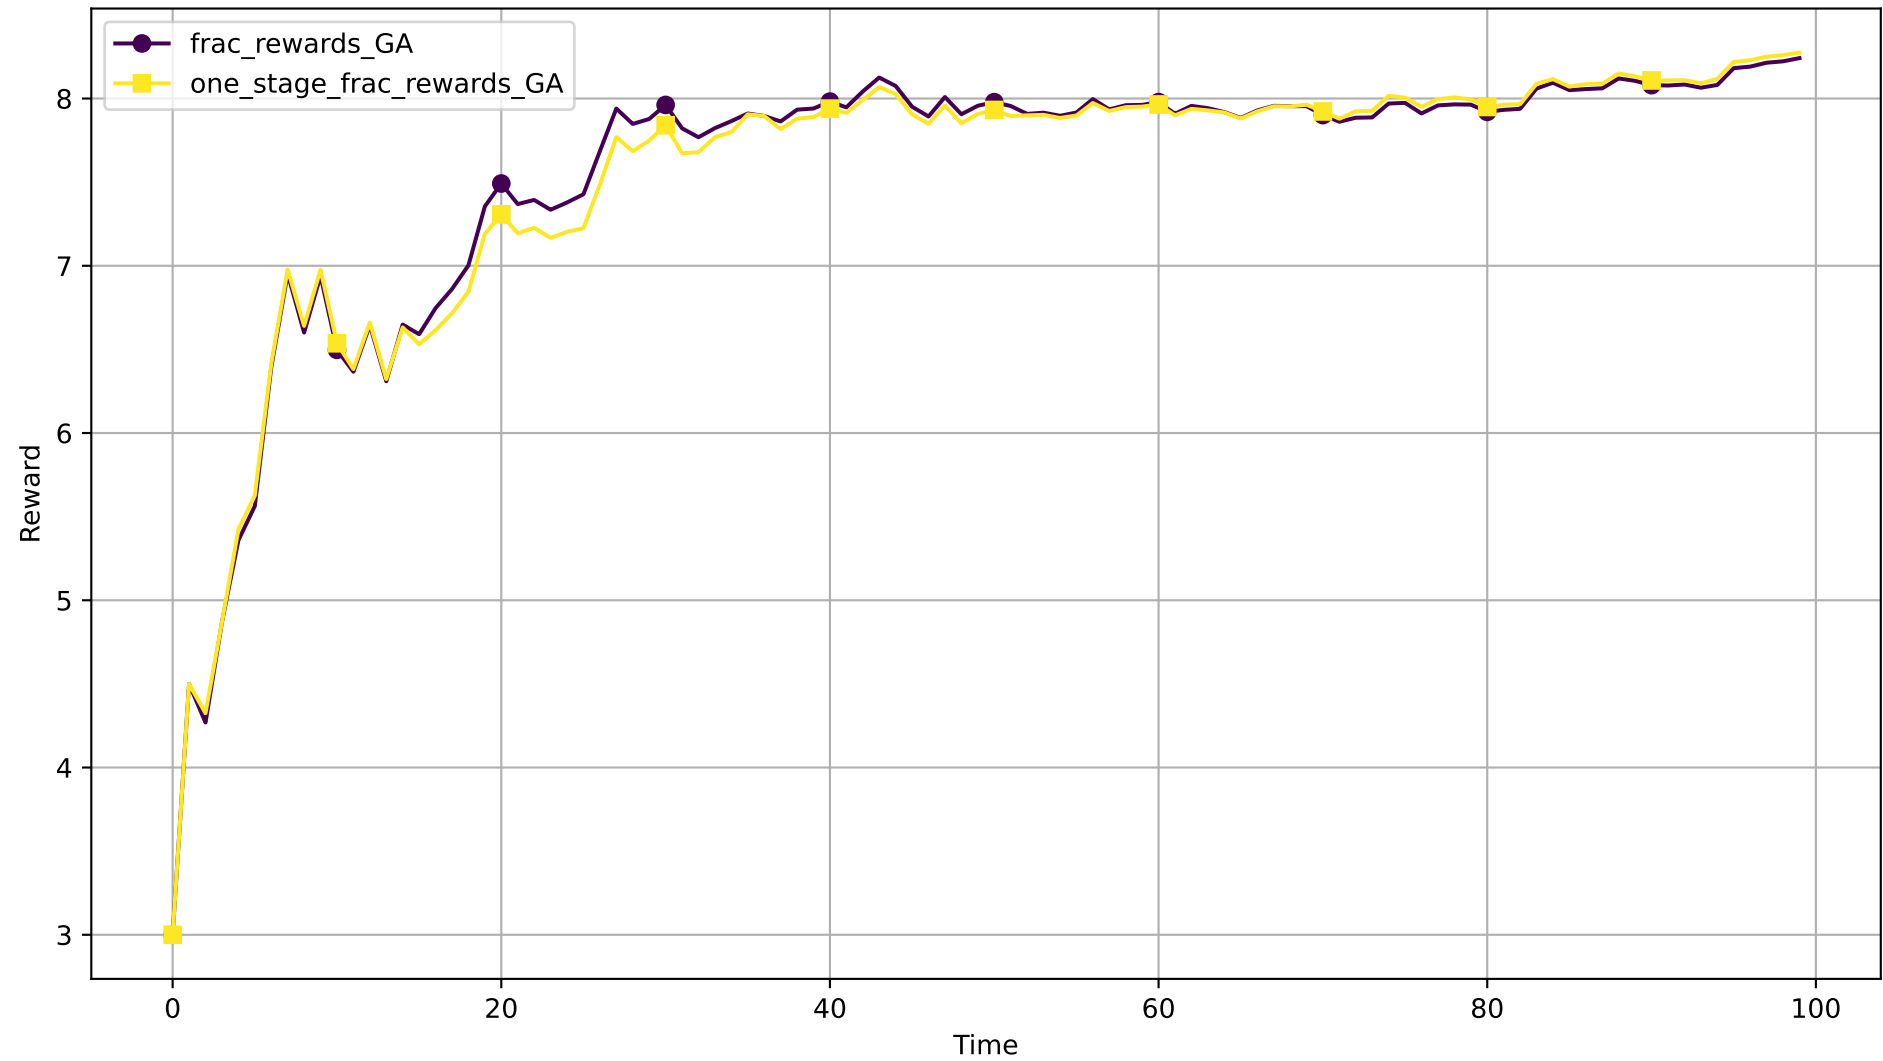

Supplement: Supplementary file 39 [file rewards_k6.pdf › online-two-stage-sub-max-main/online-two-stage-sub-max-experiments/plots/analysis/influence/rewards_k6.pdf]

Reward over Time (k = 7)

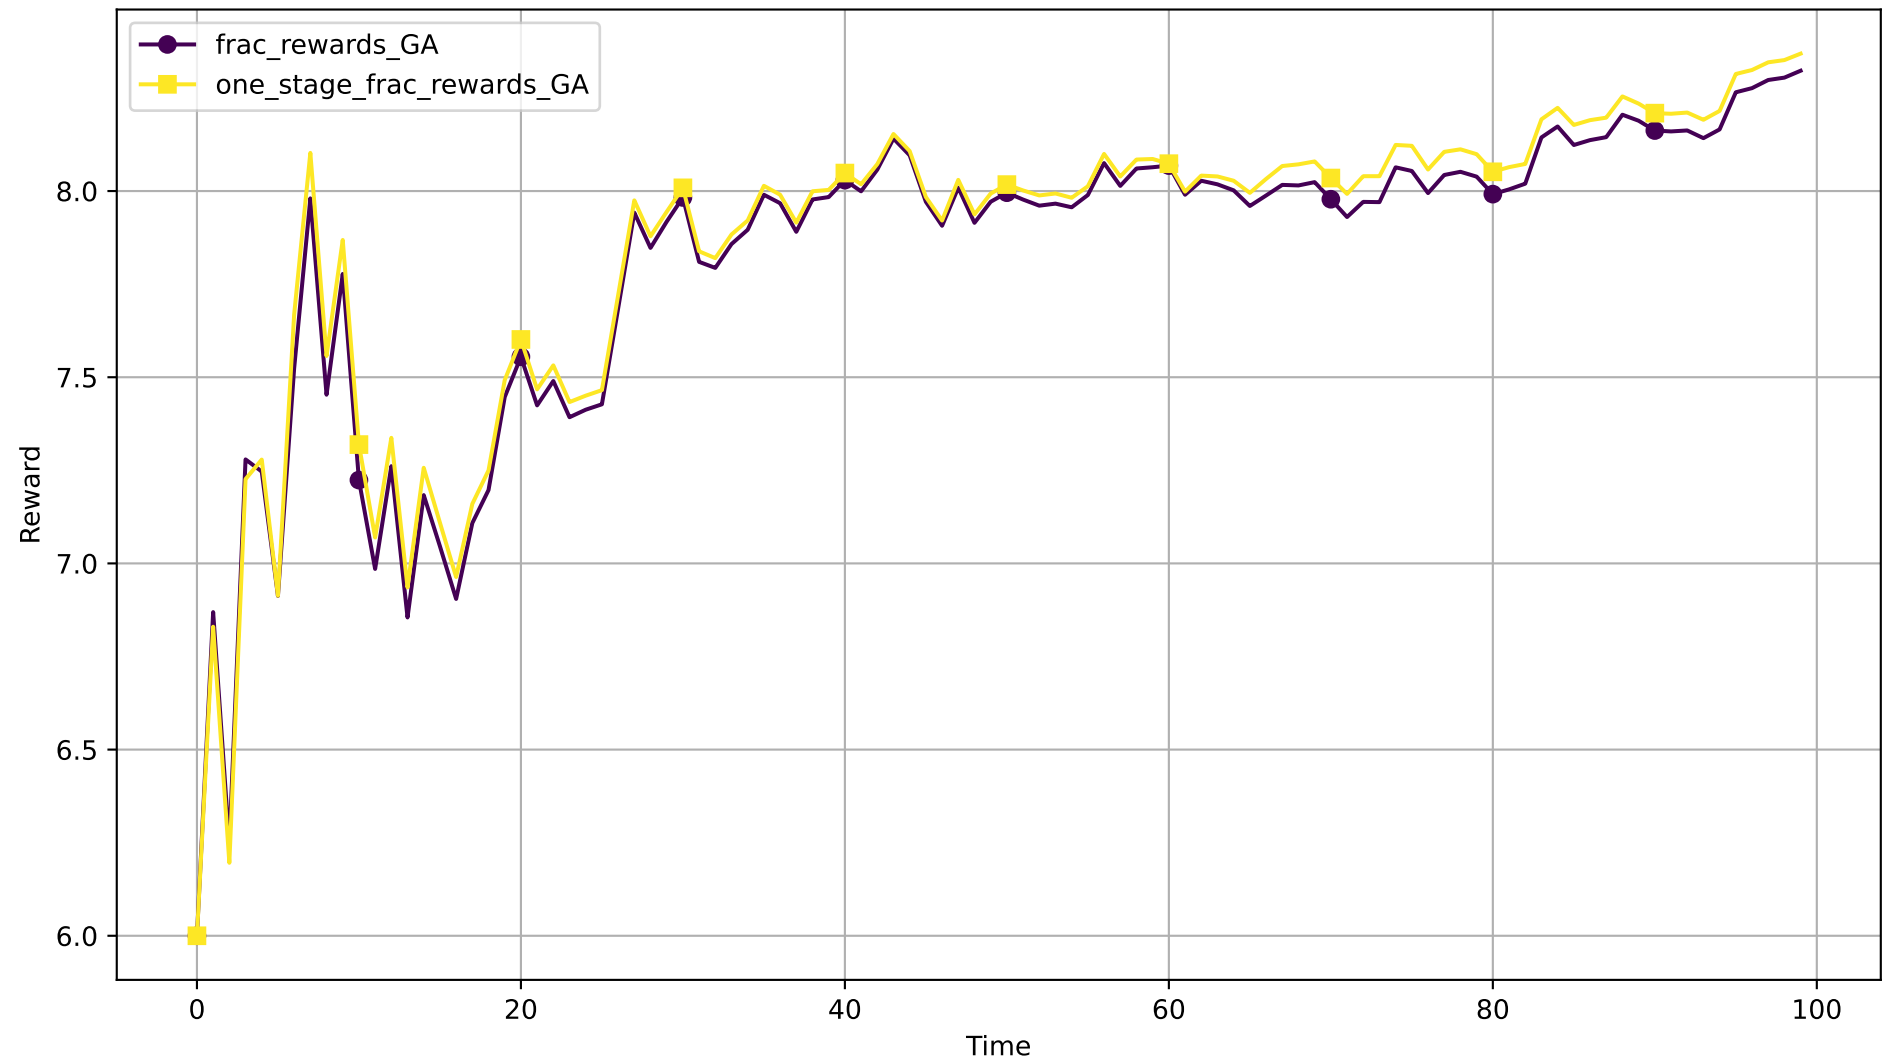

Supplement: Supplementary file 40 [file rewards_k7.pdf › online-two-stage-sub-max-main/online-two-stage-sub-max-experiments/plots/analysis/influence/rewards_k7.pdf]

Reward over Time (k = 8)

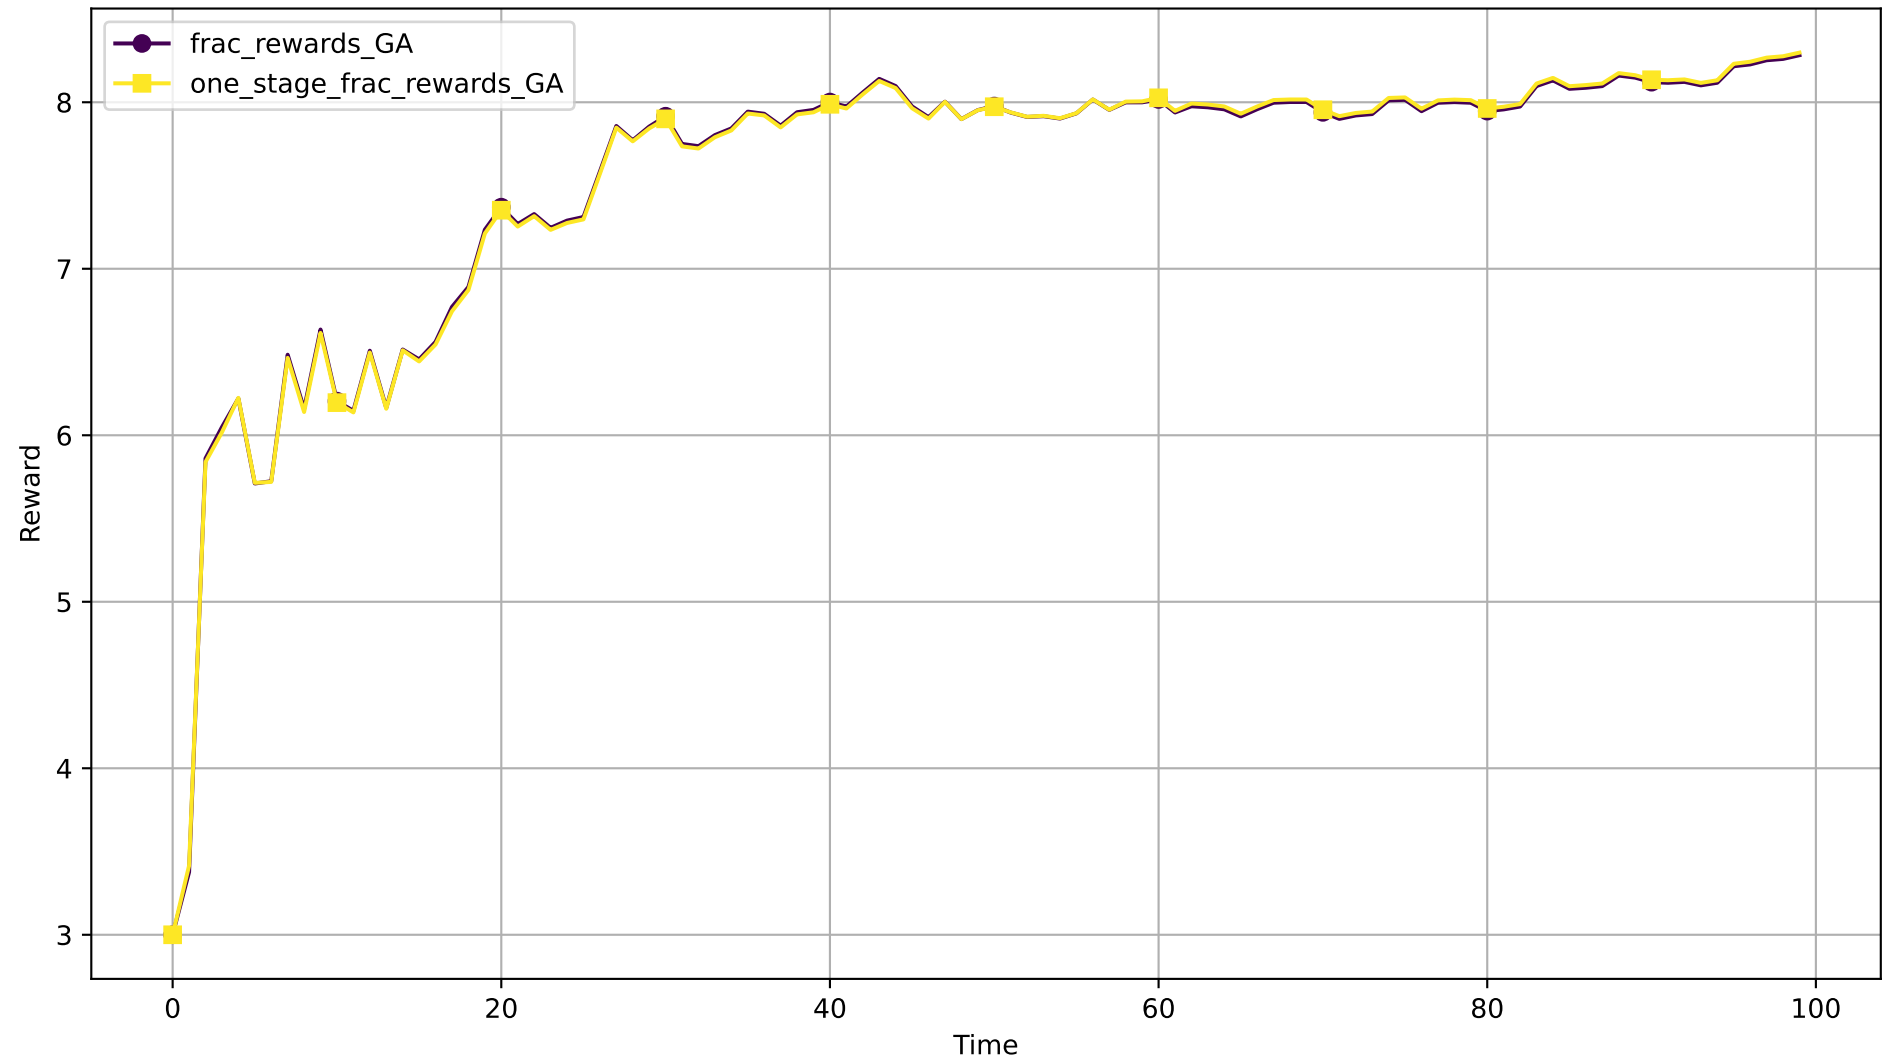

Supplement: Supplementary file 41 [file rewards_k8.pdf › online-two-stage-sub-max-main/online-two-stage-sub-max-experiments/plots/analysis/influence/rewards_k8.pdf]

Distribution of Potential Weights

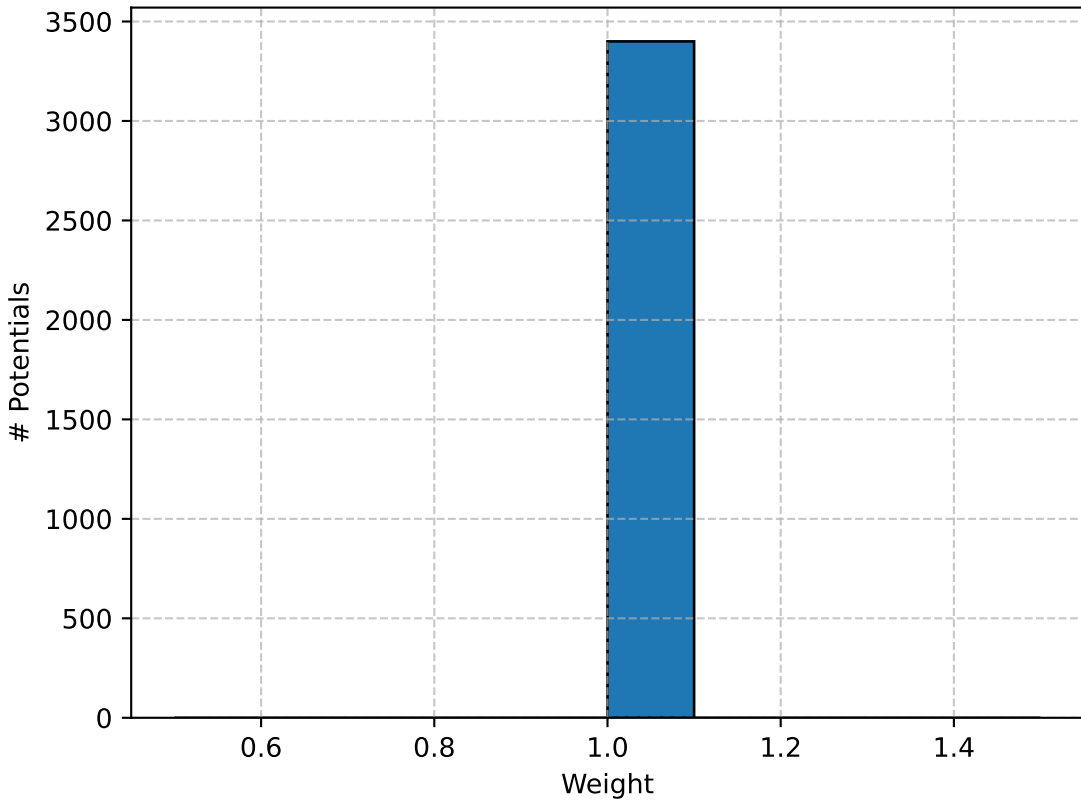

Supplement: Supplementary file 42 [file wtp_weights_dist.pdf › online-two-stage-sub-max-main/online-two-stage-sub-max-experiments/plots/analysis/influence/wtp_weights_dist.pdf]

Distribution of Potential Weights



Supplement: Supplementary file 43 [file wtp_weights_dist_influence.pdf › online-two-stage-sub-max-main/online-two-stage-sub-max-experiments/plots/analysis/influence/wtp_weights_dist_influence.pdf]

k vs Average Jaccard Distance of Optimal Solutions

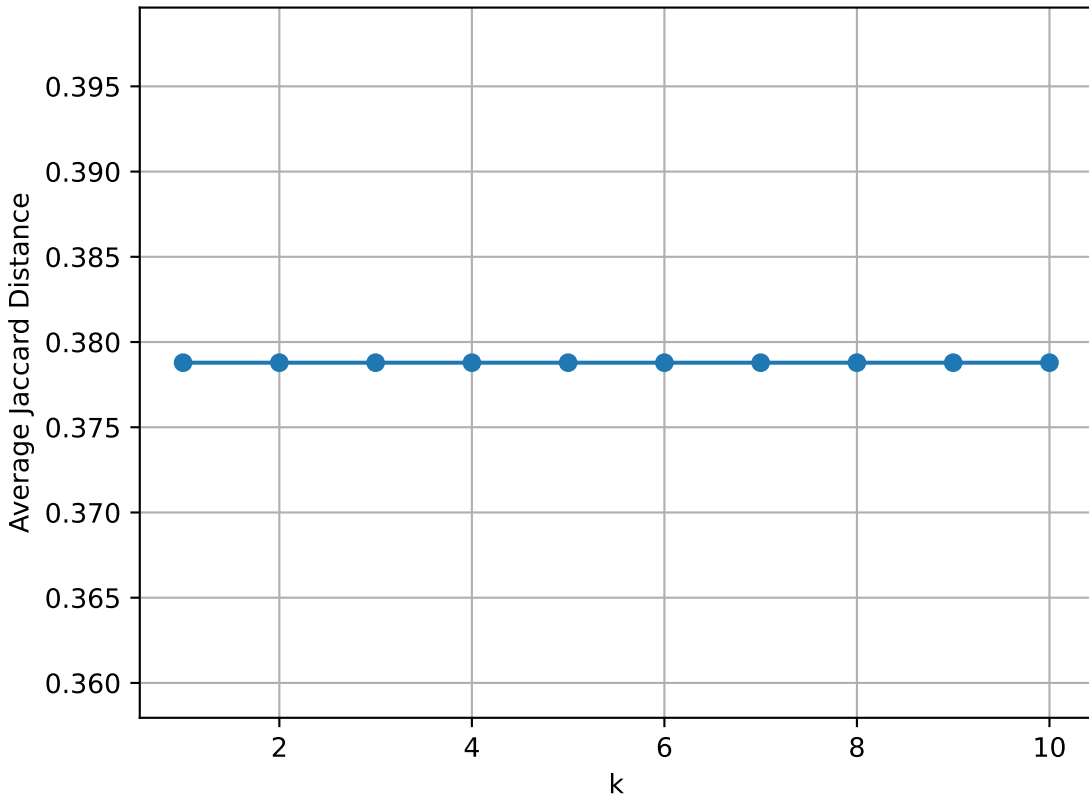

Supplement: Supplementary file 44 [file JD.pdf › online-two-stage-sub-max-main/online-two-stage-sub-max-experiments/plots/analysis/movies/JD.pdf]

Average Jaccard Distance

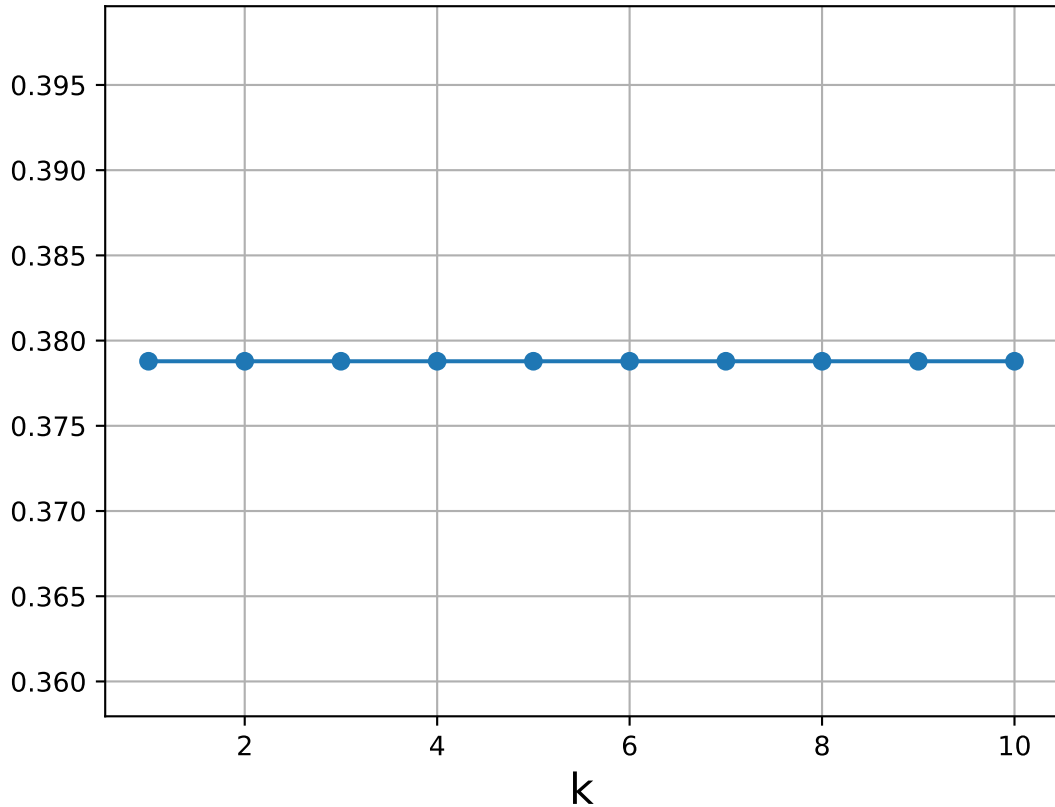

Supplement: Supplementary file 45 [file JD_movies.pdf › online-two-stage-sub-max-main/online-two-stage-sub-max-experiments/plots/analysis/movies/JD_movies.pdf]

Average Reward vs Average Jaccard Distance (movies)

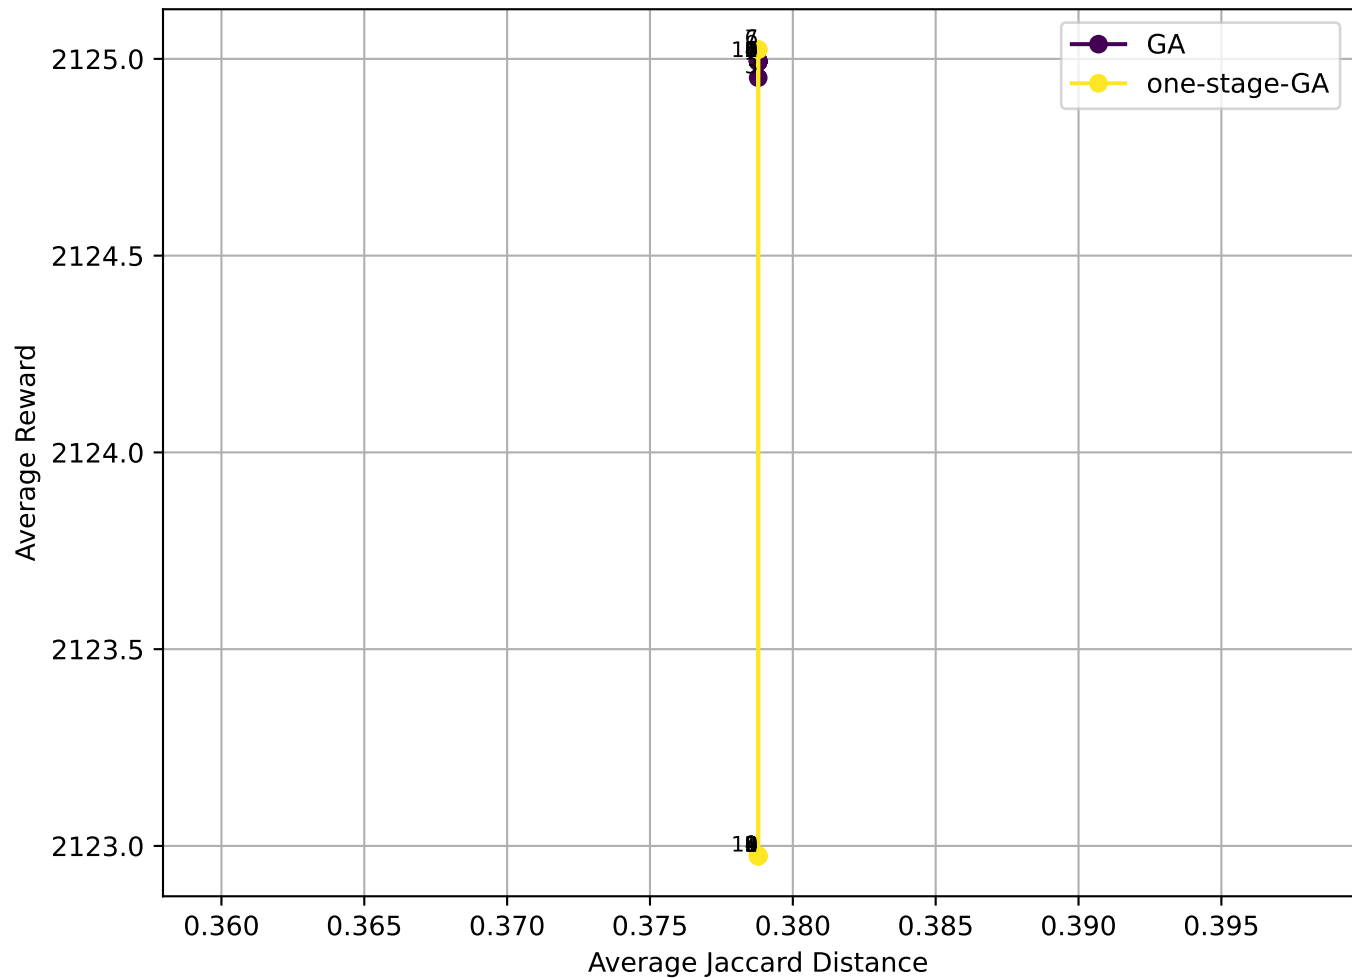

Supplement: Supplementary file 46 [file reward_vs_JD.pdf › online-two-stage-sub-max-main/online-two-stage-sub-max-experiments/plots/analysis/movies/reward_vs_JD.pdf]

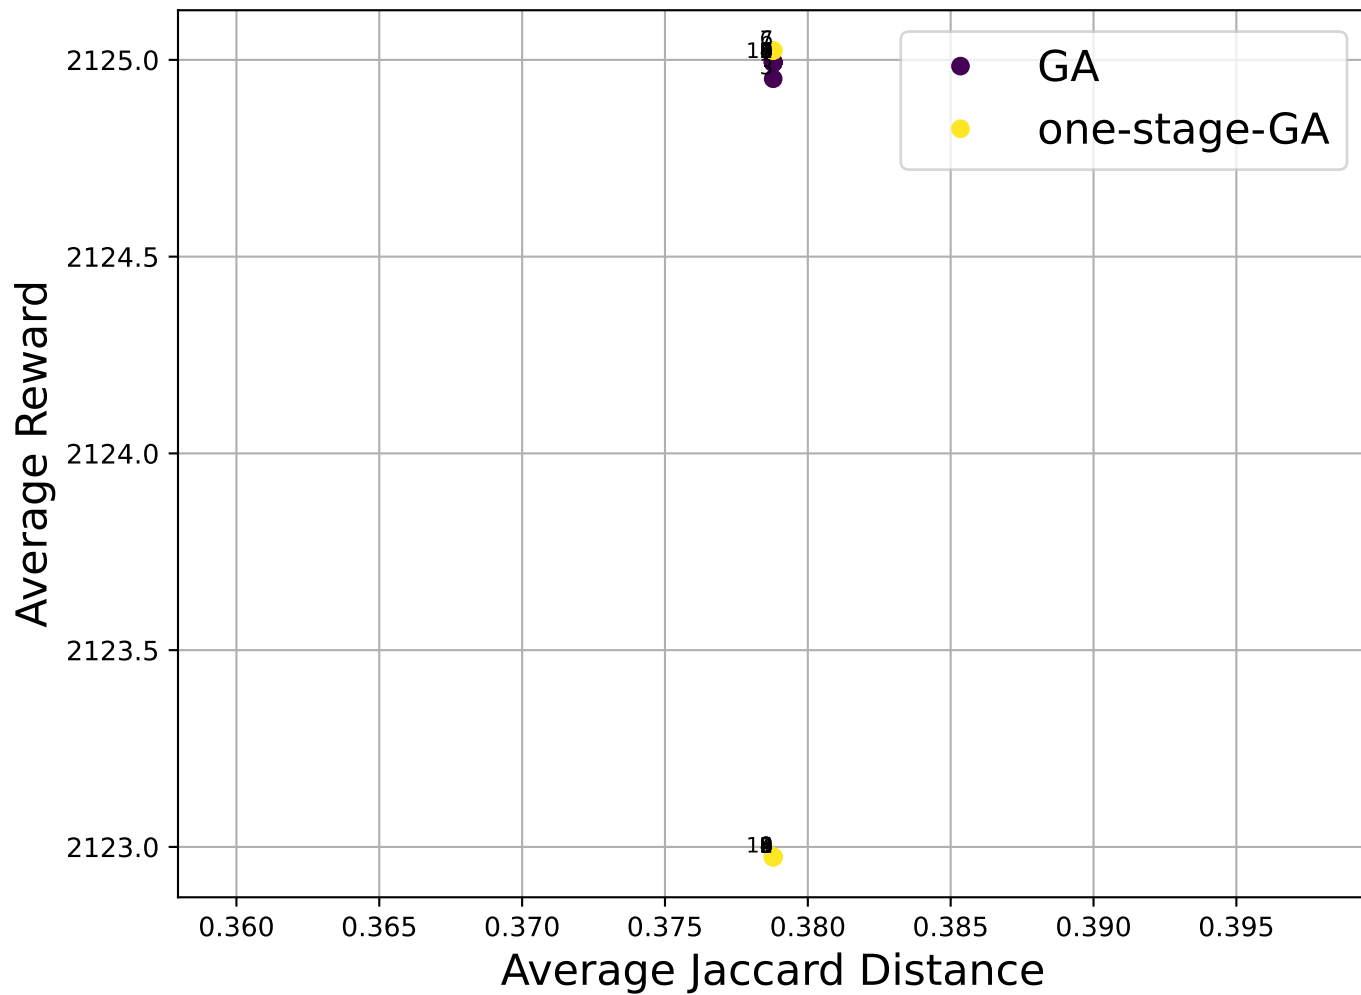

Supplement: Supplementary file 47 [file reward_vs_JD_movies.pdf › online-two-stage-sub-max-main/online-two-stage-sub-max-experiments/plots/analysis/movies/reward_vs_JD_movies.pdf]

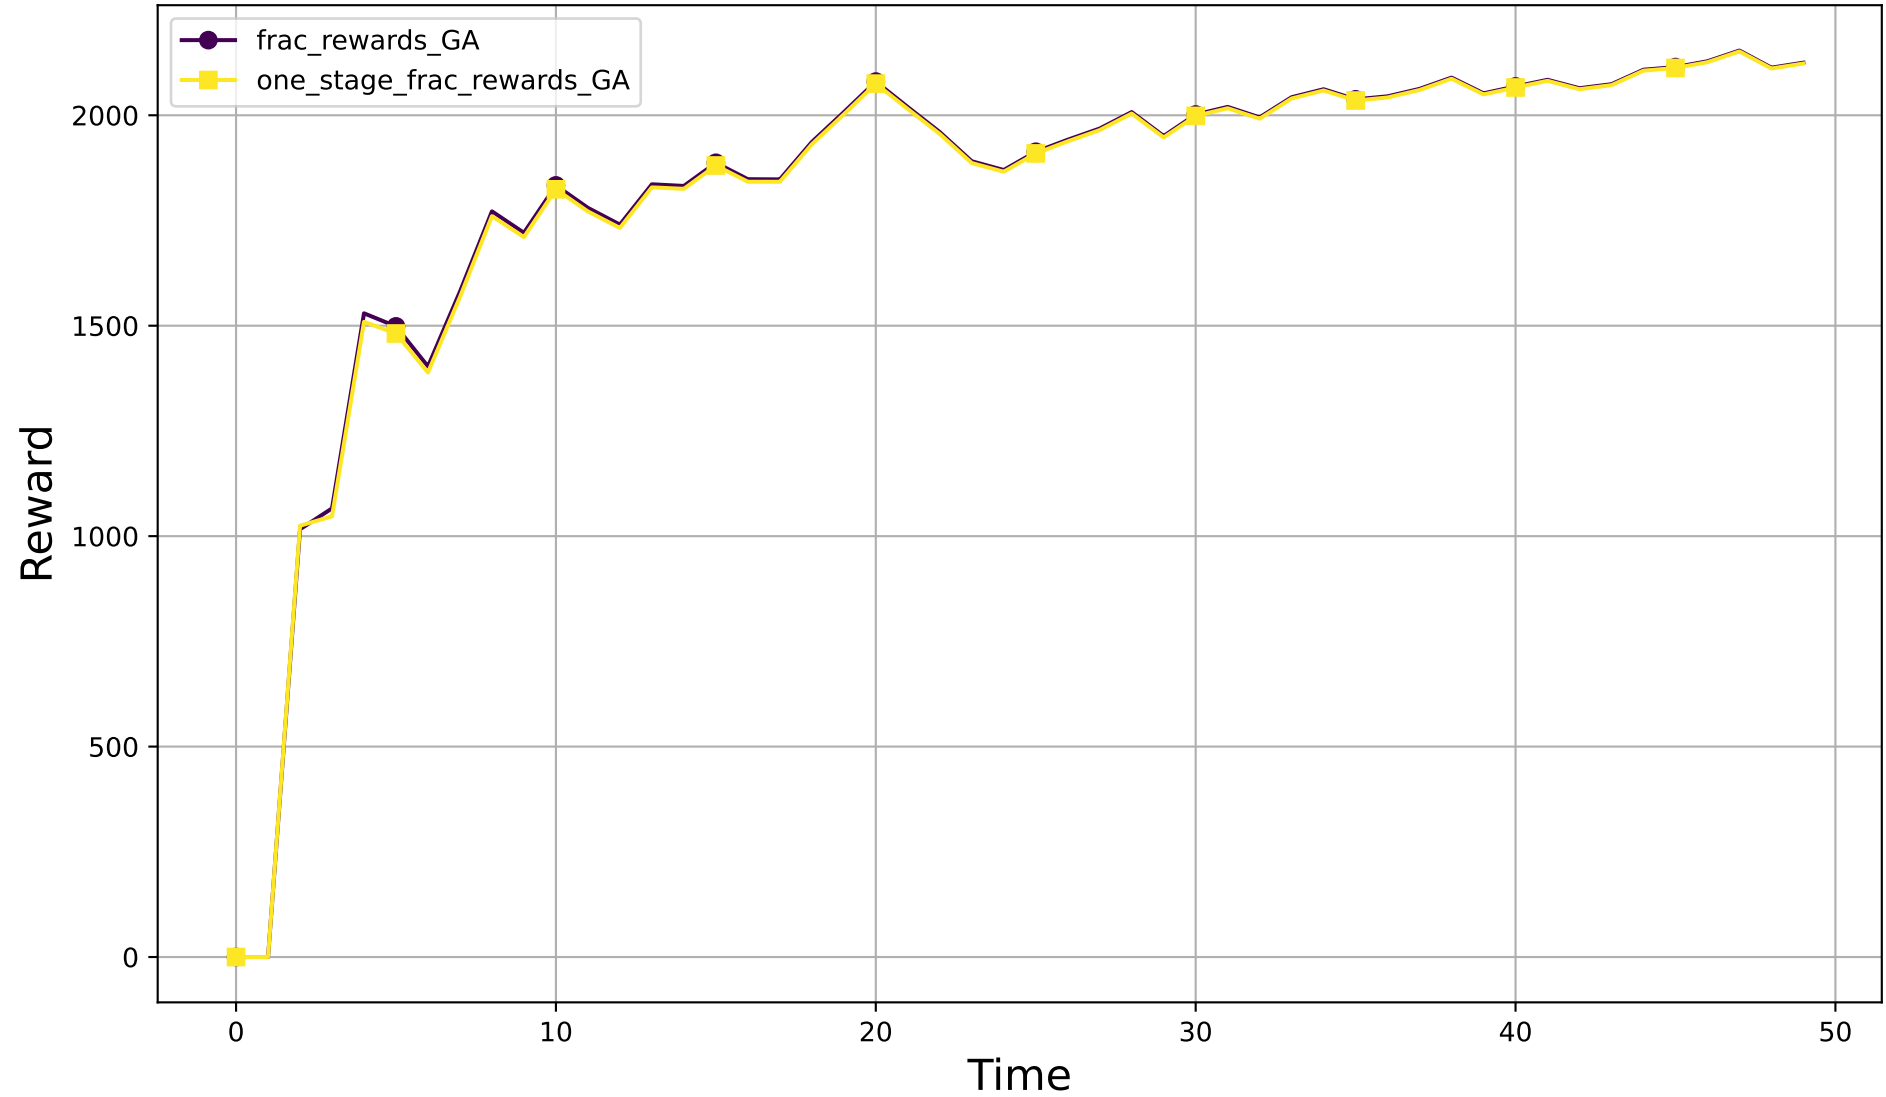

Supplement: Supplementary file 48 [file rewards_k1.pdf › online-two-stage-sub-max-main/online-two-stage-sub-max-experiments/plots/analysis/movies/rewards_k1.pdf]

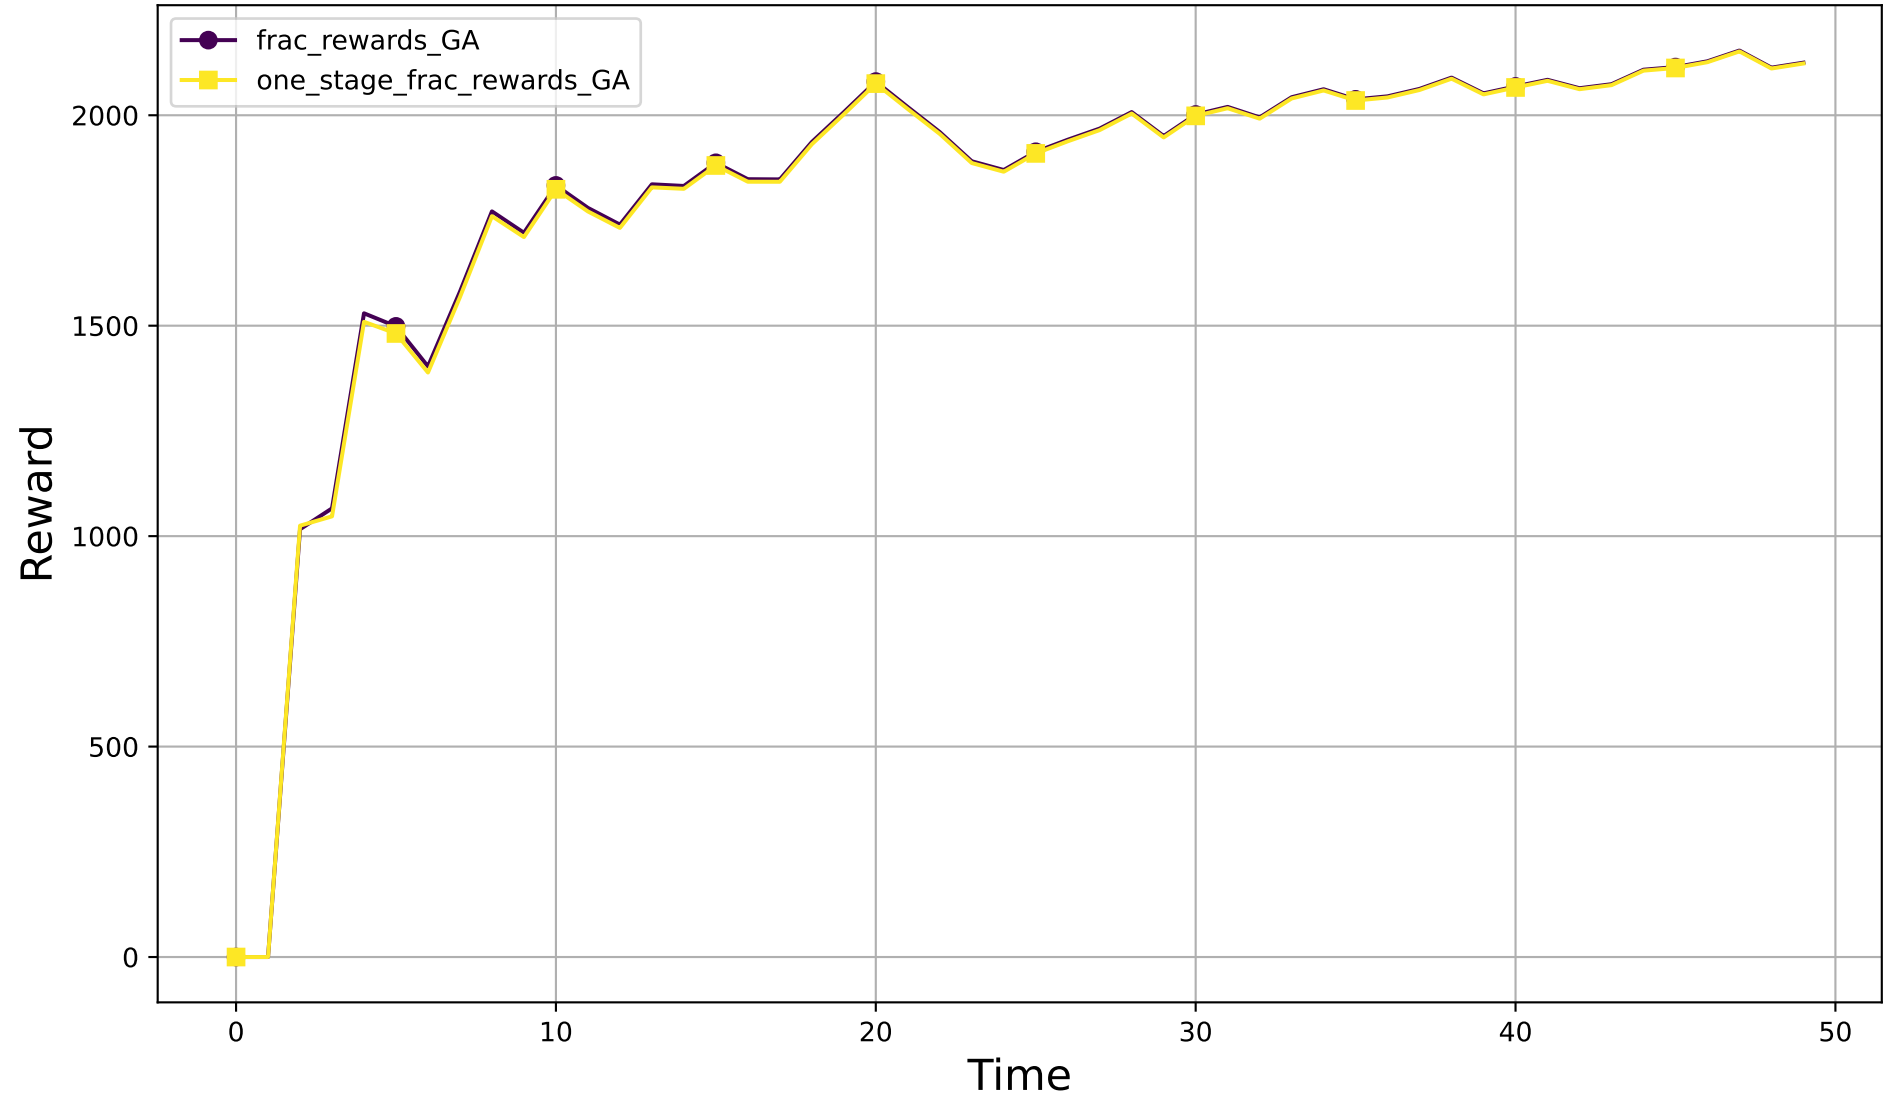

Supplement: Supplementary file 49 [file rewards_k3.pdf › online-two-stage-sub-max-main/online-two-stage-sub-max-experiments/plots/analysis/movies/rewards_k3.pdf]



Supplement: Supplementary file 50 [file rewards_k4.pdf › online-two-stage-sub-max-main/online-two-stage-sub-max-experiments/plots/analysis/movies/rewards_k4.pdf]

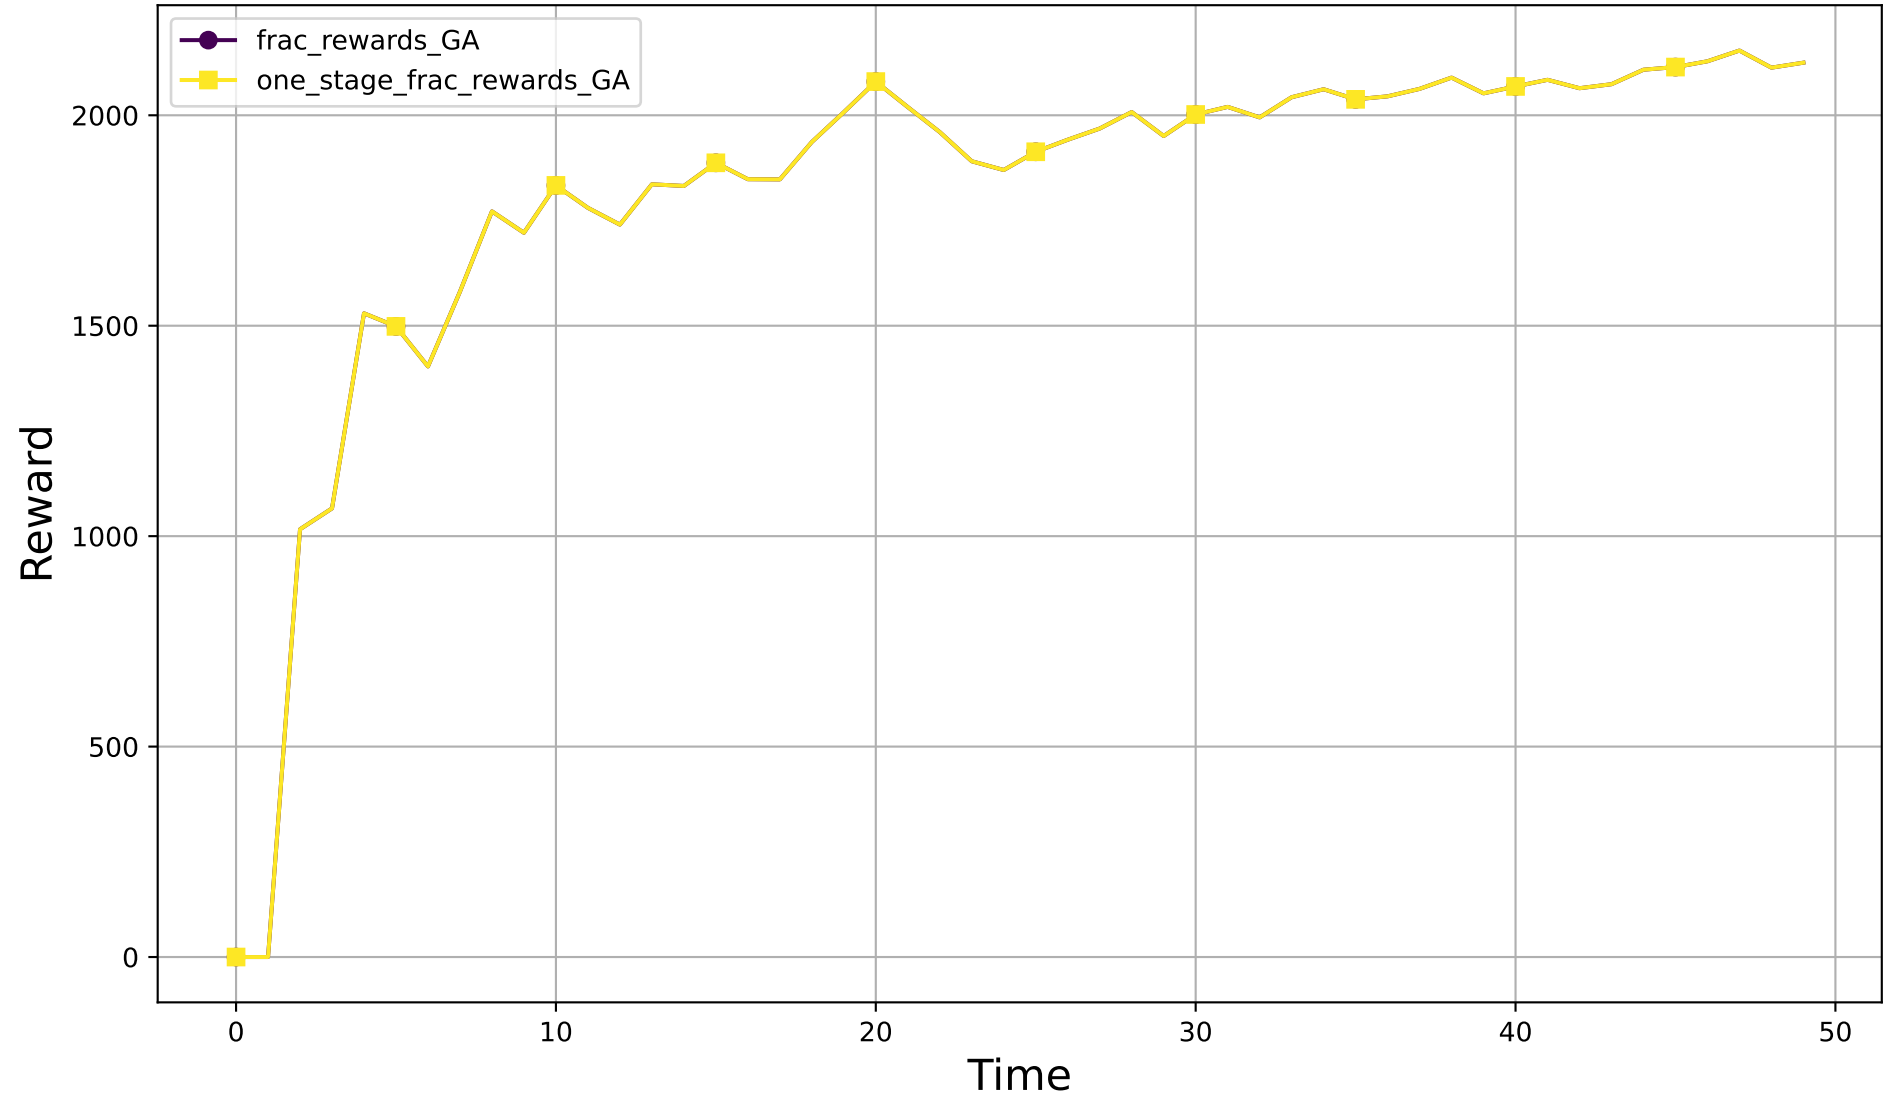

Supplement: Supplementary file 51 [file rewards_k6.pdf › online-two-stage-sub-max-main/online-two-stage-sub-max-experiments/plots/analysis/movies/rewards_k6.pdf]



Supplement: Supplementary file 52 [file rewards_k7.pdf › online-two-stage-sub-max-main/online-two-stage-sub-max-experiments/plots/analysis/movies/rewards_k7.pdf]



Supplement: Supplementary file 53 [file rewards_k8.pdf › online-two-stage-sub-max-main/online-two-stage-sub-max-experiments/plots/analysis/movies/rewards_k8.pdf]



Supplement: Supplementary file 54 [file rewards_k9.pdf › online-two-stage-sub-max-main/online-two-stage-sub-max-experiments/plots/analysis/movies/rewards_k9.pdf]

Distribution of Potential Weights

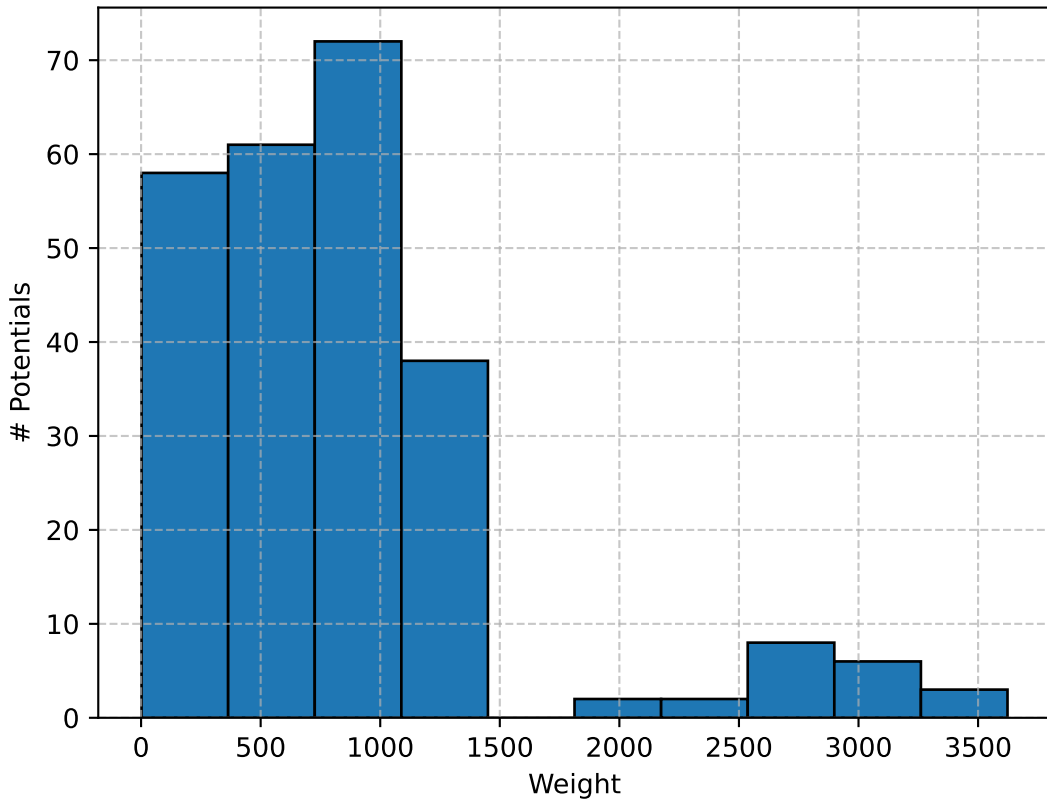

Supplement: Supplementary file 55 [file wtp_weights_dist.pdf › online-two-stage-sub-max-main/online-two-stage-sub-max-experiments/plots/analysis/movies/wtp_weights_dist.pdf]

Distribution of Potential Weights



Supplement: Supplementary file 56 [file wtp_weights_dist_movies.pdf › online-two-stage-sub-max-main/online-two-stage-sub-max-experiments/plots/analysis/movies/wtp_weights_dist_movies.pdf]

k vs Average Jaccard Distance of Optimal Solutions

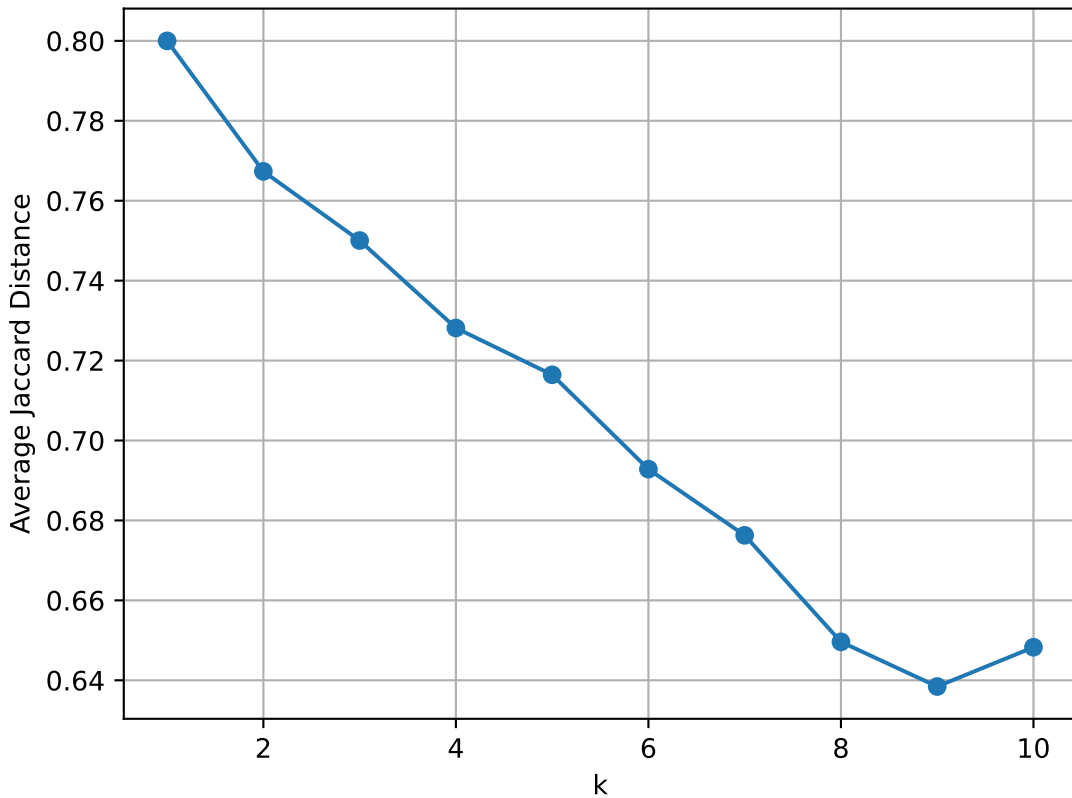

Supplement: Supplementary file 57 [file JD.pdf › online-two-stage-sub-max-main/online-two-stage-sub-max-experiments/plots/analysis/teamformation/JD.pdf]

Average Jaccard Distance

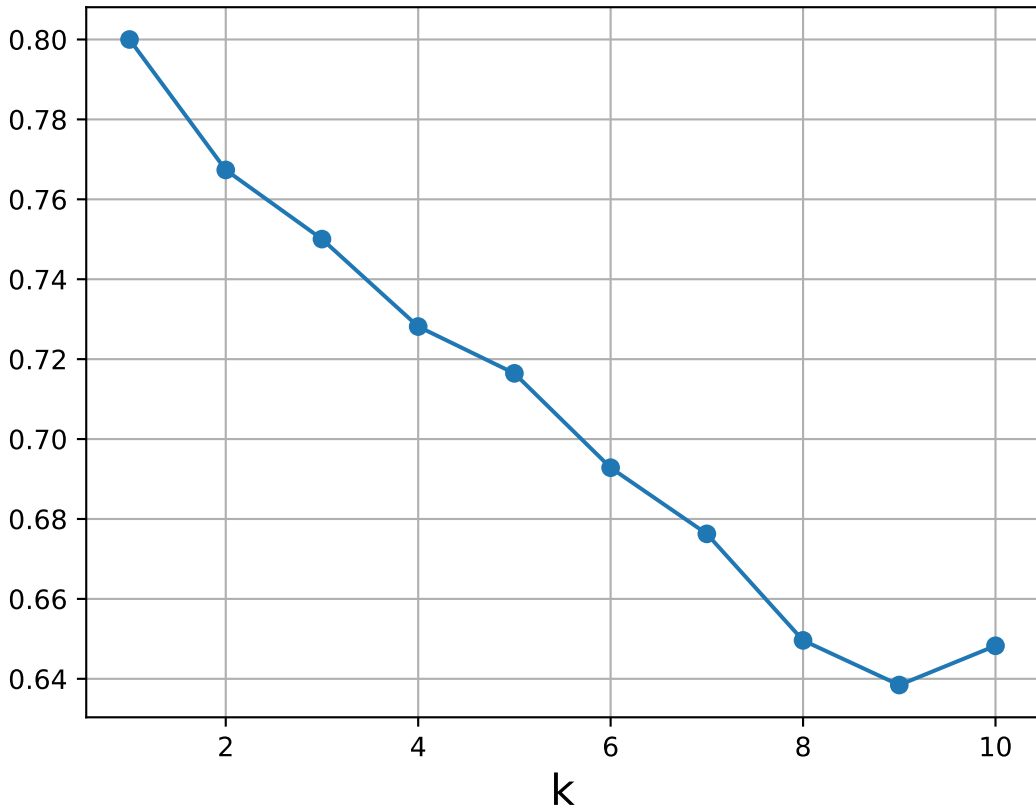

Supplement: Supplementary file 58 [file JD_teamformation.pdf › online-two-stage-sub-max-main/online-two-stage-sub-max-experiments/plots/analysis/teamformation/JD_teamformation.pdf]

Average Reward vs Average Jaccard Distance (teamformation)

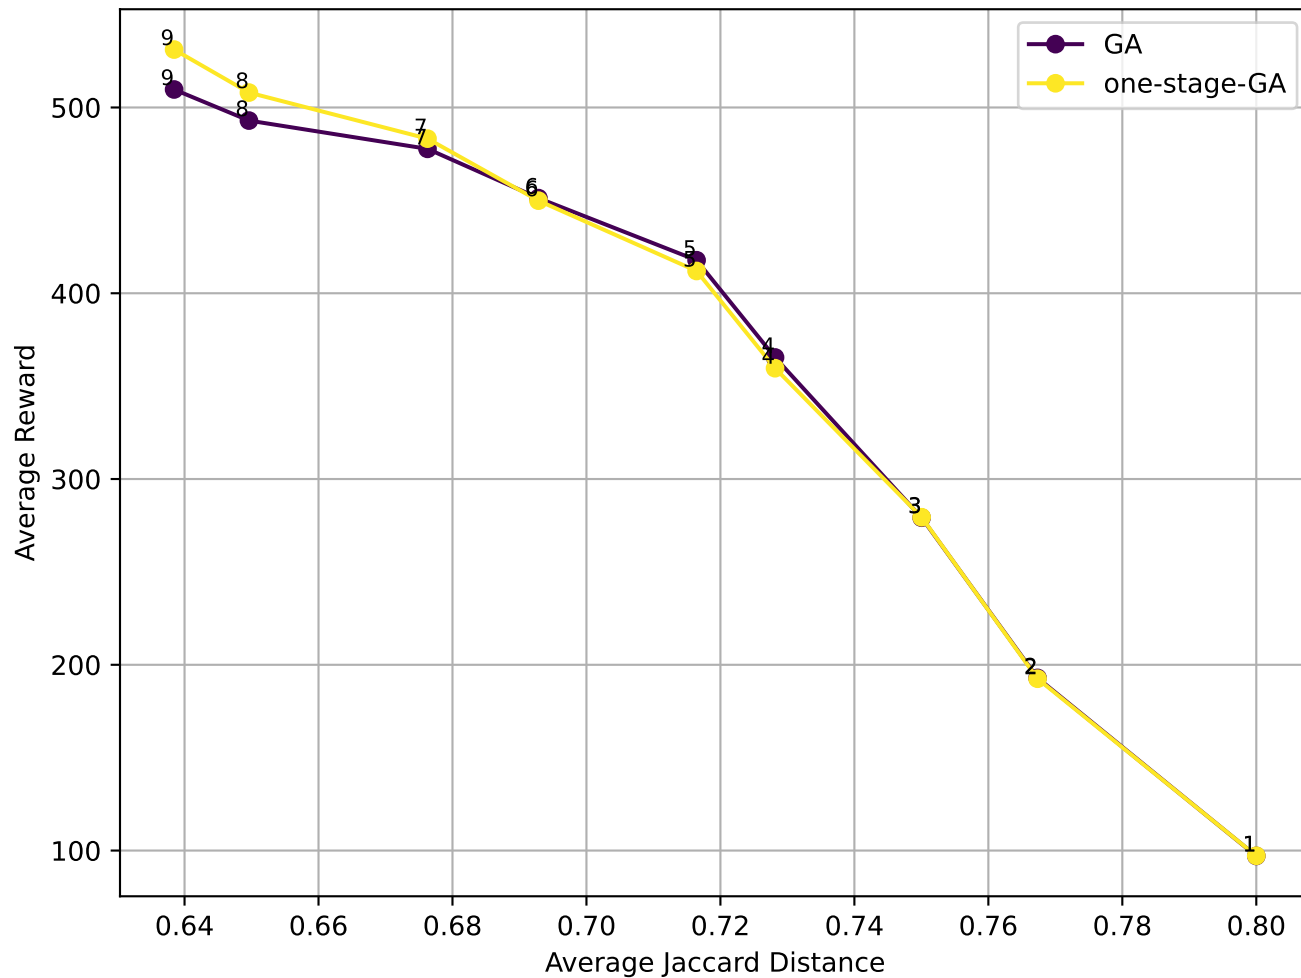

Supplement: Supplementary file 59 [file reward_vs_JD.pdf › online-two-stage-sub-max-main/online-two-stage-sub-max-experiments/plots/analysis/teamformation/reward_vs_JD.pdf]

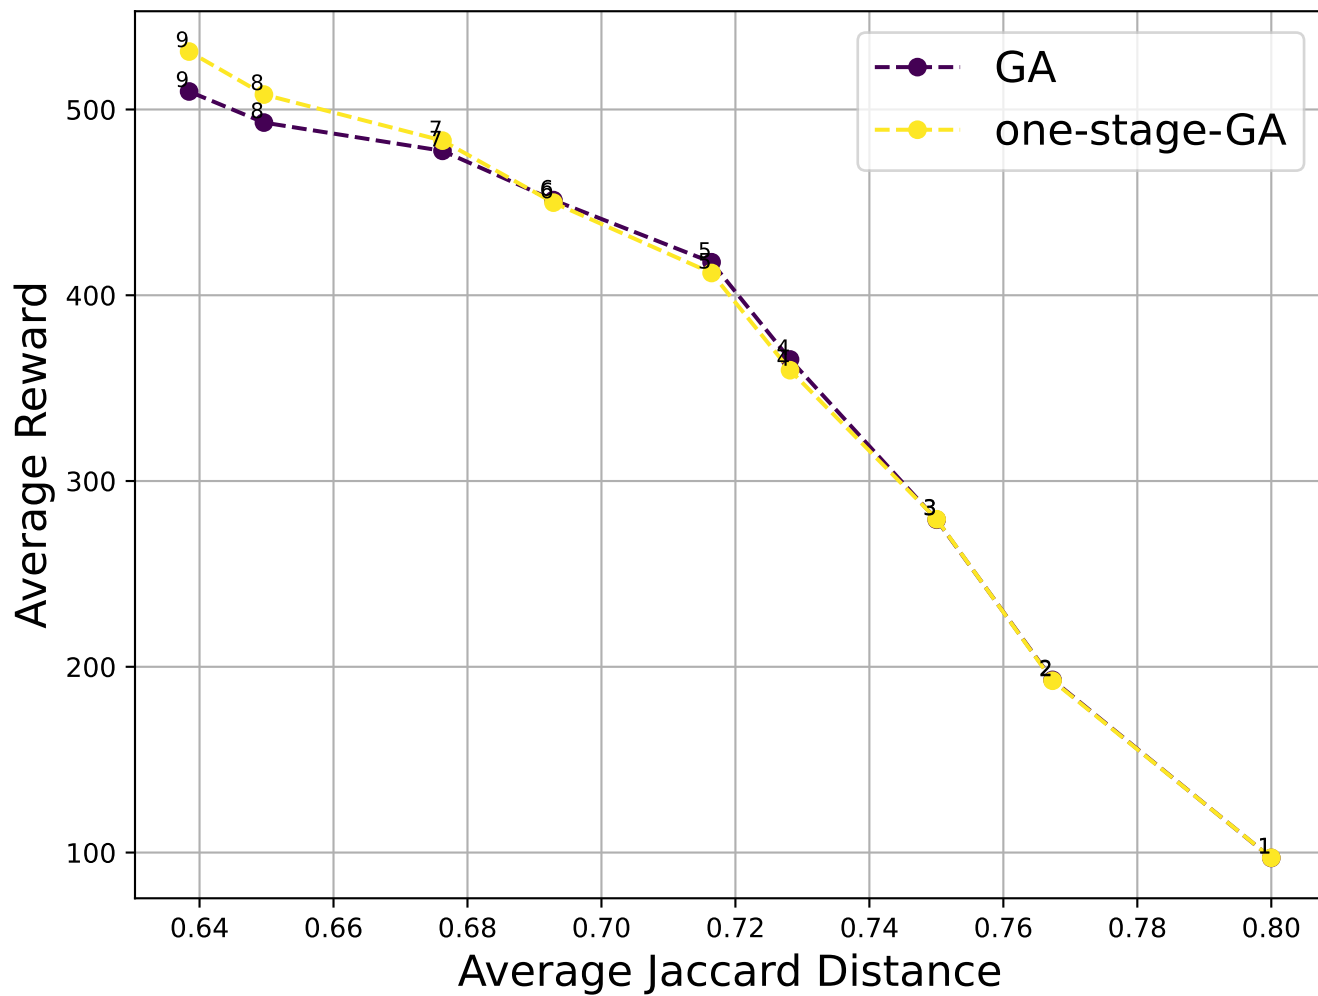

Supplement: Supplementary file 60 [file reward_vs_JD_teamformation.pdf › online-two-stage-sub-max-main/online-two-stage-sub-max-experiments/plots/analysis/teamformation/reward_vs_JD_teamformation.pdf]

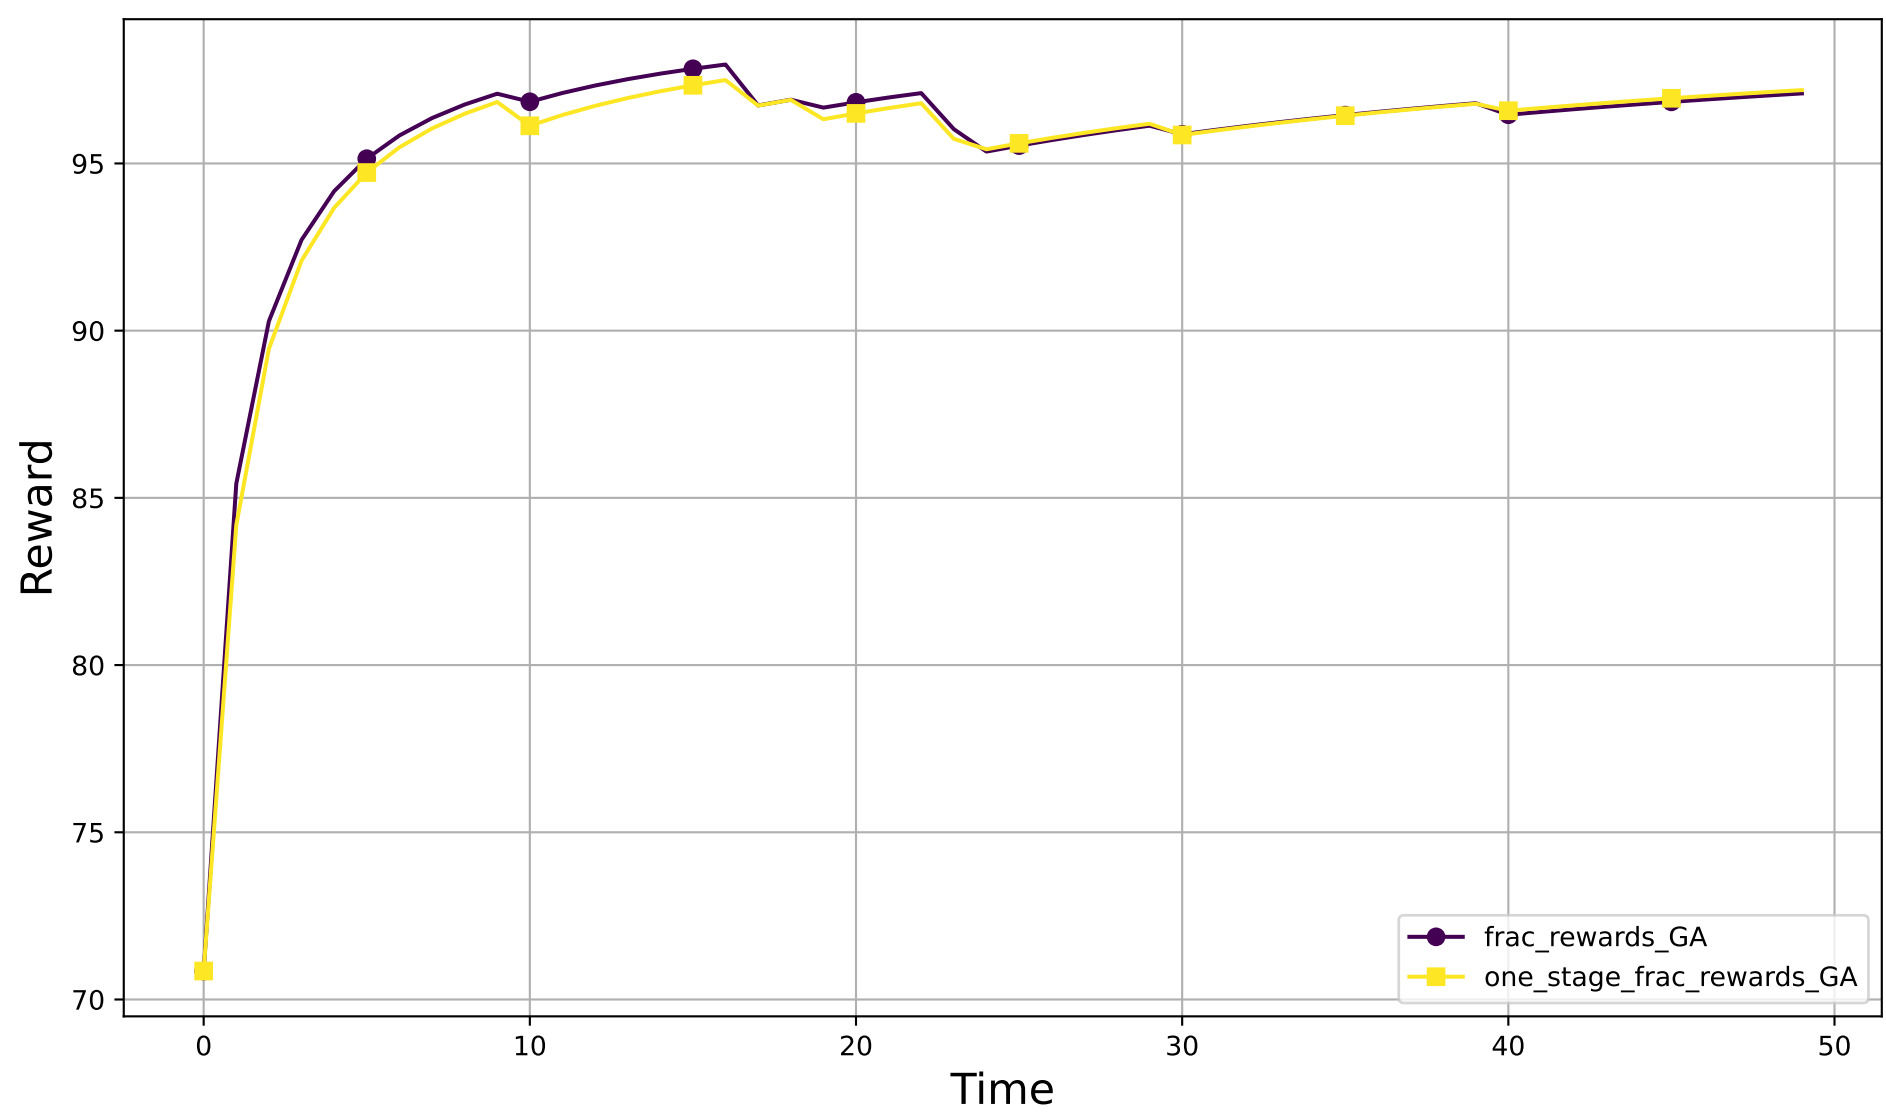

Supplement: Supplementary file 61 [file rewards_k1.pdf › online-two-stage-sub-max-main/online-two-stage-sub-max-experiments/plots/analysis/teamformation/rewards_k1.pdf]

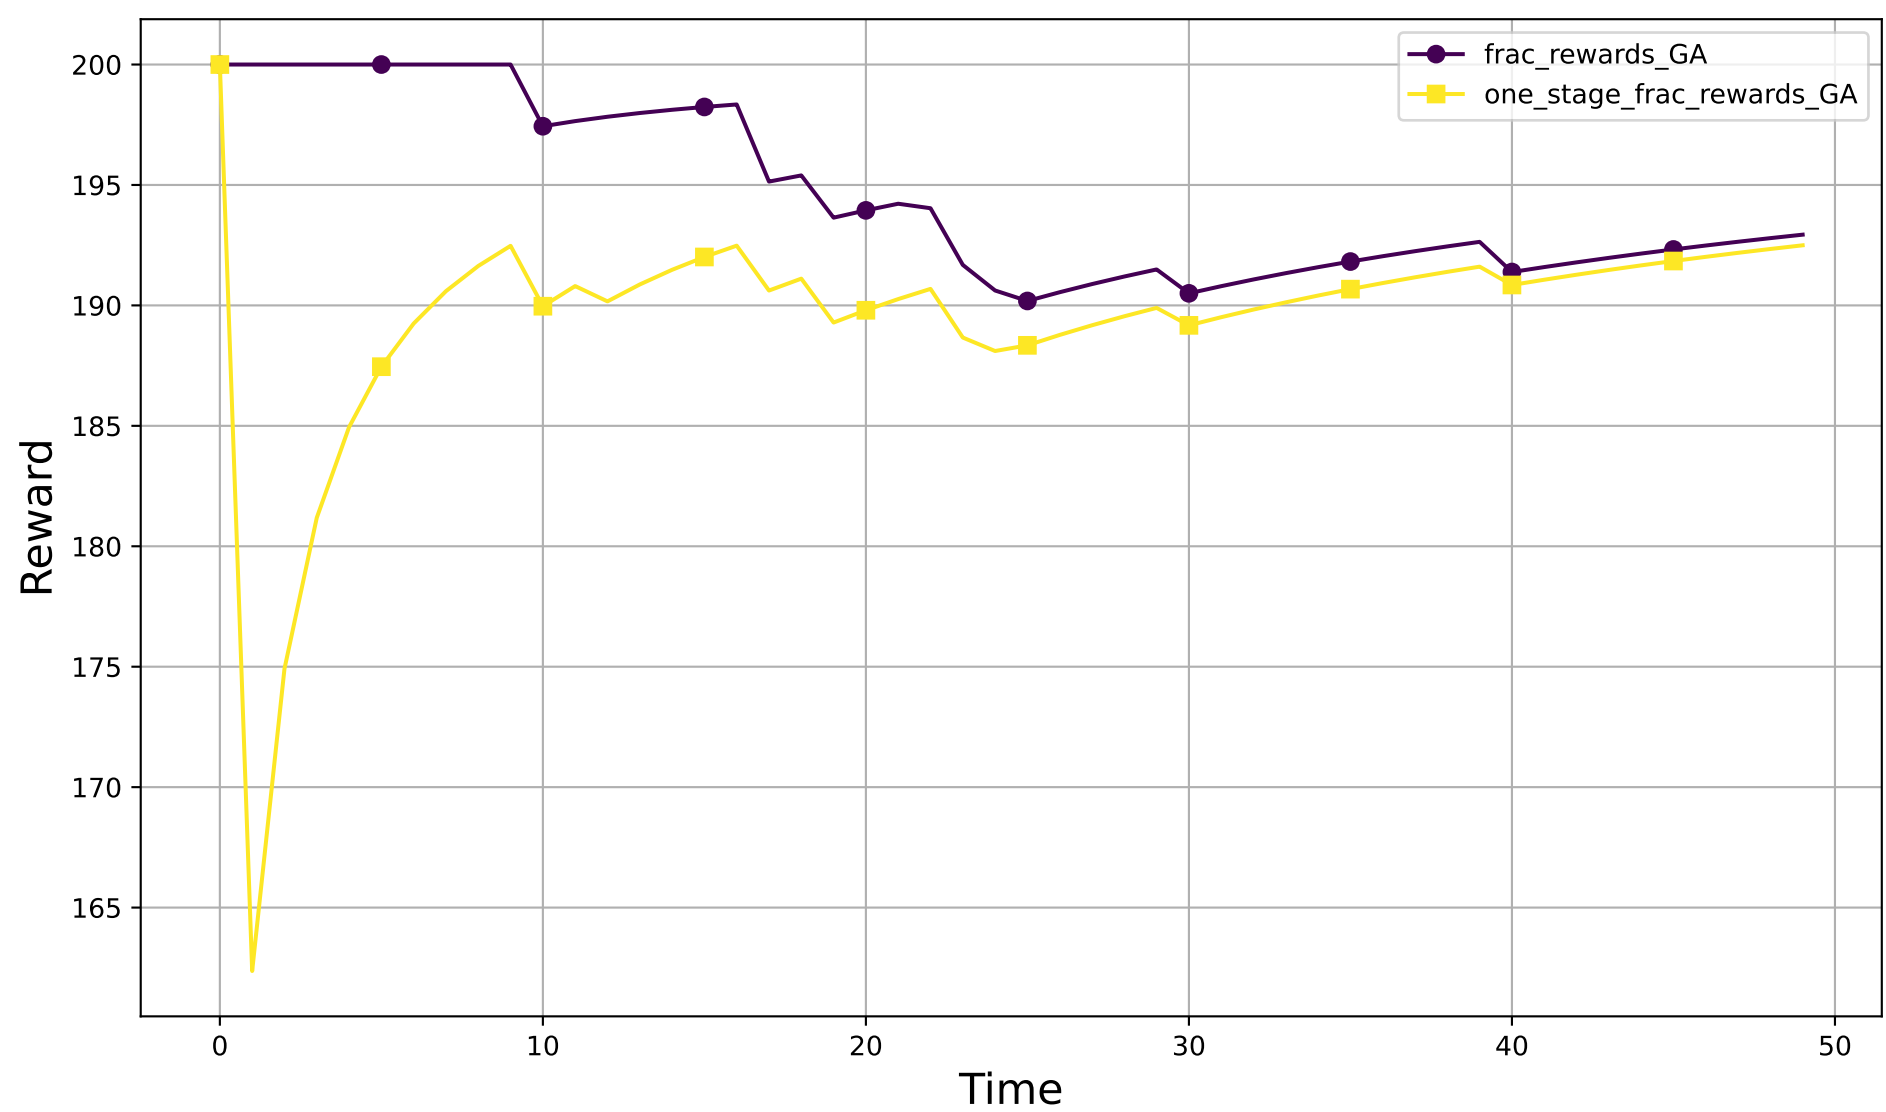

Supplement: Supplementary file 62 [file rewards_k2.pdf › online-two-stage-sub-max-main/online-two-stage-sub-max-experiments/plots/analysis/teamformation/rewards_k2.pdf]

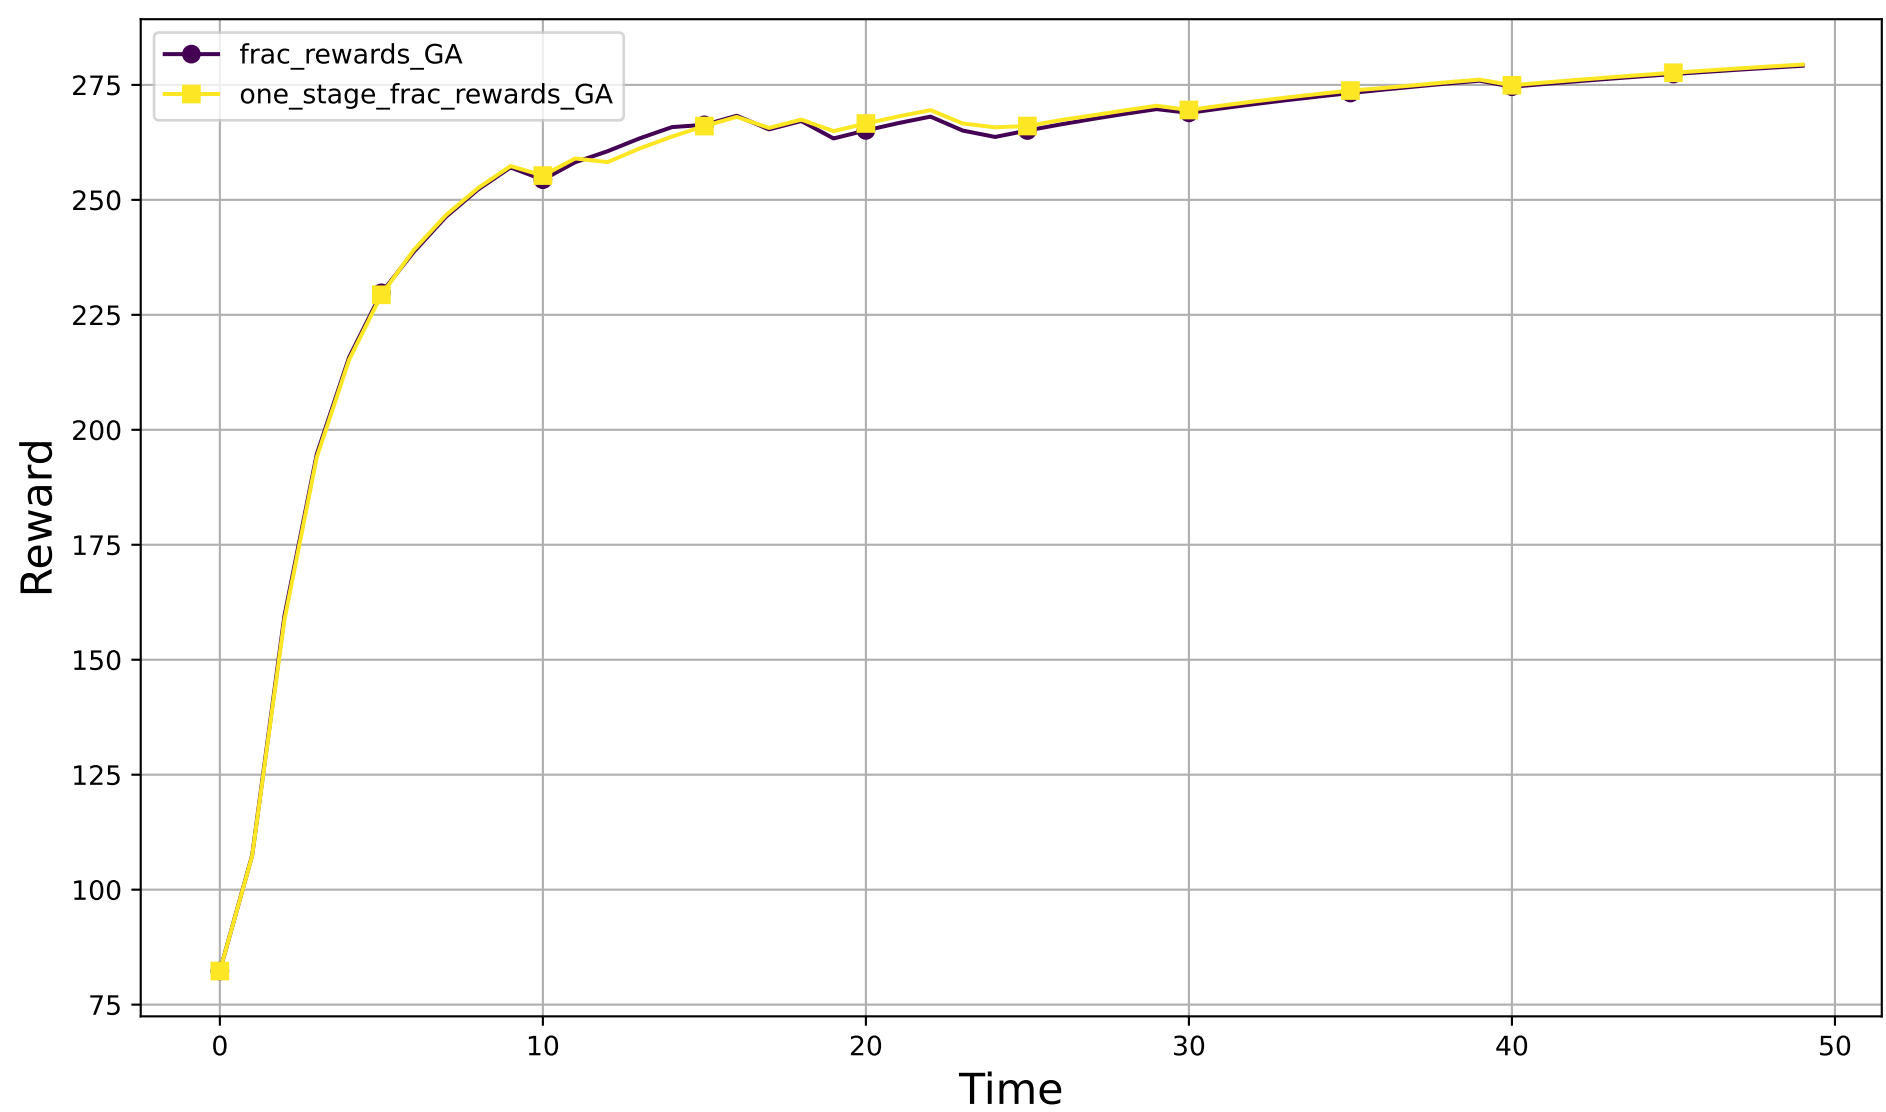

Supplement: Supplementary file 63 [file rewards_k3.pdf › online-two-stage-sub-max-main/online-two-stage-sub-max-experiments/plots/analysis/teamformation/rewards_k3.pdf]

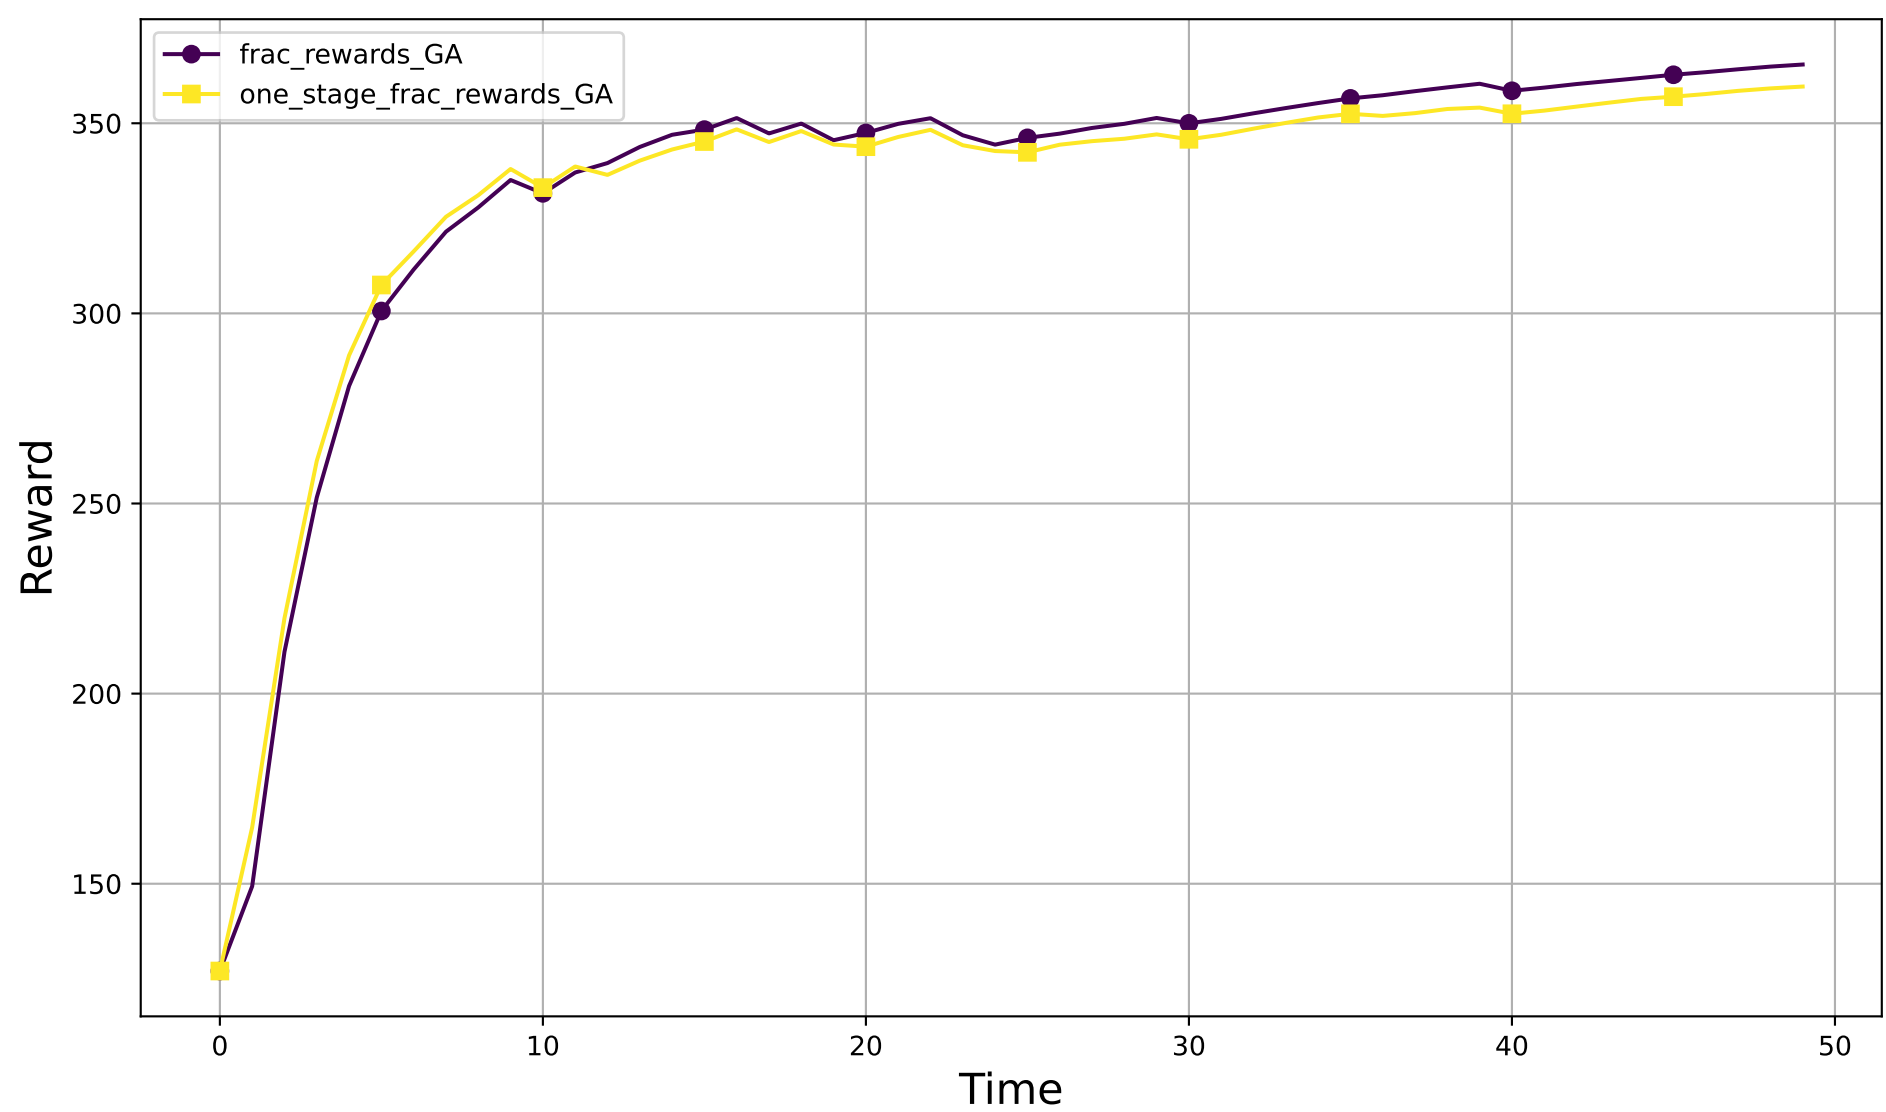

Supplement: Supplementary file 64 [file rewards_k4.pdf › online-two-stage-sub-max-main/online-two-stage-sub-max-experiments/plots/analysis/teamformation/rewards_k4.pdf]

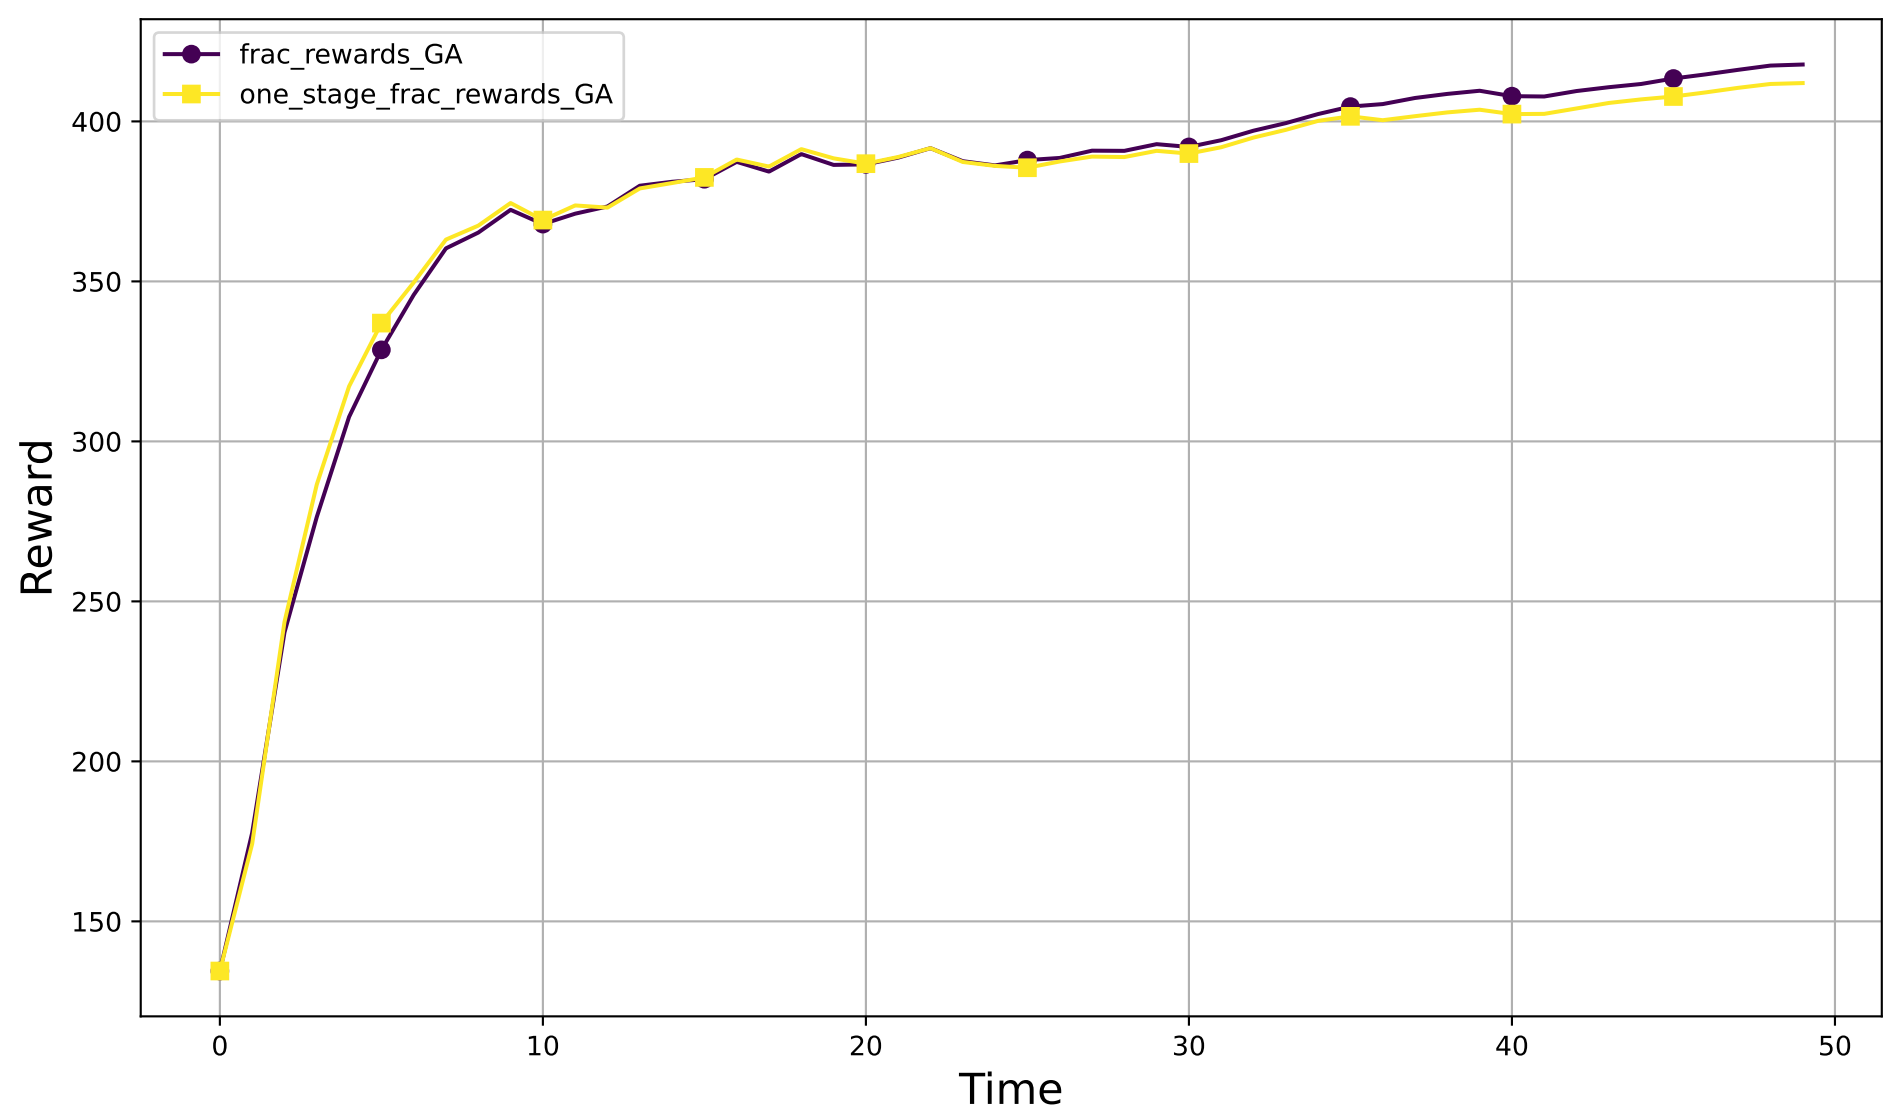

Supplement: Supplementary file 65 [file rewards_k5.pdf › online-two-stage-sub-max-main/online-two-stage-sub-max-experiments/plots/analysis/teamformation/rewards_k5.pdf]

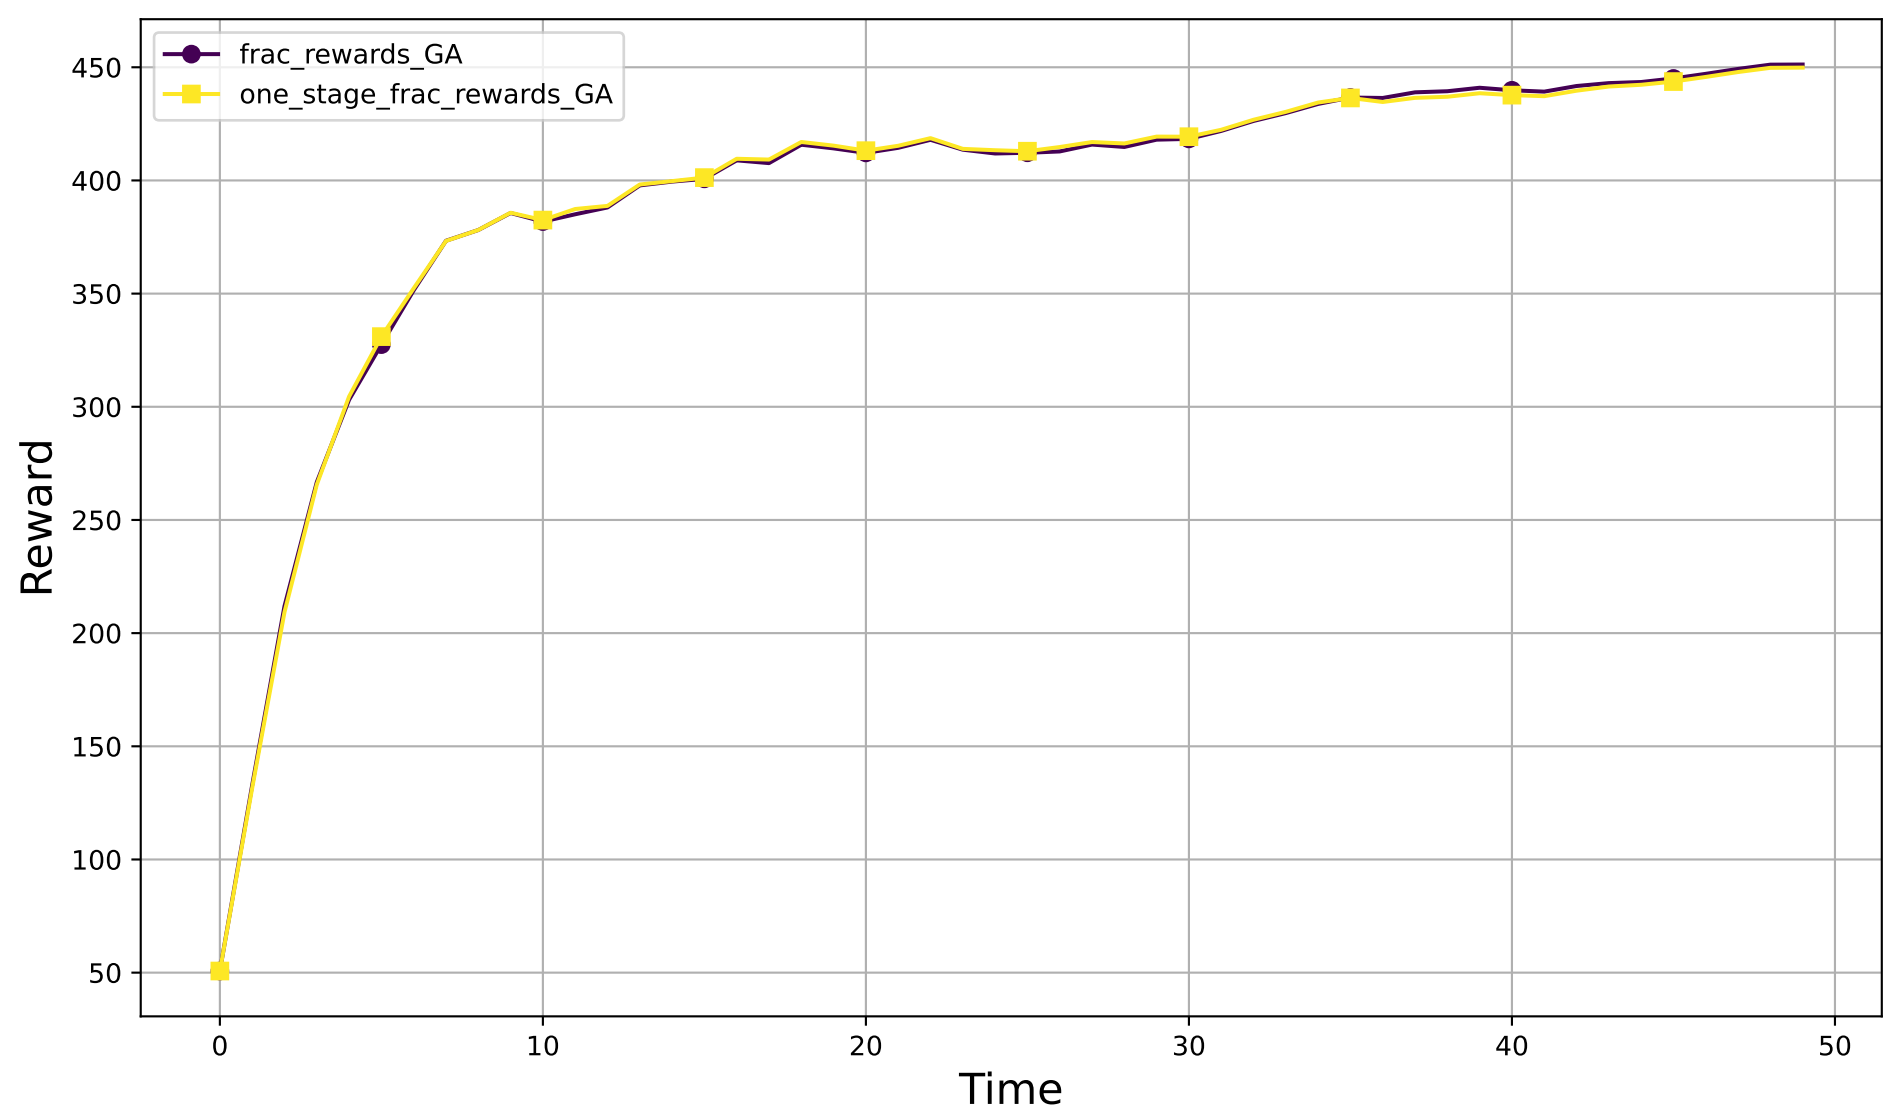

Supplement: Supplementary file 66 [file rewards_k6.pdf › online-two-stage-sub-max-main/online-two-stage-sub-max-experiments/plots/analysis/teamformation/rewards_k6.pdf]

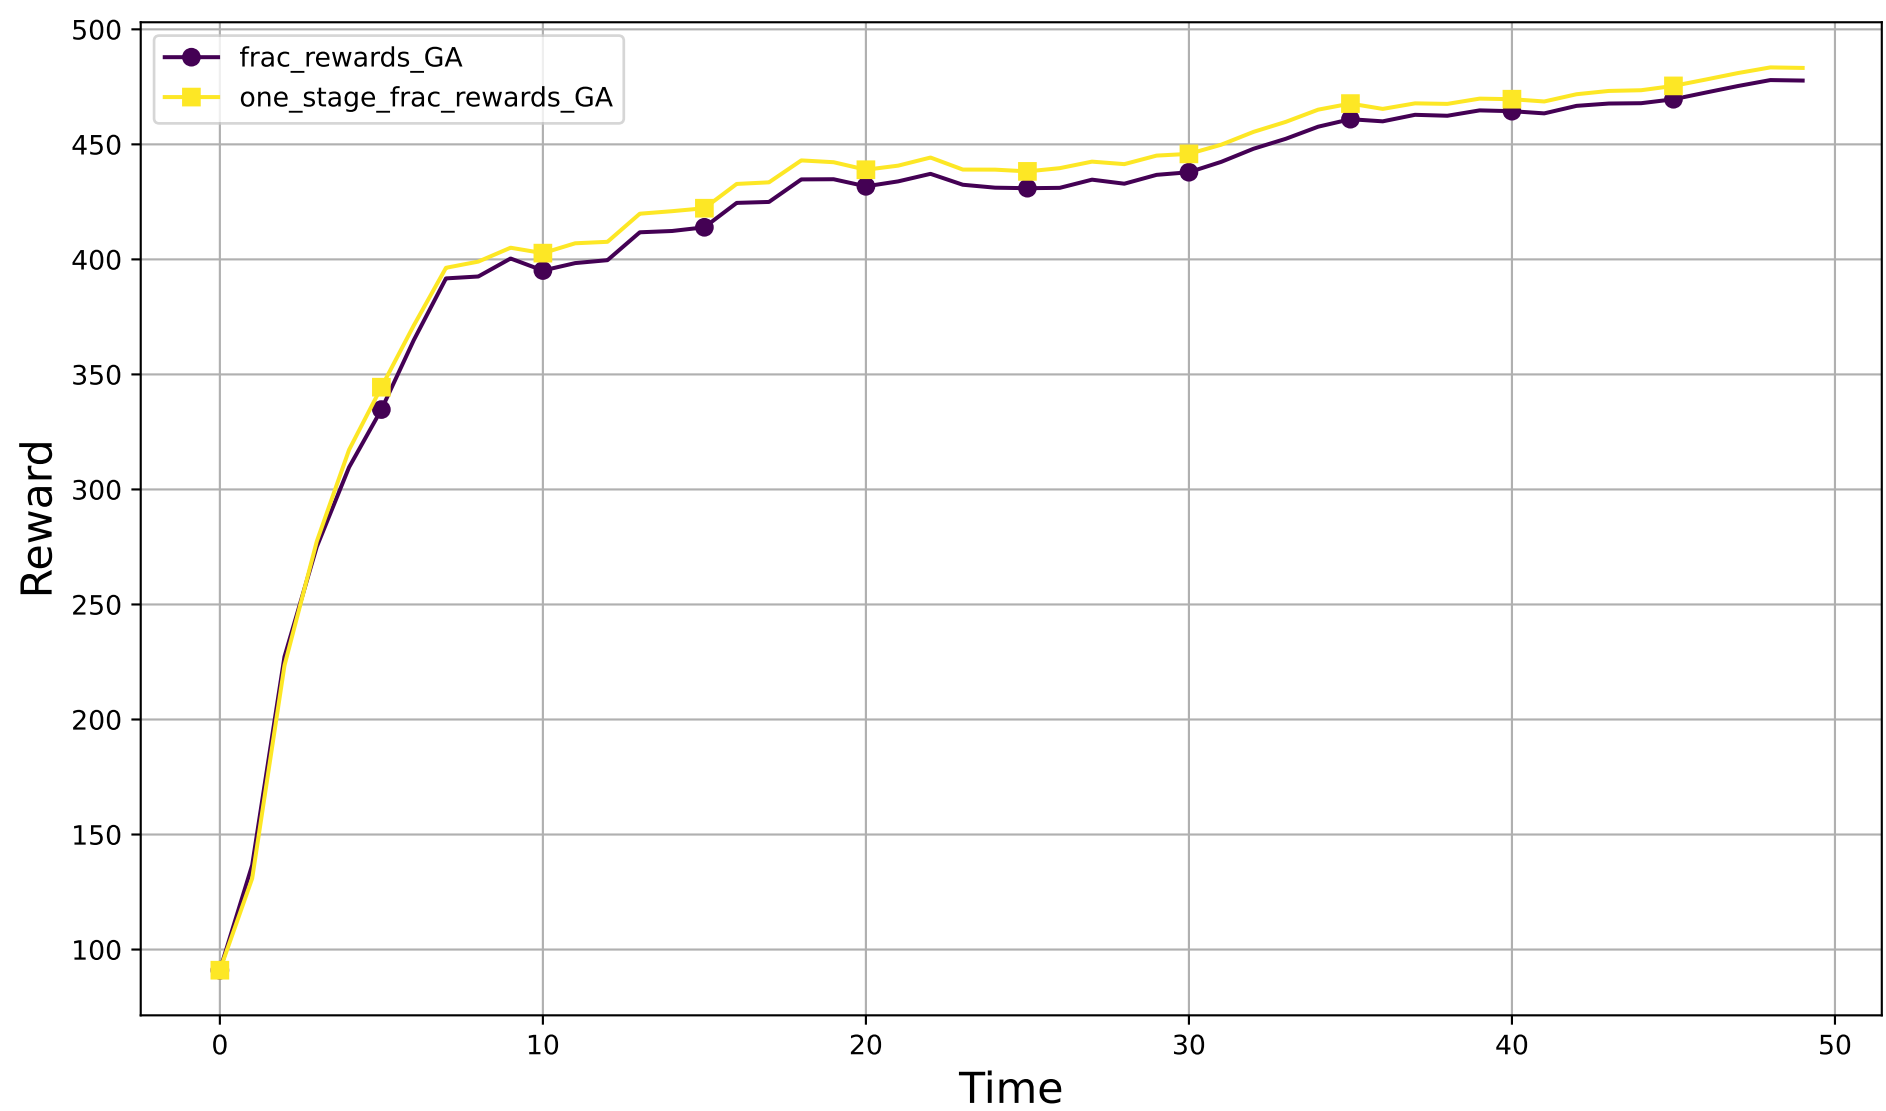

Supplement: Supplementary file 67 [file rewards_k7.pdf › online-two-stage-sub-max-main/online-two-stage-sub-max-experiments/plots/analysis/teamformation/rewards_k7.pdf]

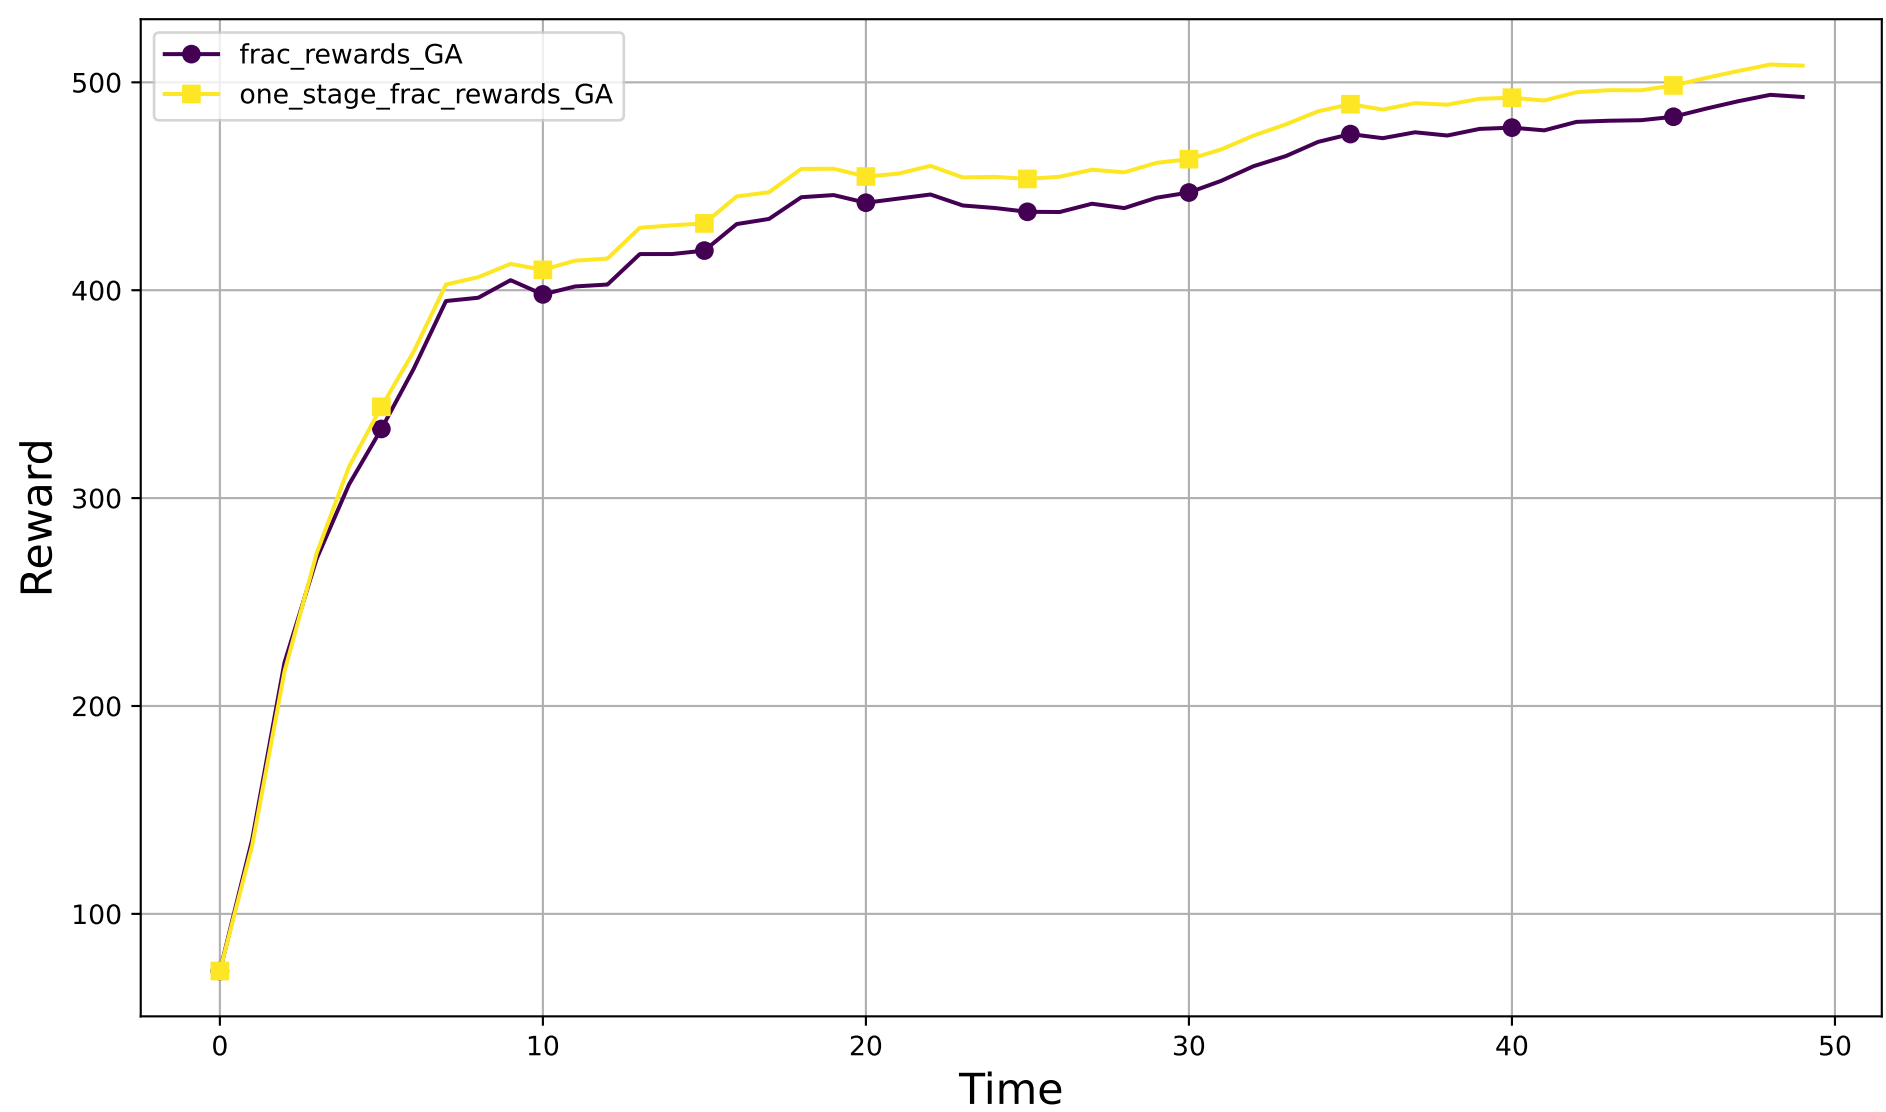

Supplement: Supplementary file 68 [file rewards_k8.pdf › online-two-stage-sub-max-main/online-two-stage-sub-max-experiments/plots/analysis/teamformation/rewards_k8.pdf]

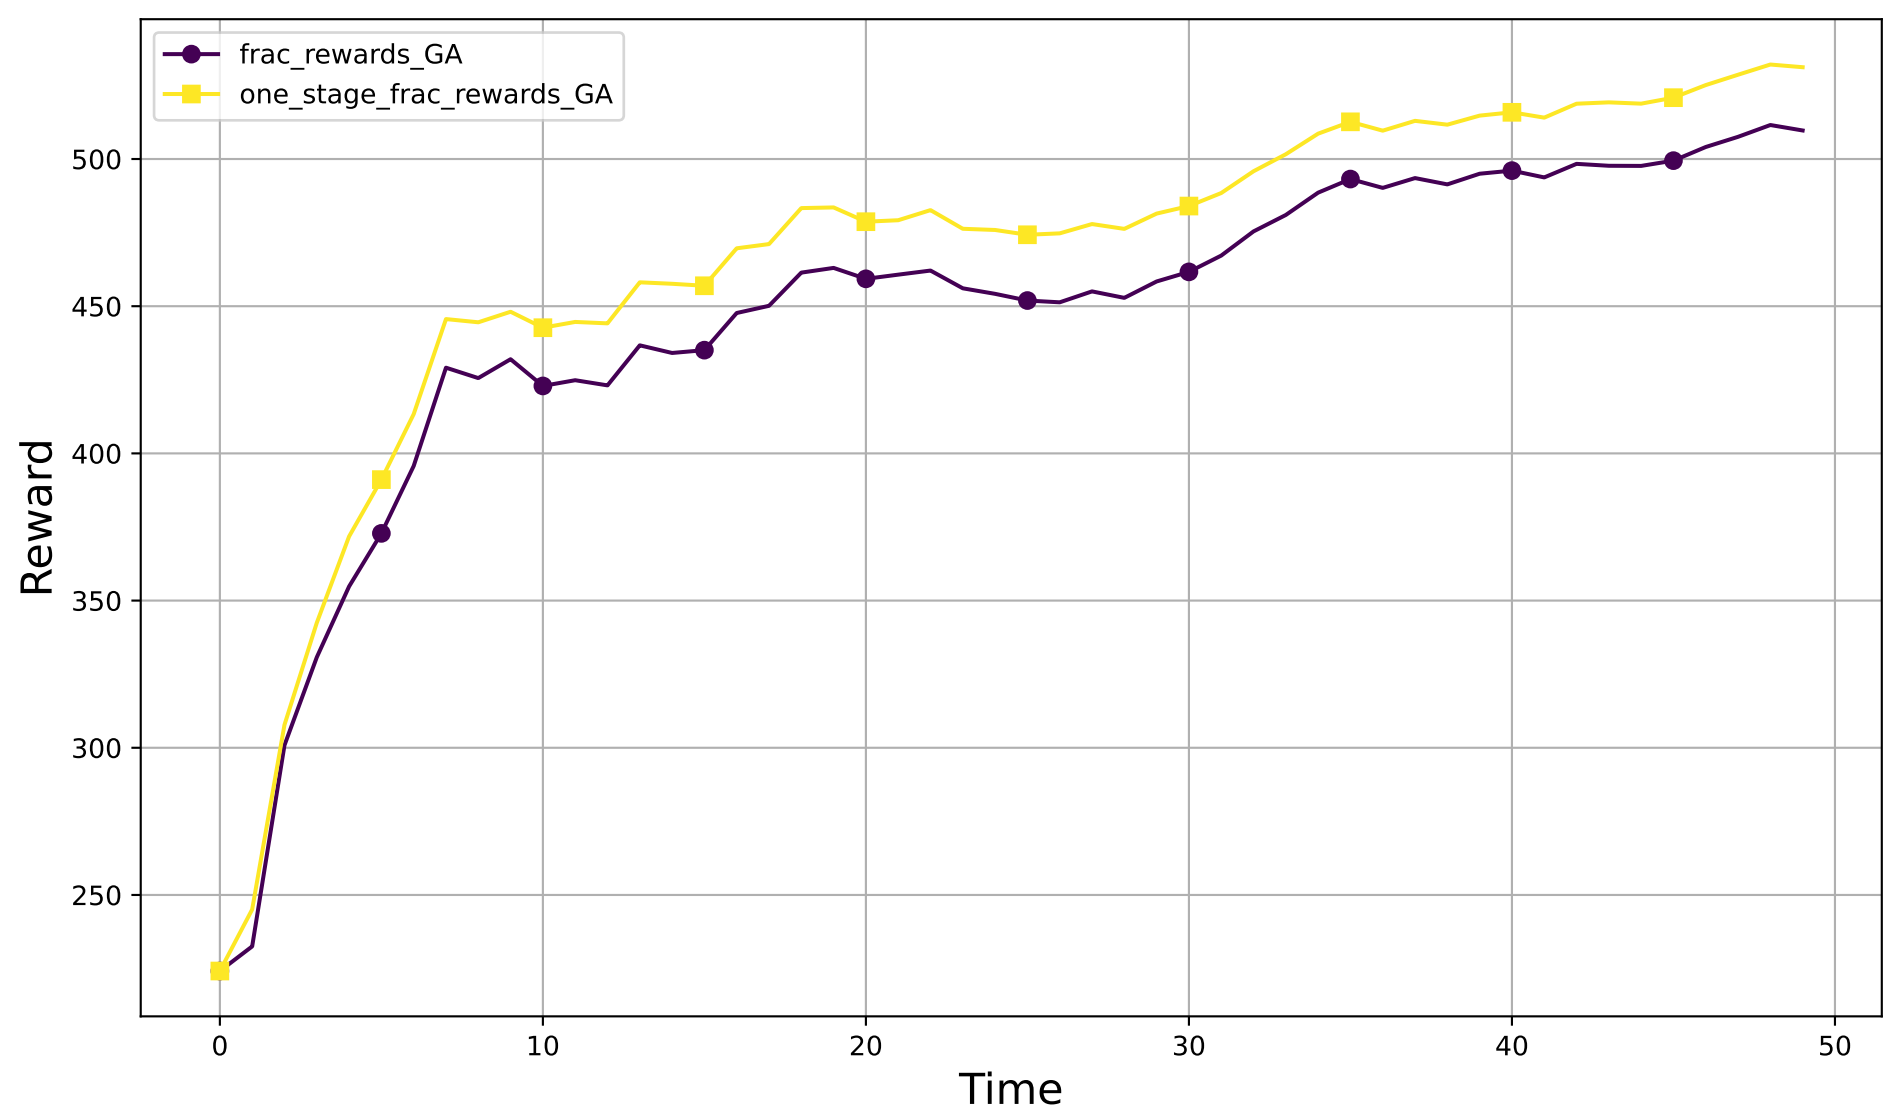

Supplement: Supplementary file 69 [file rewards_k9.pdf › online-two-stage-sub-max-main/online-two-stage-sub-max-experiments/plots/analysis/teamformation/rewards_k9.pdf]

Distribution of Potential Weights

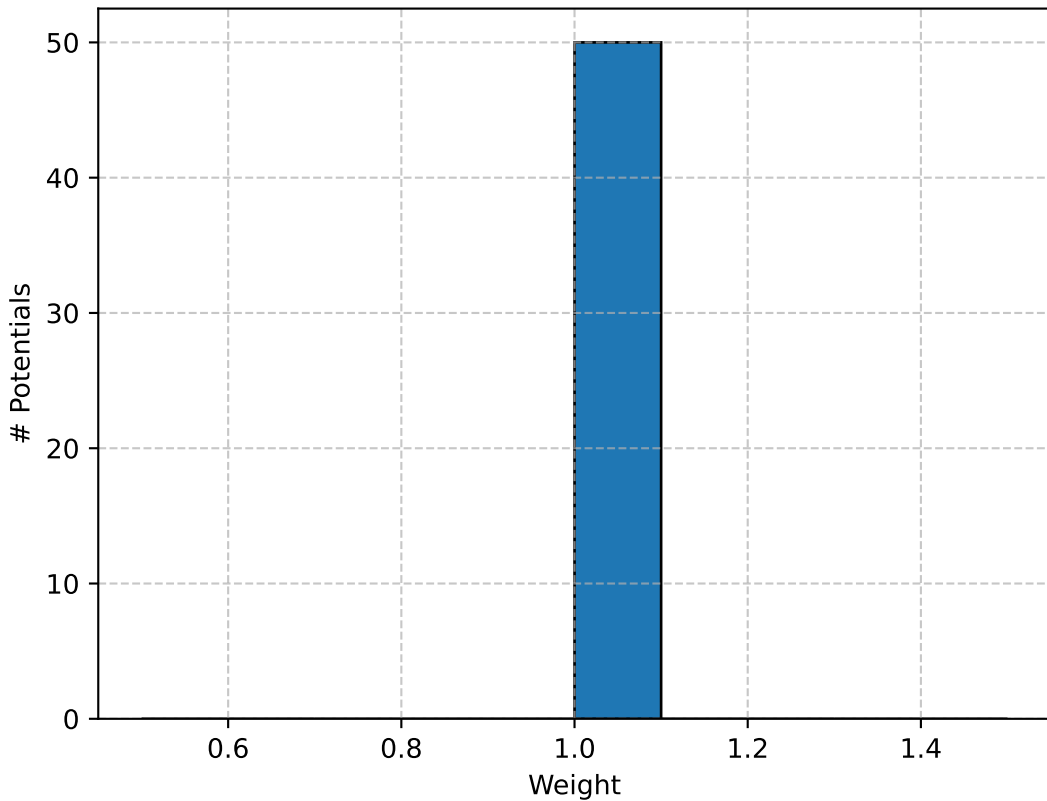

Supplement: Supplementary file 70 [file wtp_weights_dist.pdf › online-two-stage-sub-max-main/online-two-stage-sub-max-experiments/plots/analysis/teamformation/wtp_weights_dist.pdf]

Distribution of Potential Weights



Supplement: Supplementary file 71 [file wtp_weights_dist_teamformation.pdf › online-two-stage-sub-max-main/online-two-stage-sub-max-experiments/plots/analysis/teamformation/wtp_weights_dist_teamformation.pdf]

k vs Average Jaccard Distance of Optimal Solutions

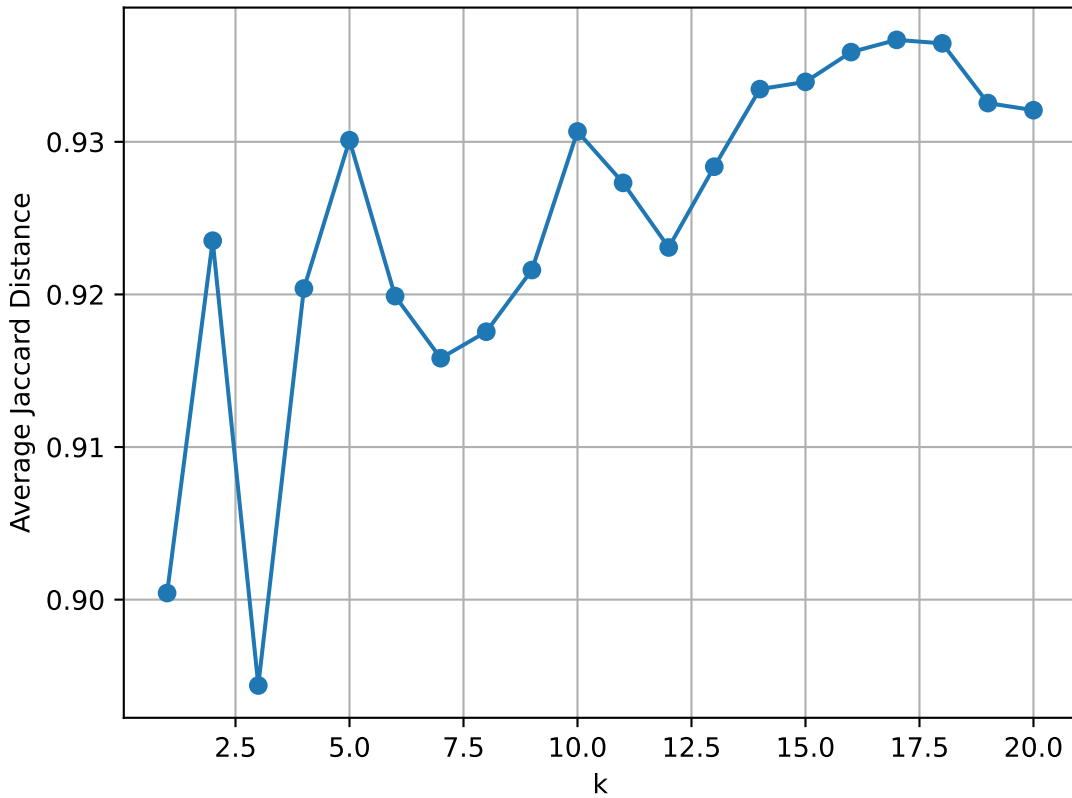

Supplement: Supplementary file 72 [file JD.pdf › online-two-stage-sub-max-main/online-two-stage-sub-max-experiments/plots/analysis/wikipedia/JD.pdf]

Average Jaccard Distance

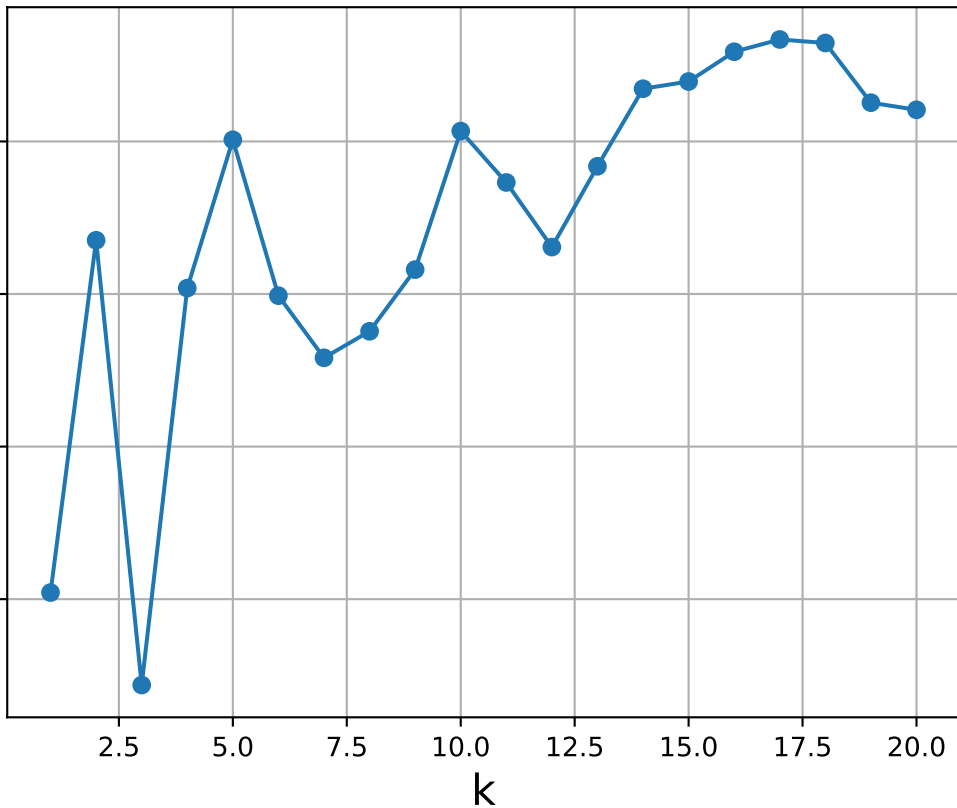

Supplement: Supplementary file 73 [file JD_wikipedia.pdf › online-two-stage-sub-max-main/online-two-stage-sub-max-experiments/plots/analysis/wikipedia/JD_wikipedia.pdf]

Average Reward vs Average Jaccard Distance (wikipedia)

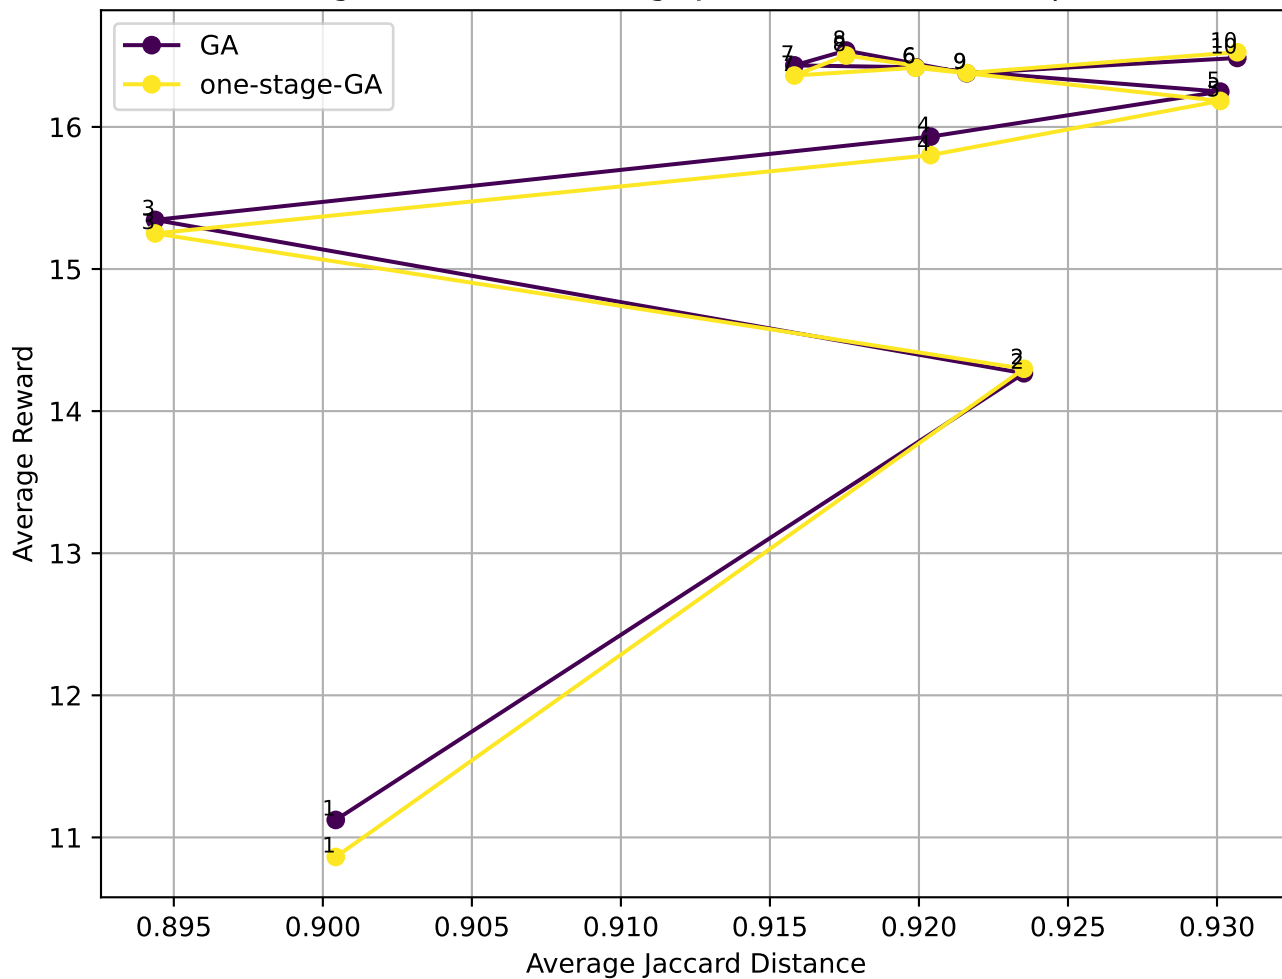

Supplement: Supplementary file 74 [file reward_vs_JD.pdf › online-two-stage-sub-max-main/online-two-stage-sub-max-experiments/plots/analysis/wikipedia/reward_vs_JD.pdf]

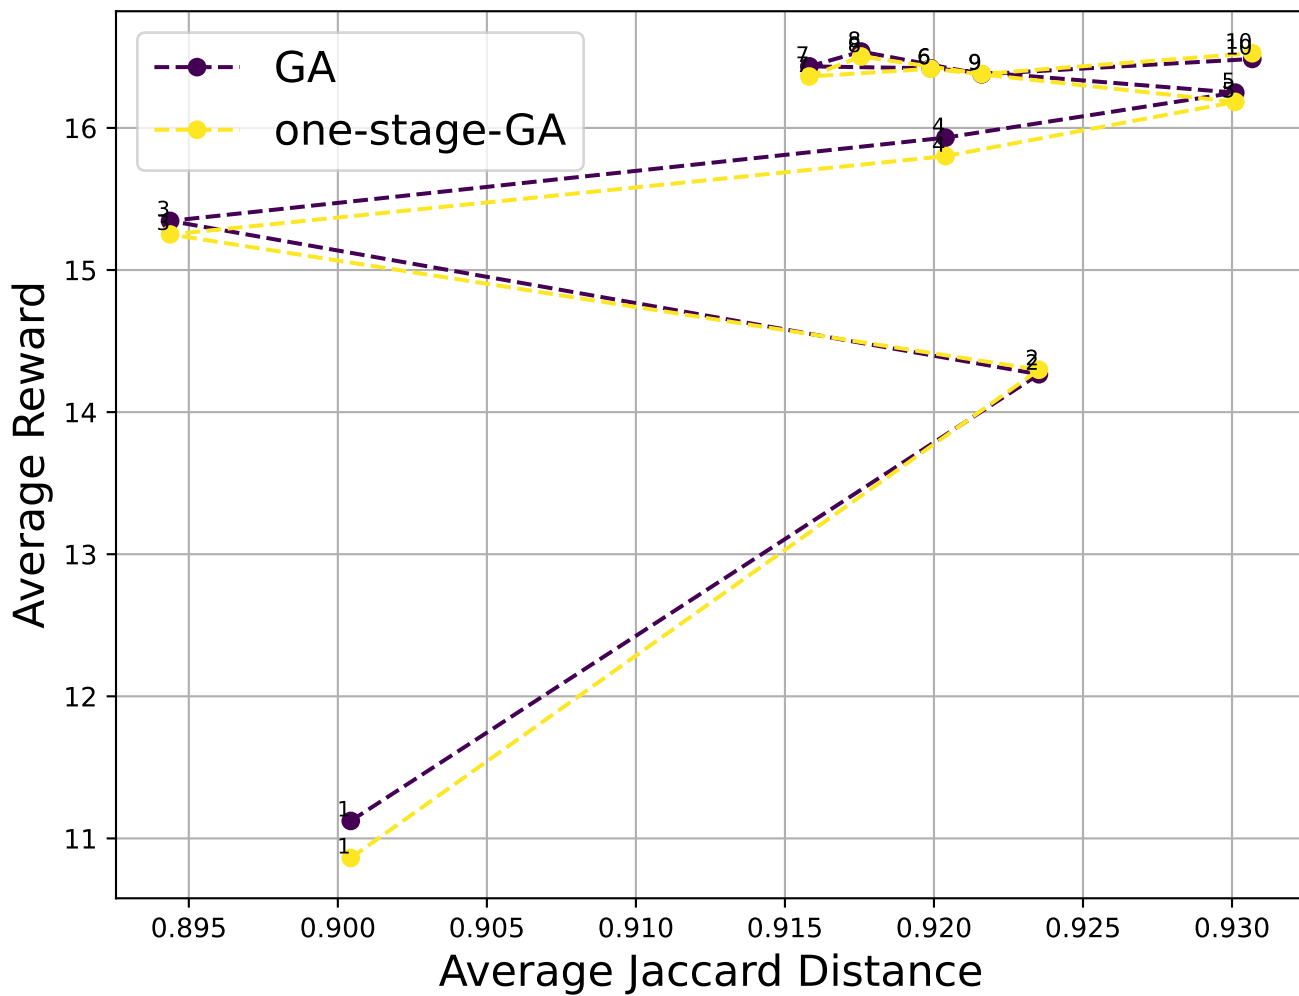

Supplement: Supplementary file 75 [file reward_vs_JD_wikipedia.pdf › online-two-stage-sub-max-main/online-two-stage-sub-max-experiments/plots/analysis/wikipedia/reward_vs_JD_wikipedia.pdf]

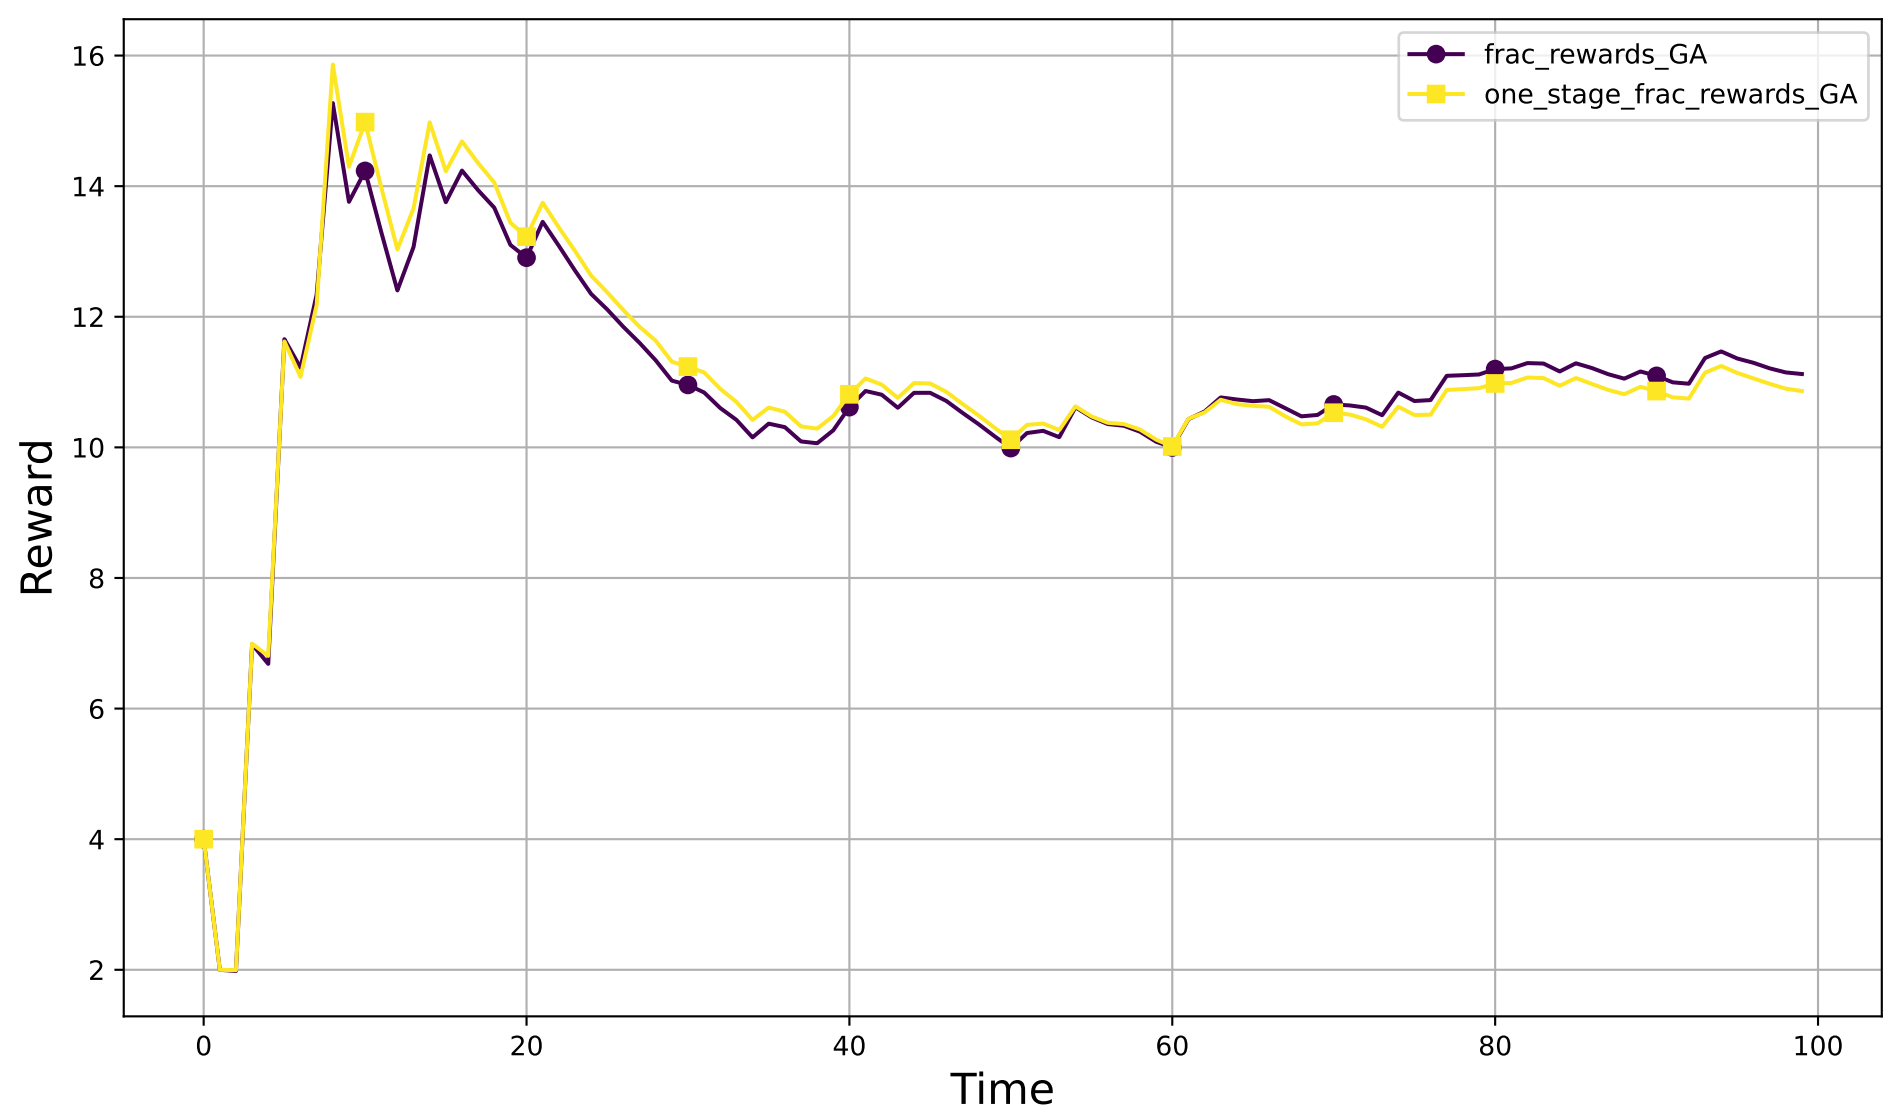

Supplement: Supplementary file 76 [file rewards_k1.pdf › online-two-stage-sub-max-main/online-two-stage-sub-max-experiments/plots/analysis/wikipedia/rewards_k1.pdf]

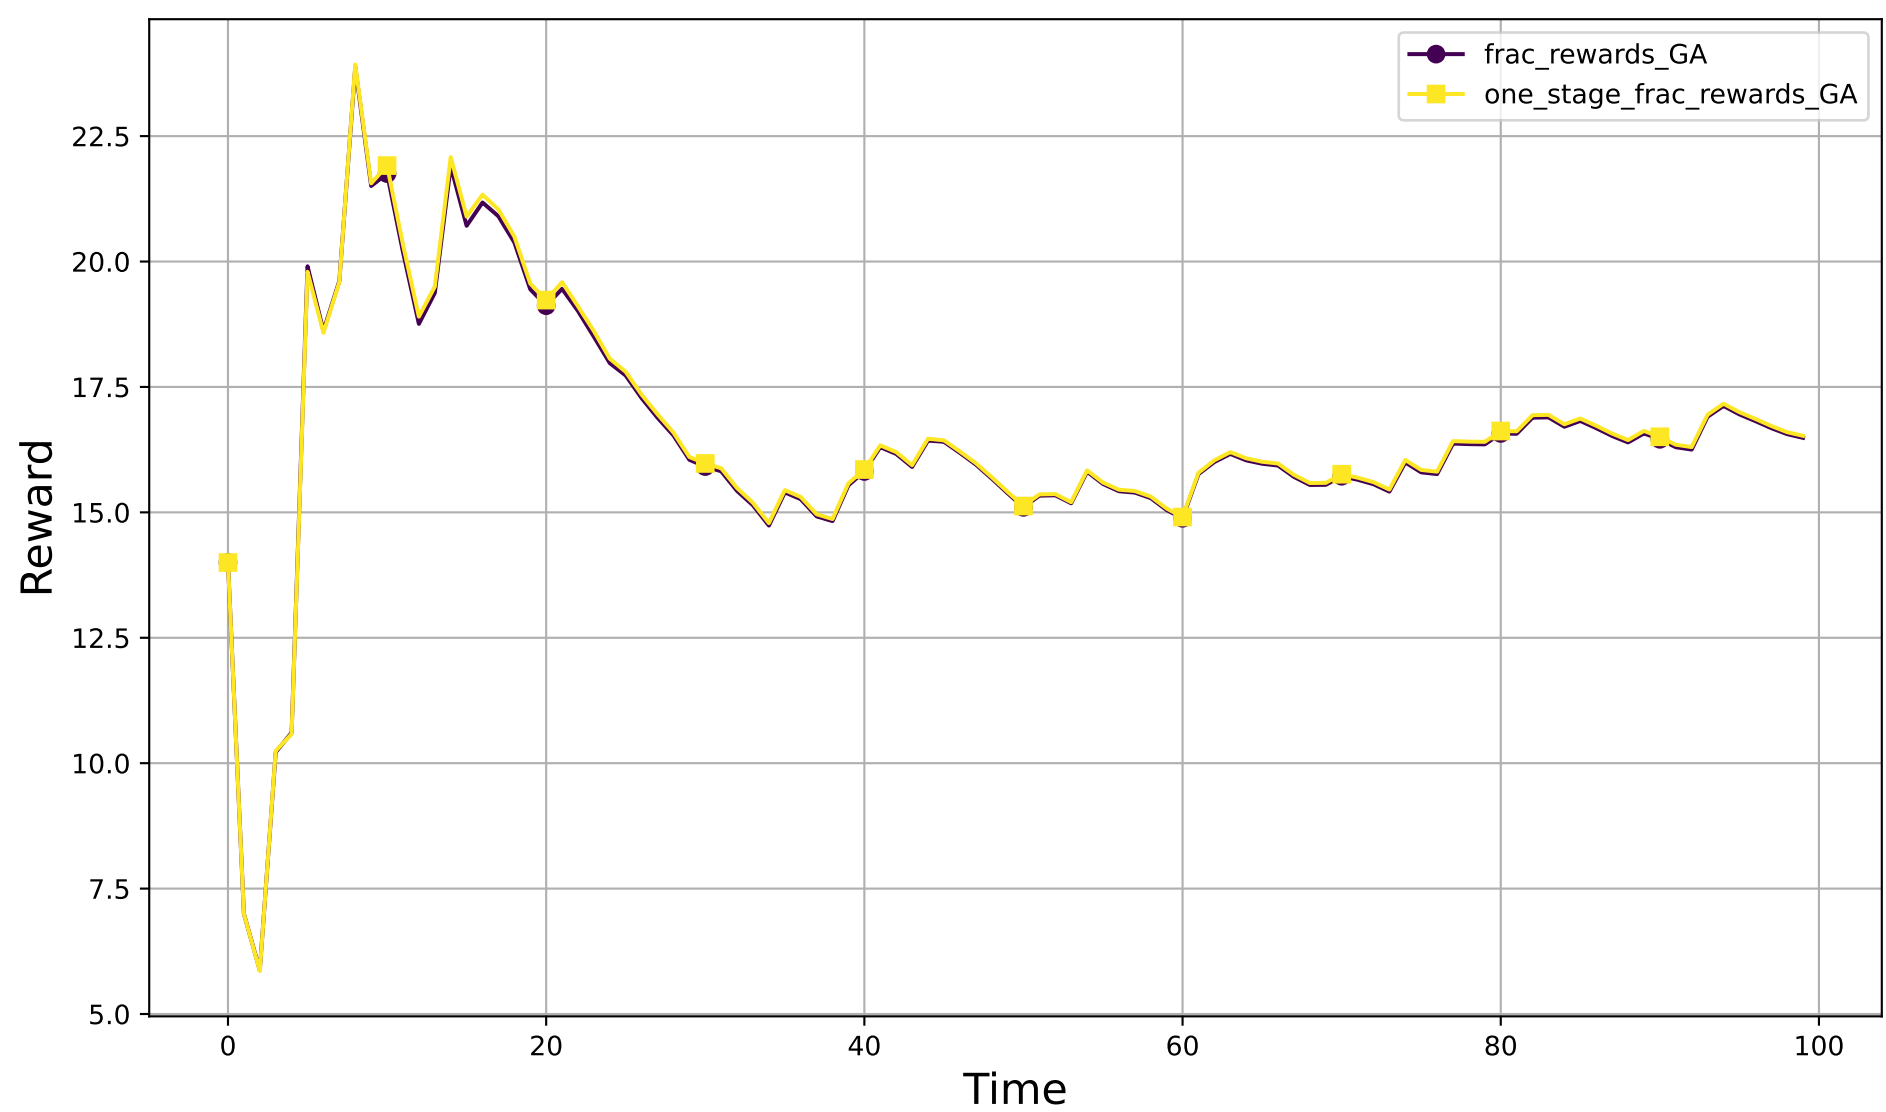

Supplement: Supplementary file 77 [file rewards_k10.pdf › online-two-stage-sub-max-main/online-two-stage-sub-max-experiments/plots/analysis/wikipedia/rewards_k10.pdf]

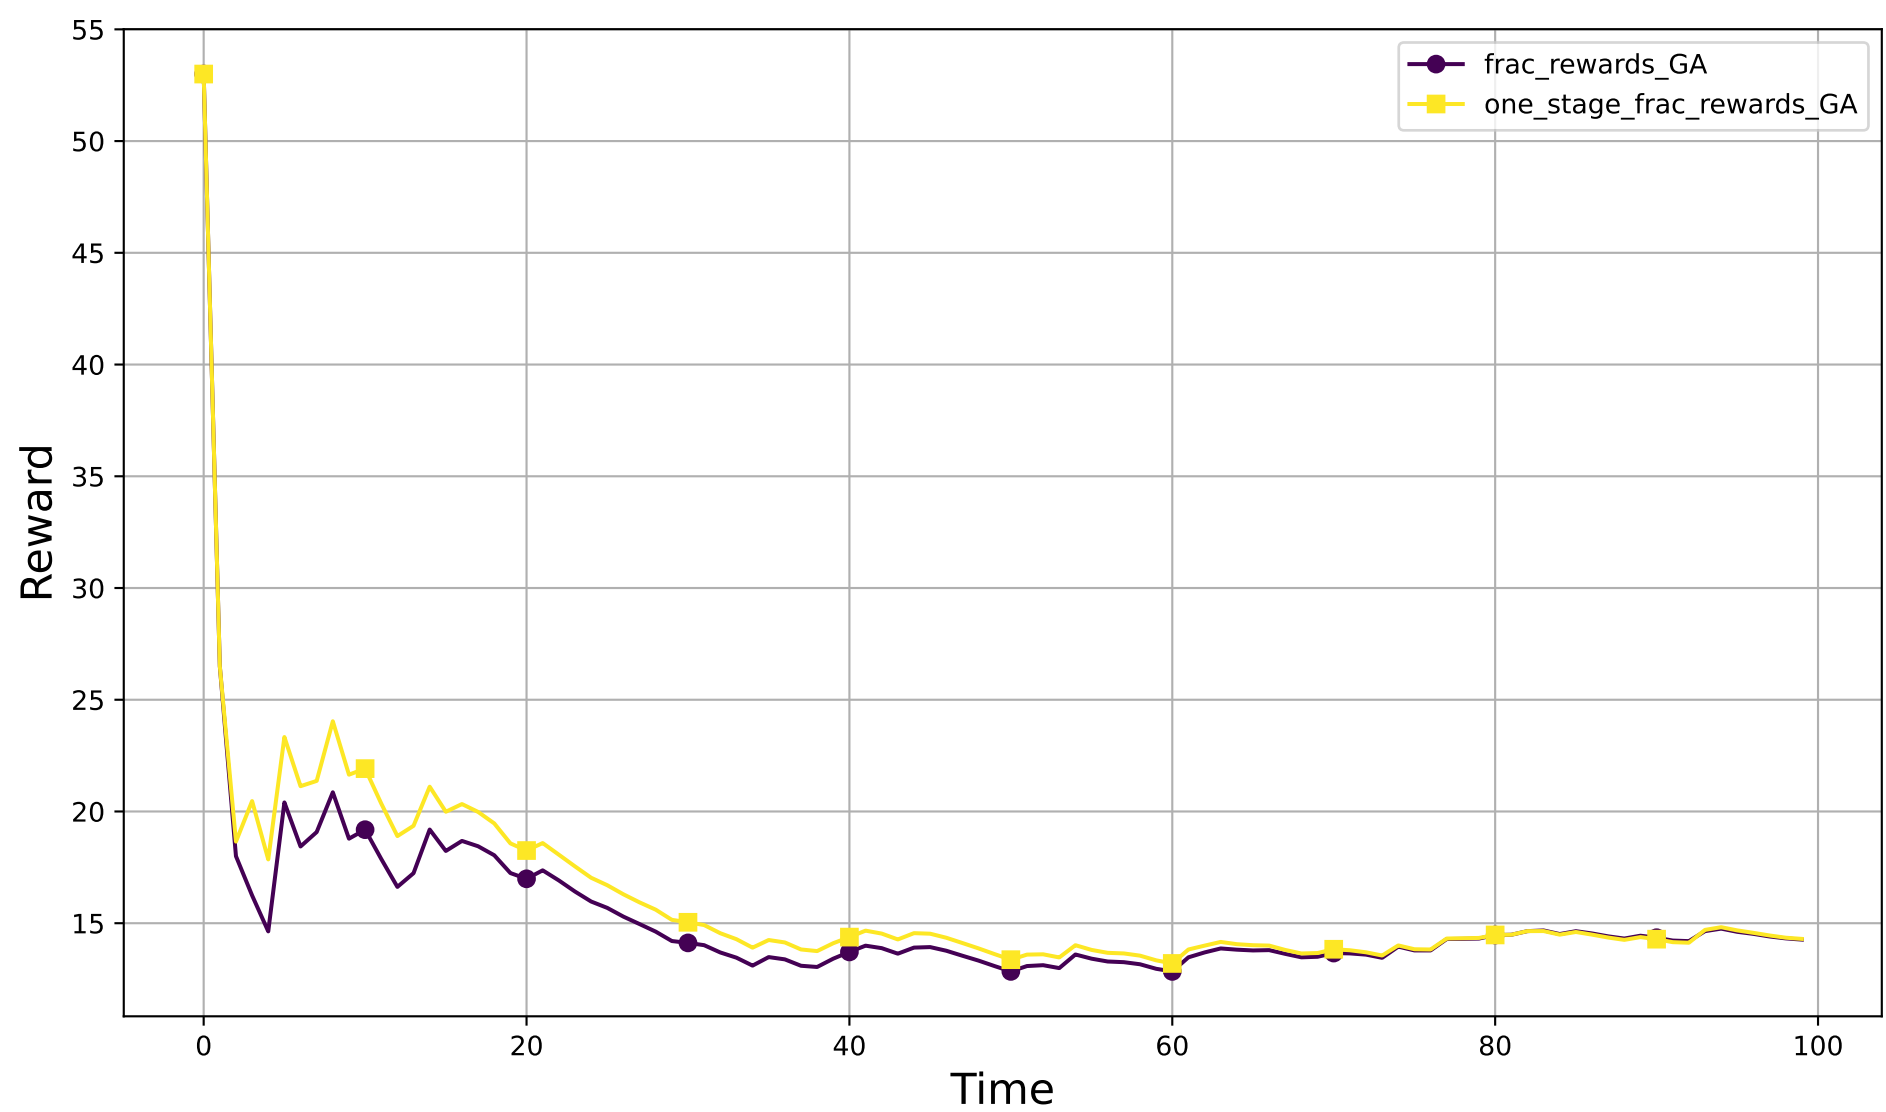

Supplement: Supplementary file 78 [file rewards_k2.pdf › online-two-stage-sub-max-main/online-two-stage-sub-max-experiments/plots/analysis/wikipedia/rewards_k2.pdf]

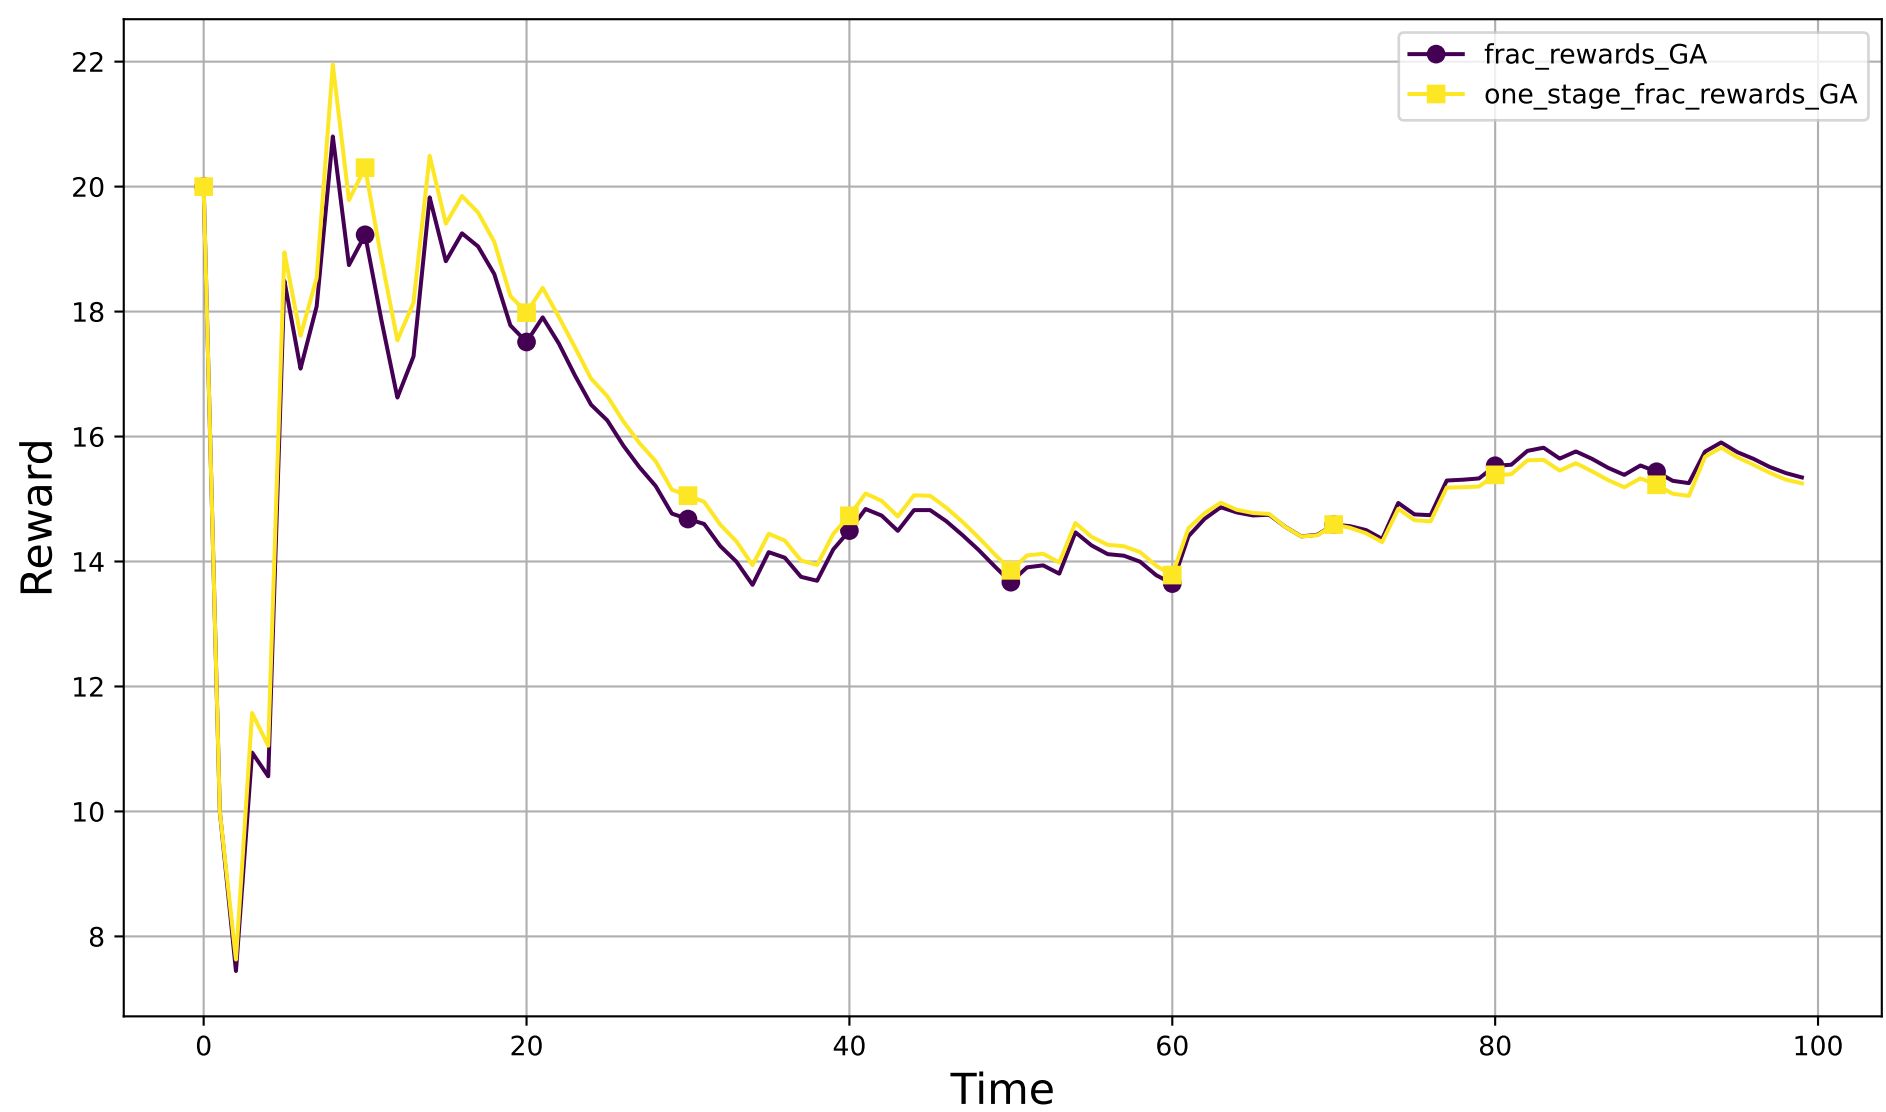

Supplement: Supplementary file 79 [file rewards_k3.pdf › online-two-stage-sub-max-main/online-two-stage-sub-max-experiments/plots/analysis/wikipedia/rewards_k3.pdf]

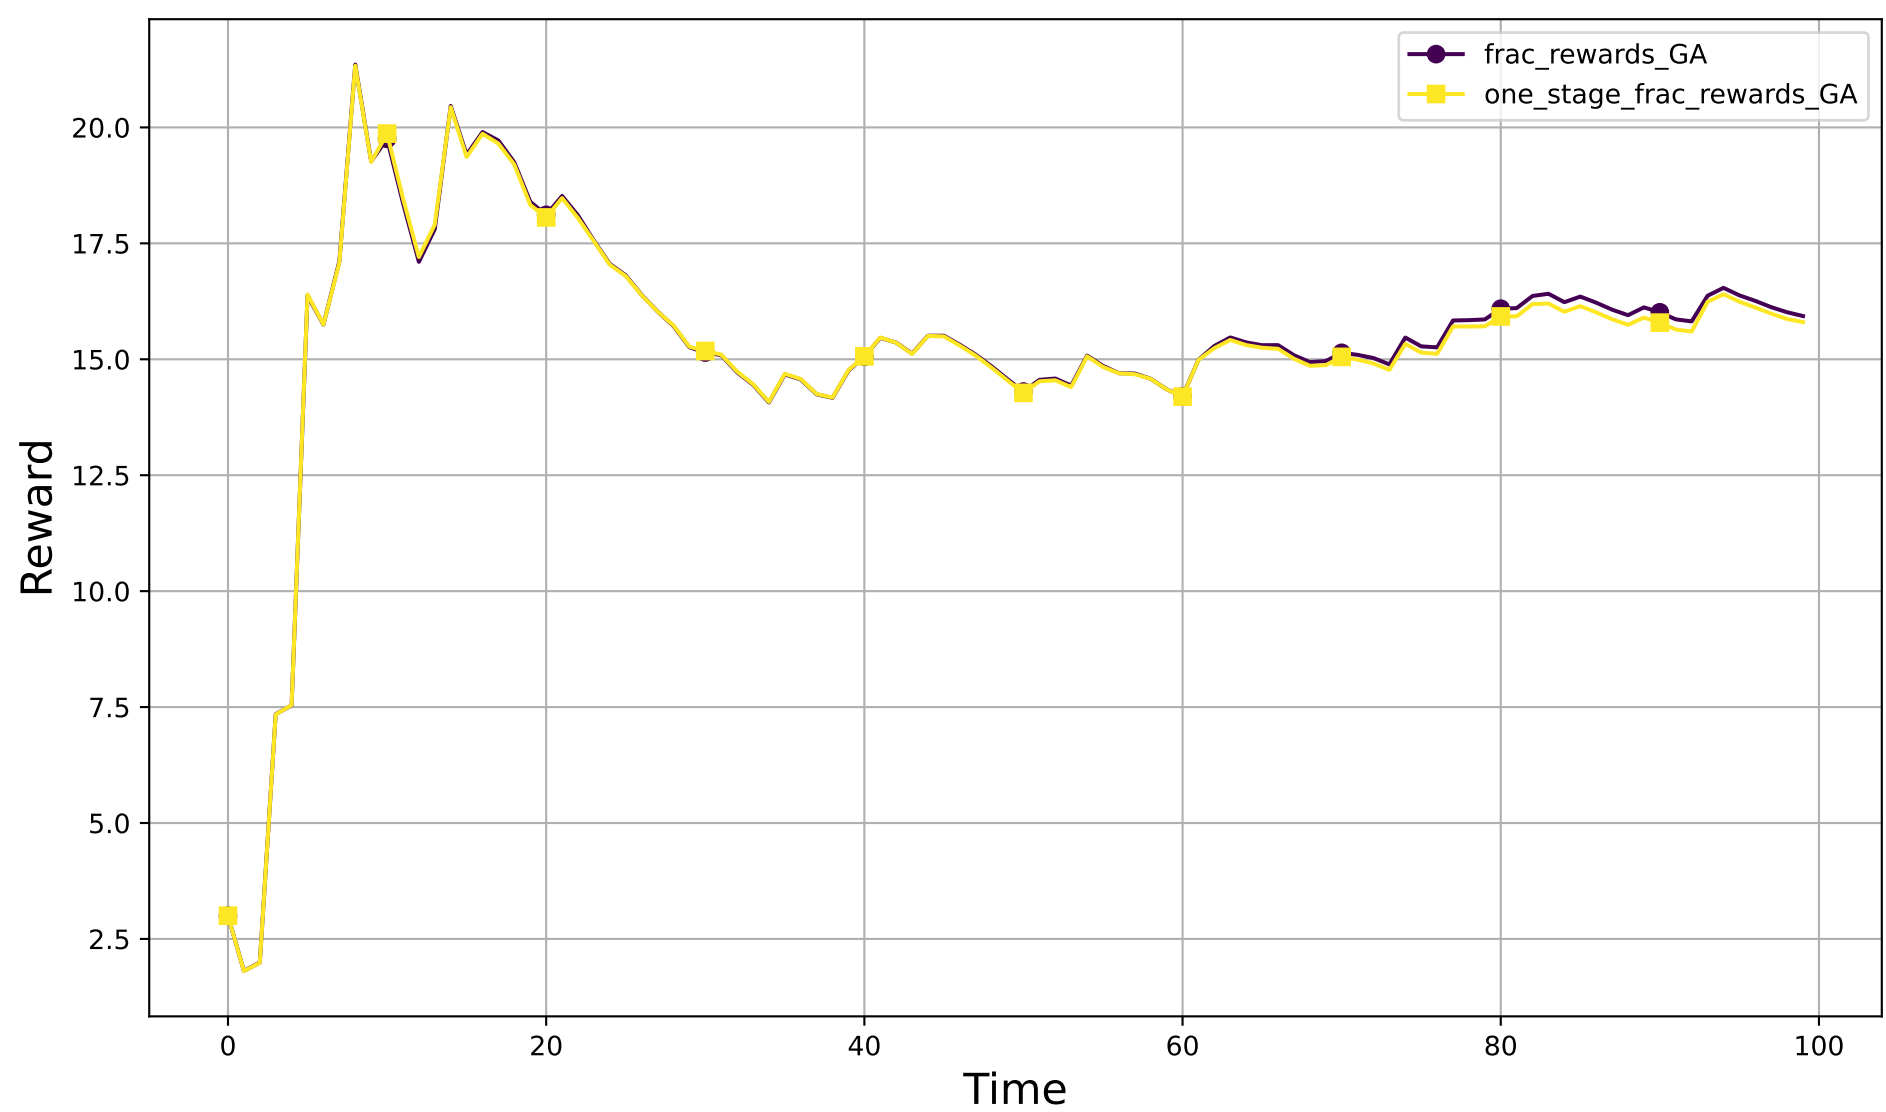

Supplement: Supplementary file 80 [file rewards_k4.pdf › online-two-stage-sub-max-main/online-two-stage-sub-max-experiments/plots/analysis/wikipedia/rewards_k4.pdf]

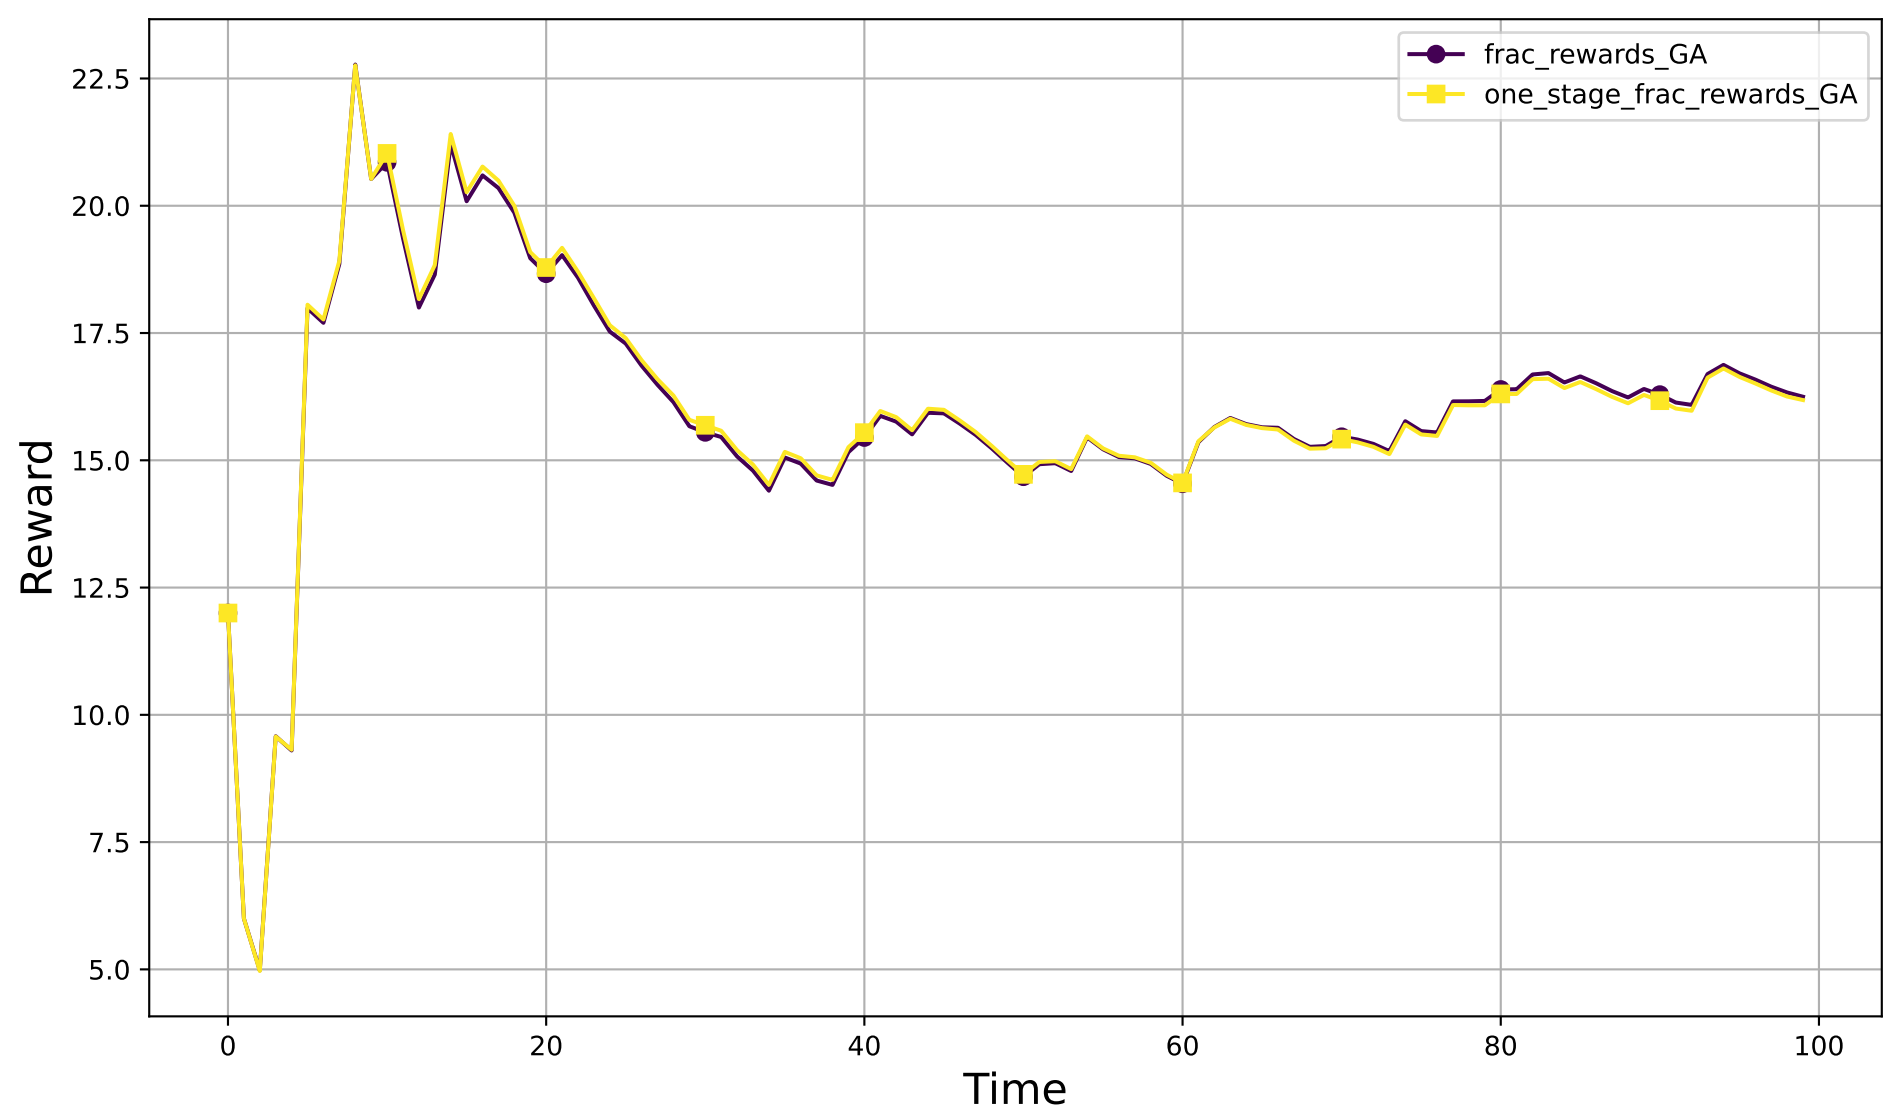

Supplement: Supplementary file 81 [file rewards_k5.pdf › online-two-stage-sub-max-main/online-two-stage-sub-max-experiments/plots/analysis/wikipedia/rewards_k5.pdf]

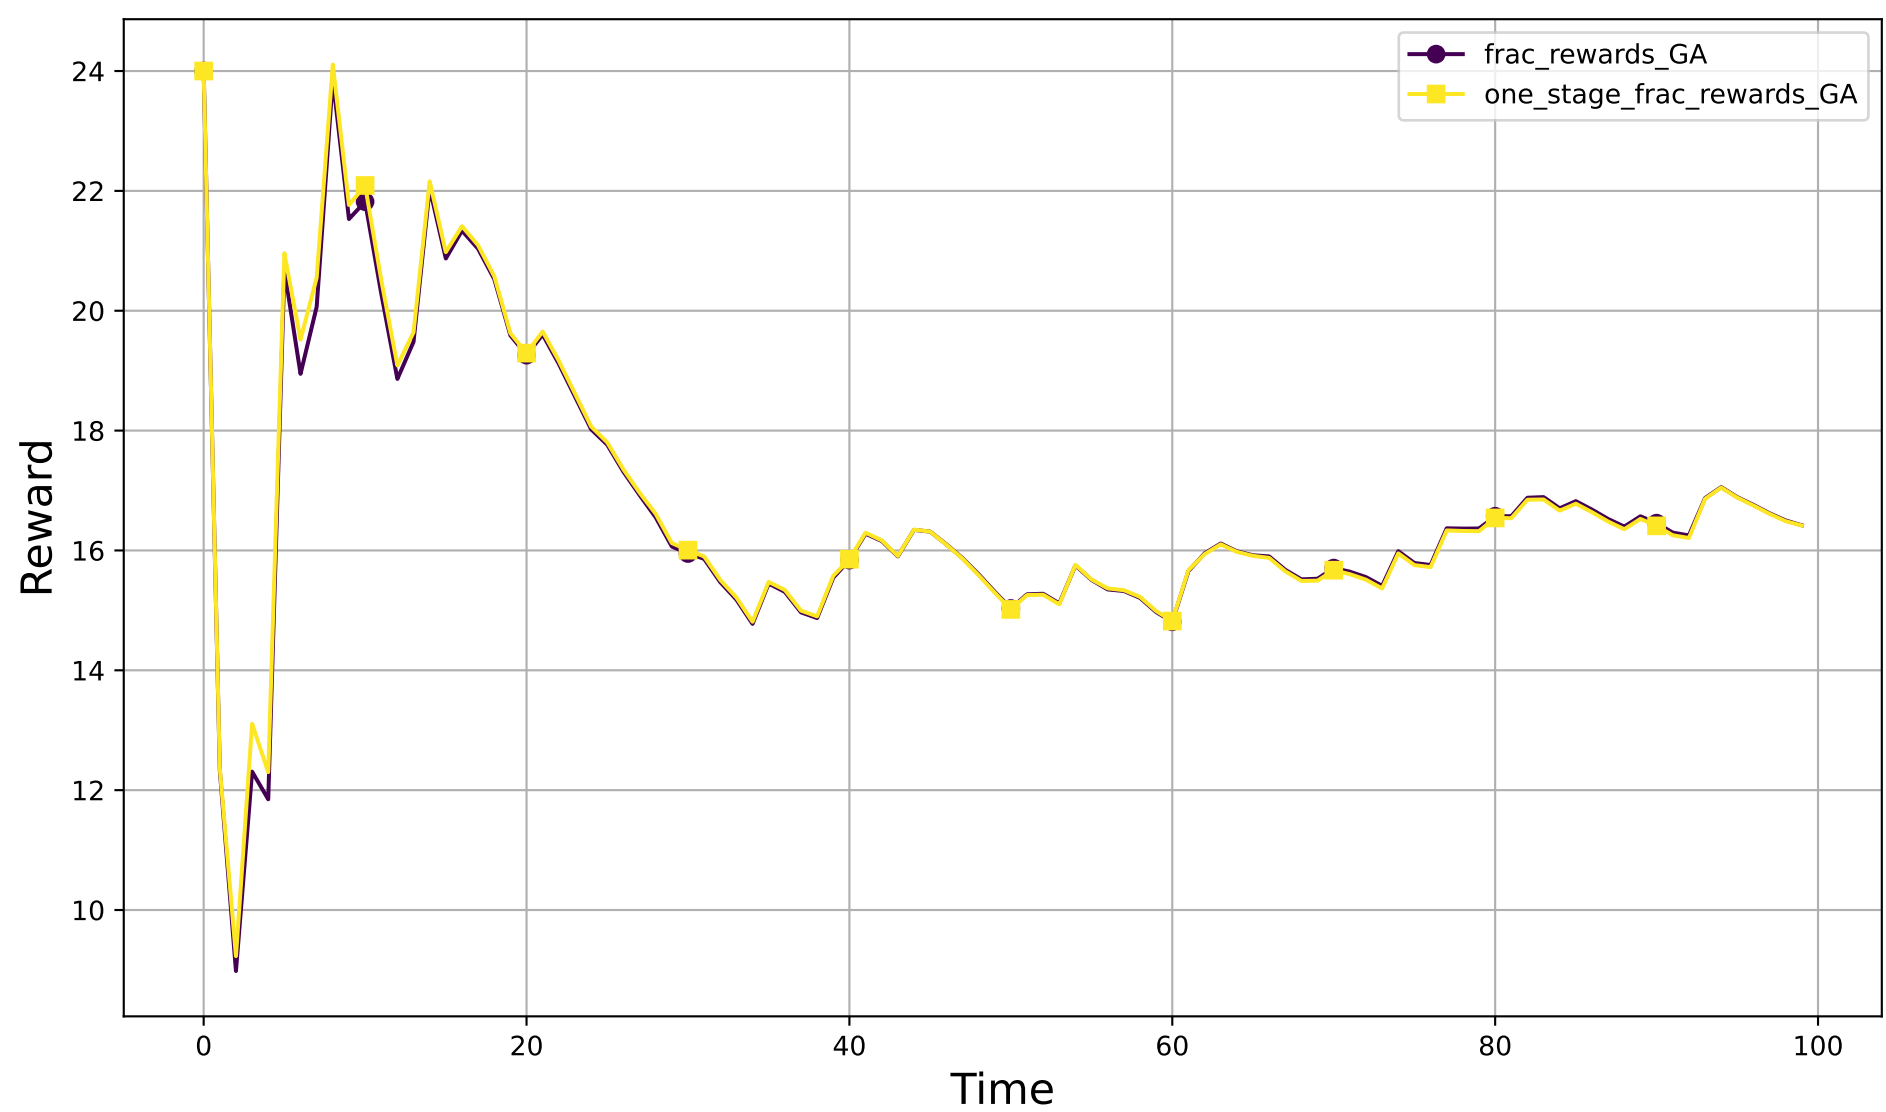

Supplement: Supplementary file 82 [file rewards_k6.pdf › online-two-stage-sub-max-main/online-two-stage-sub-max-experiments/plots/analysis/wikipedia/rewards_k6.pdf]

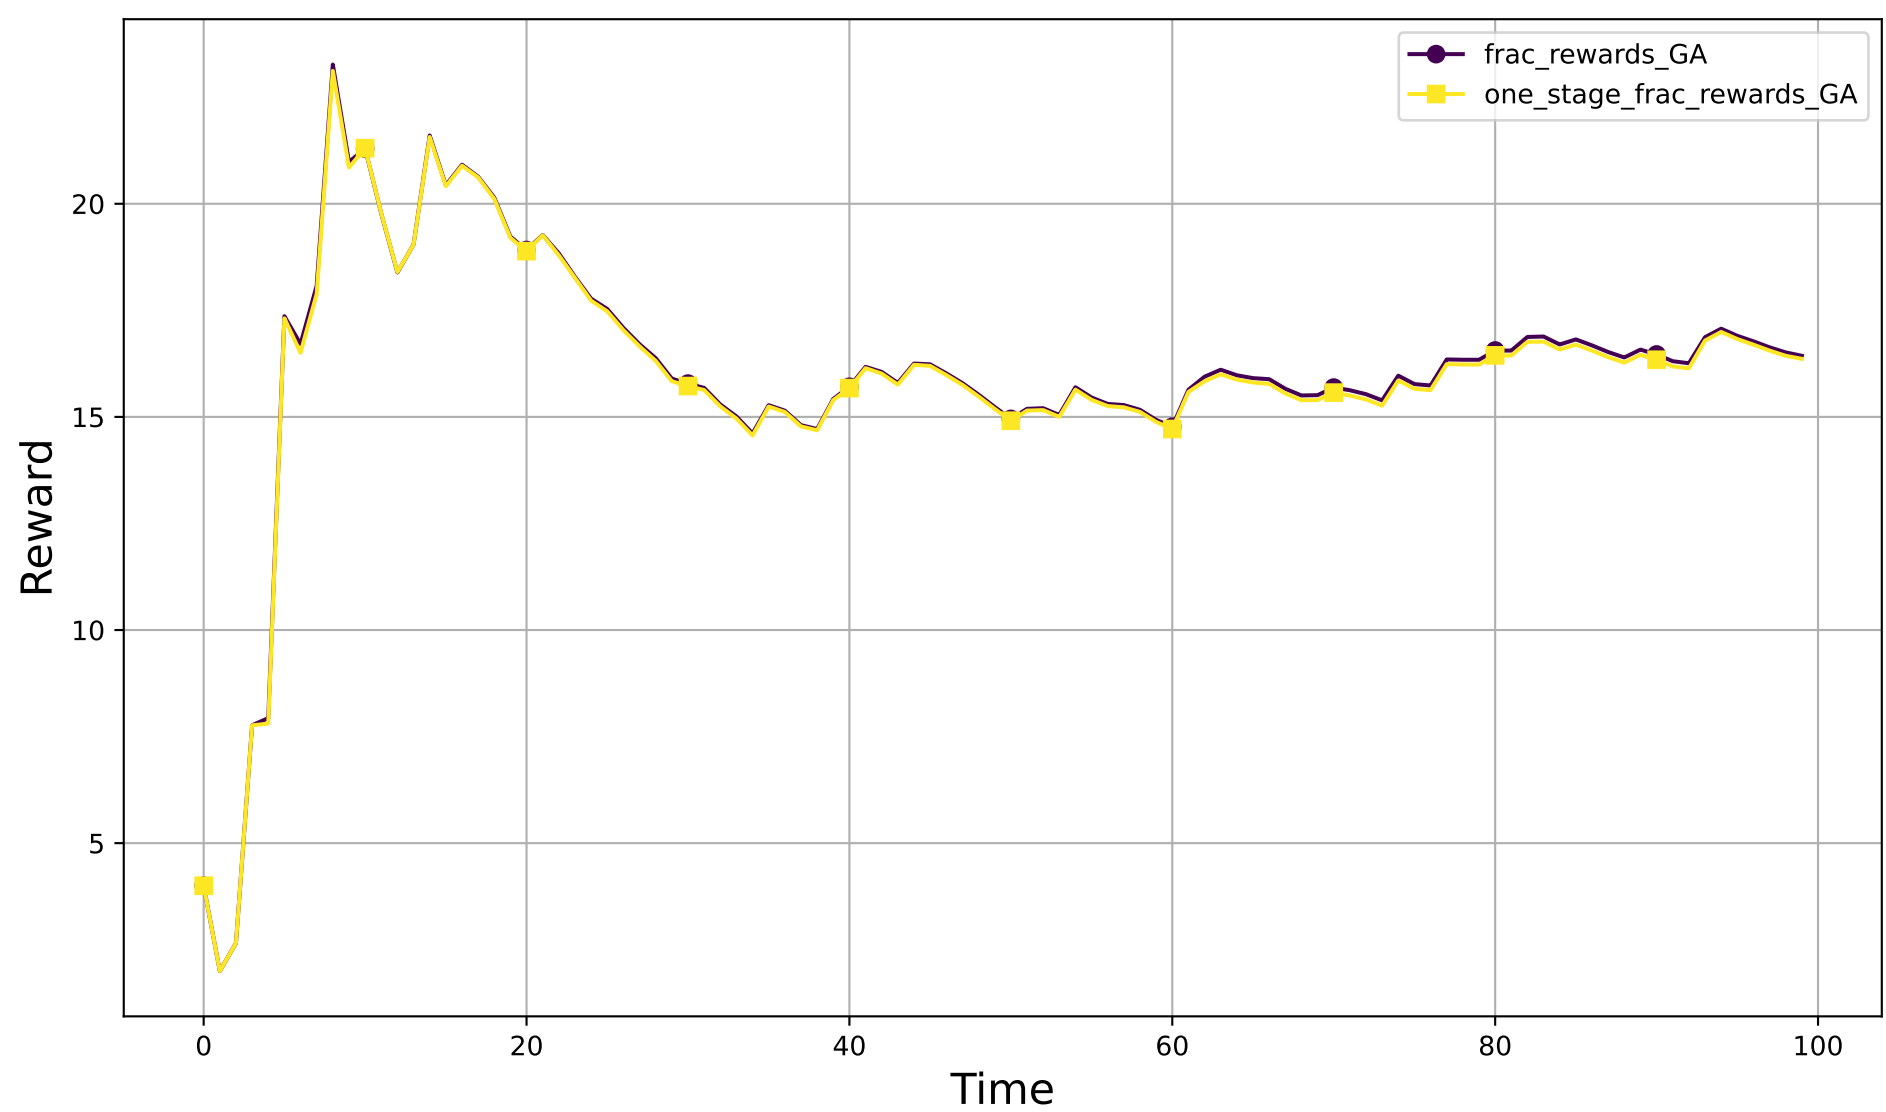

Supplement: Supplementary file 83 [file rewards_k7.pdf › online-two-stage-sub-max-main/online-two-stage-sub-max-experiments/plots/analysis/wikipedia/rewards_k7.pdf]

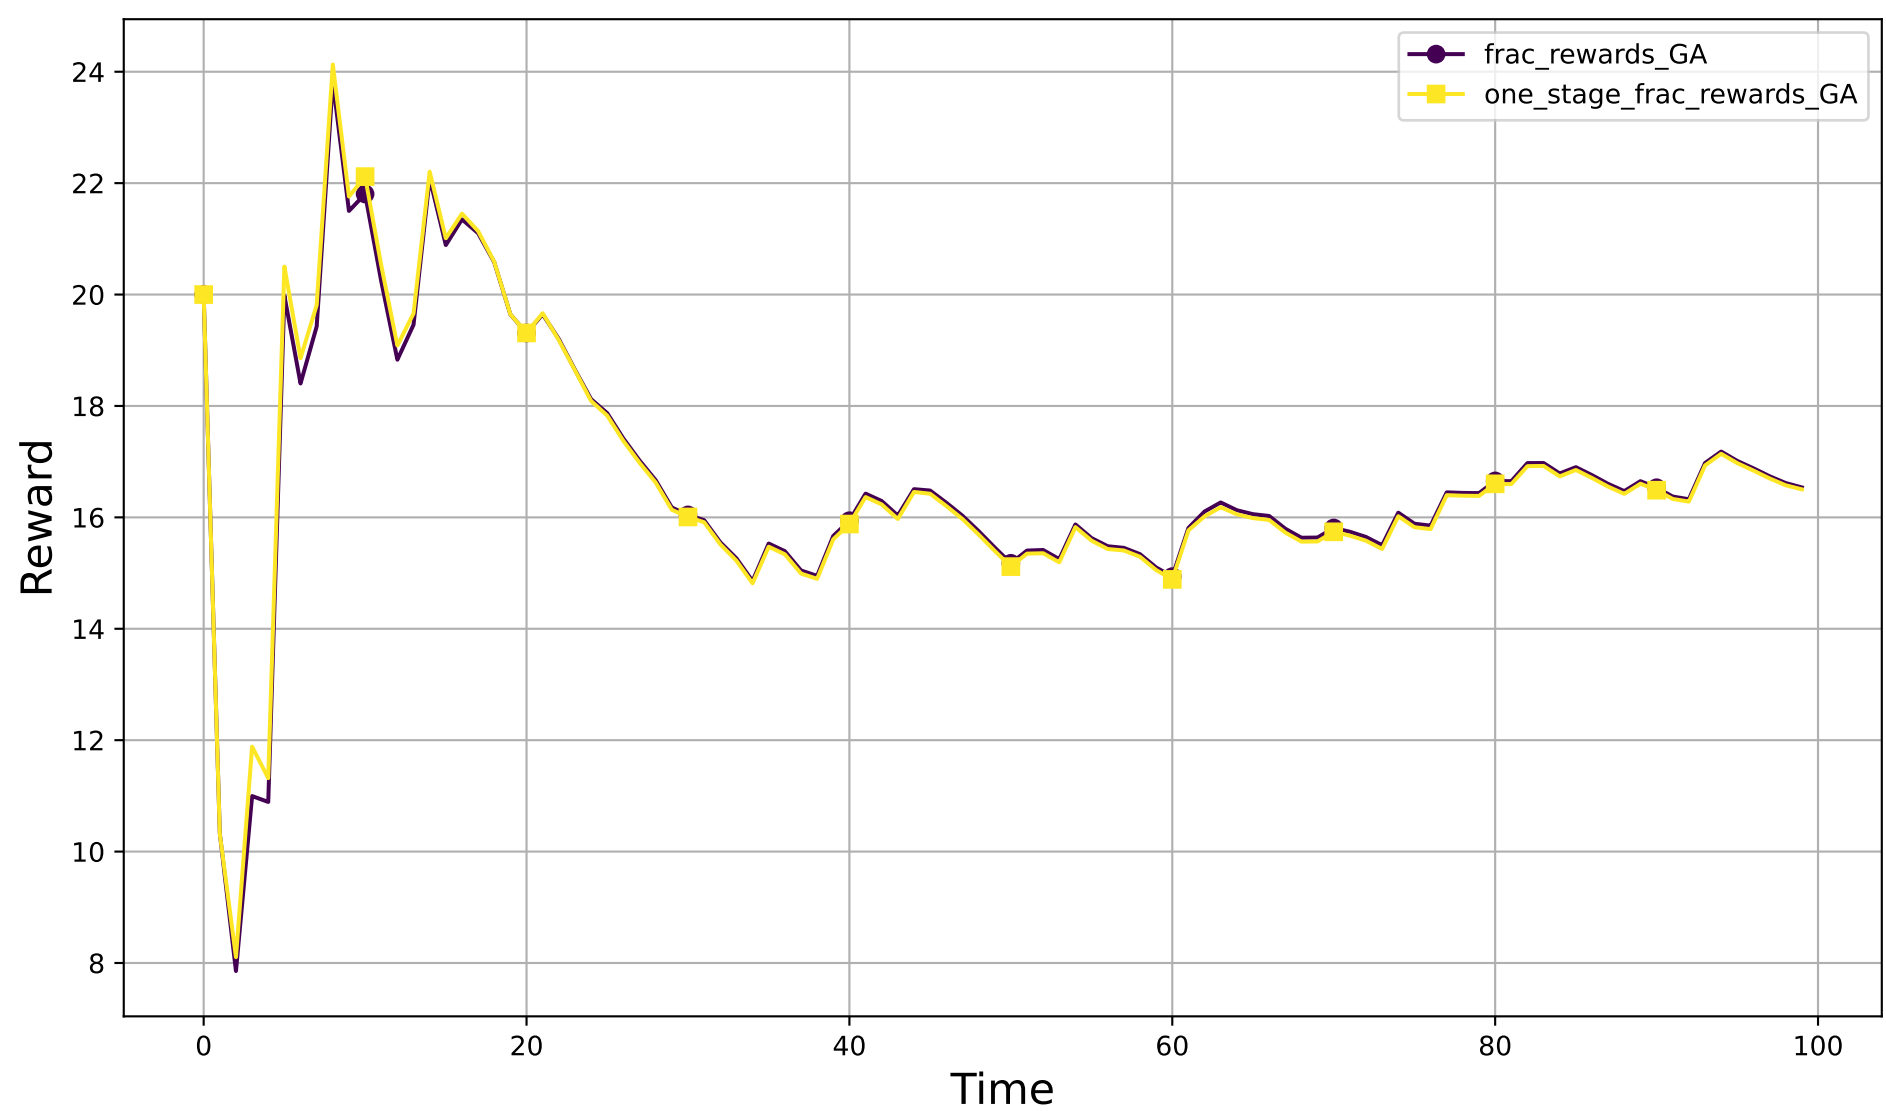

Supplement: Supplementary file 84 [file rewards_k8.pdf › online-two-stage-sub-max-main/online-two-stage-sub-max-experiments/plots/analysis/wikipedia/rewards_k8.pdf]

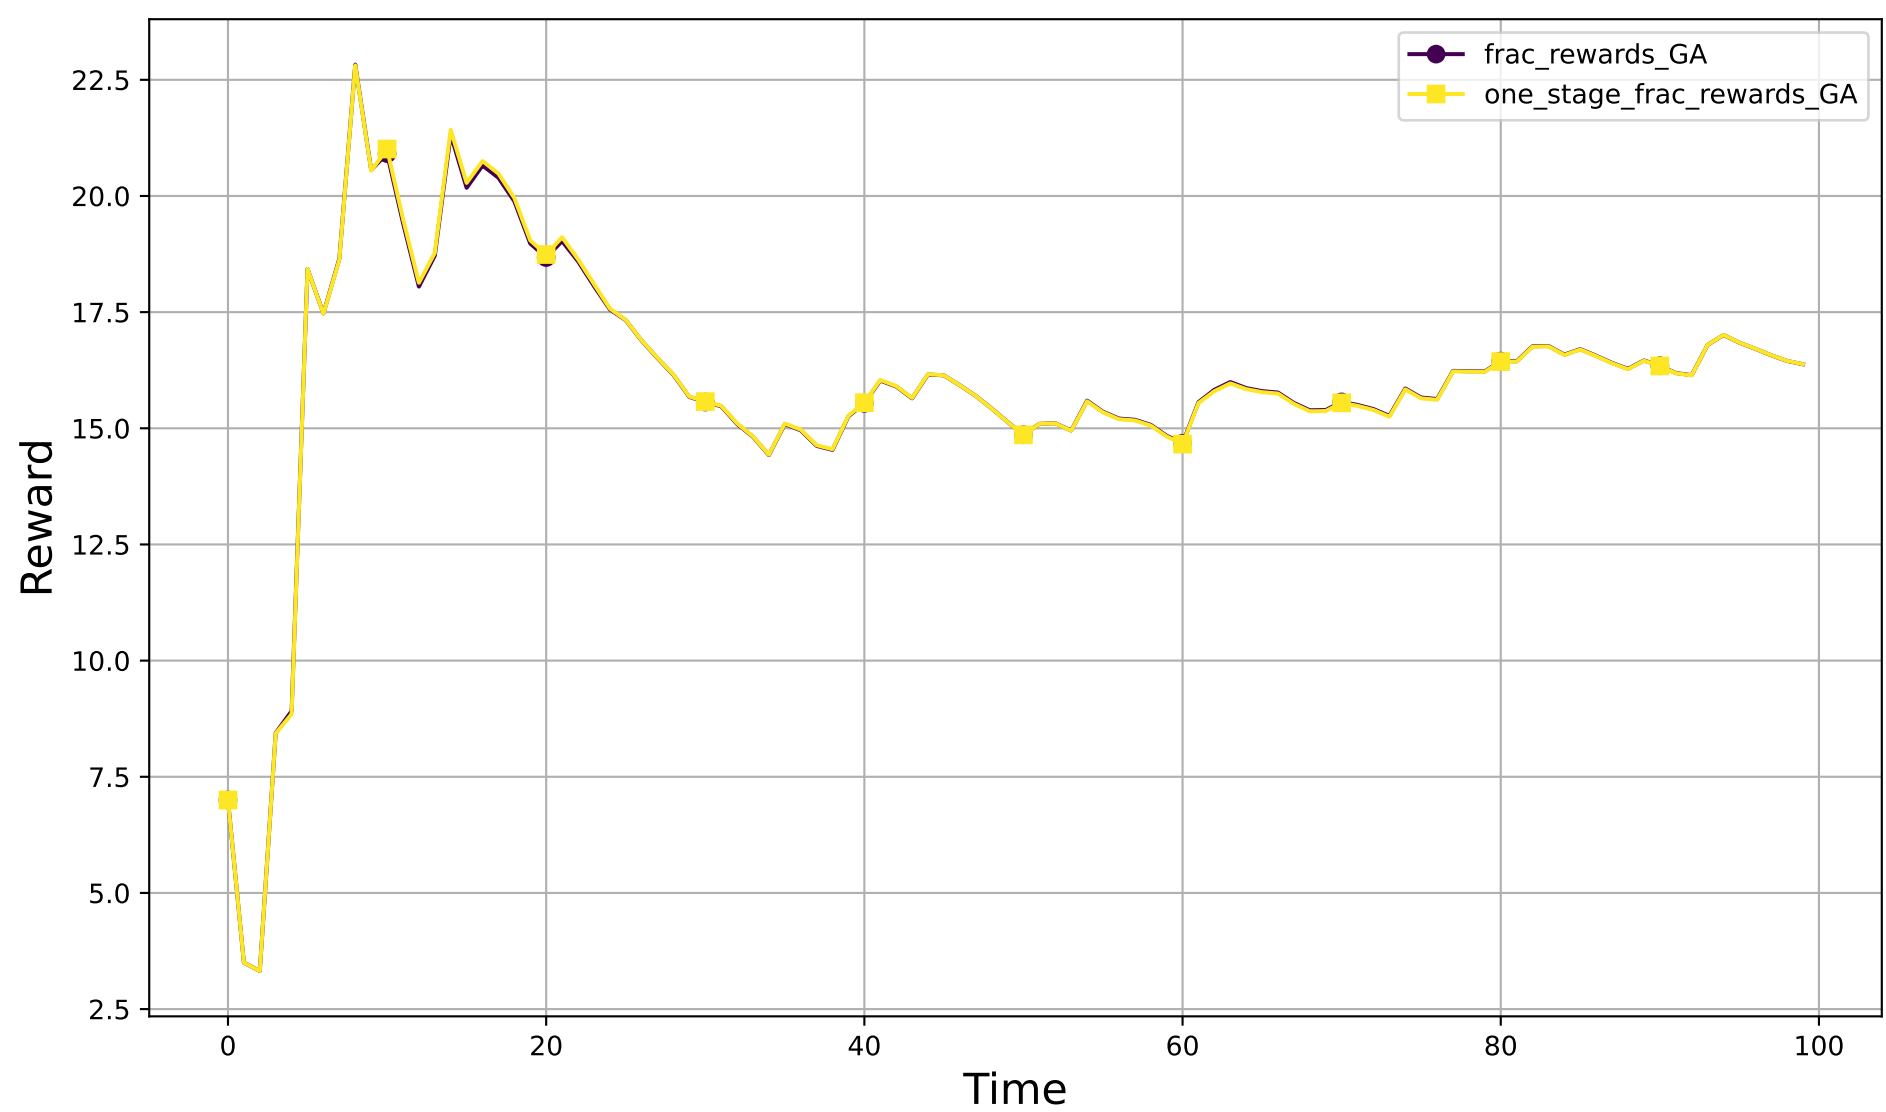

Supplement: Supplementary file 85 [file rewards_k9.pdf › online-two-stage-sub-max-main/online-two-stage-sub-max-experiments/plots/analysis/wikipedia/rewards_k9.pdf]

Distribution of Potential Weights

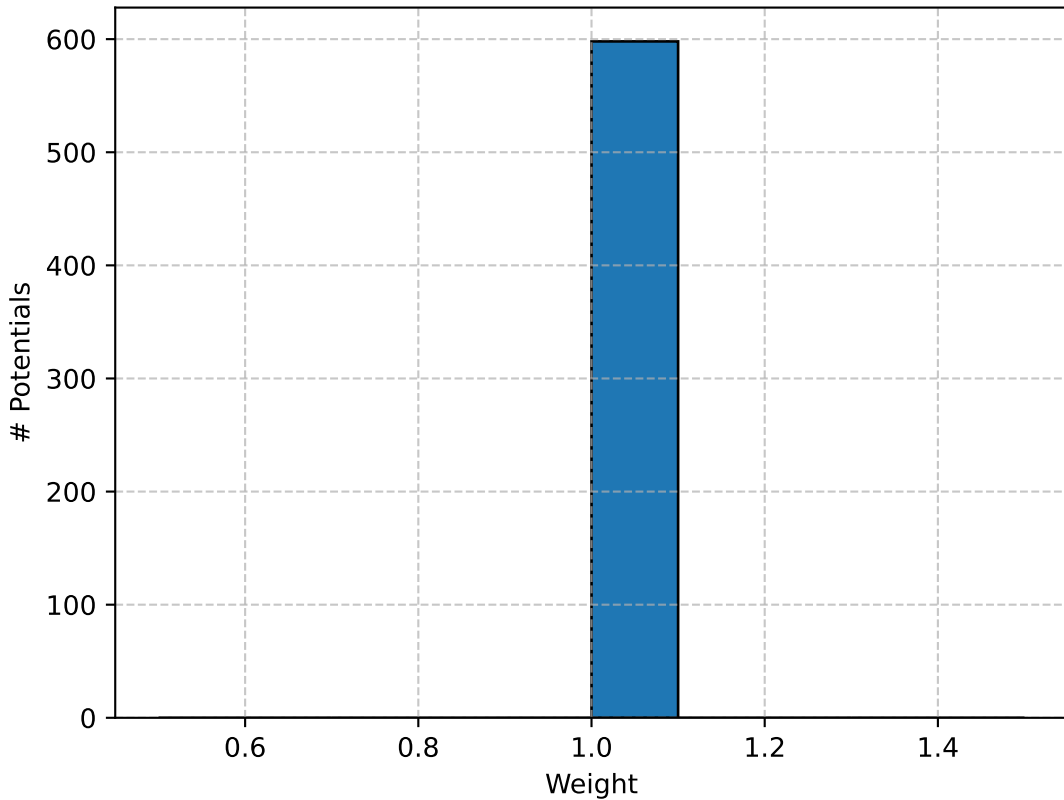

Supplement: Supplementary file 86 [file wtp_weights_dist.pdf › online-two-stage-sub-max-main/online-two-stage-sub-max-experiments/plots/analysis/wikipedia/wtp_weights_dist.pdf]

Distribution of Potential Weights



Supplement: Supplementary file 87 [file wtp_weights_dist_wikipedia.pdf › online-two-stage-sub-max-main/online-two-stage-sub-max-experiments/plots/analysis/wikipedia/wtp_weights_dist_wikipedia.pdf]

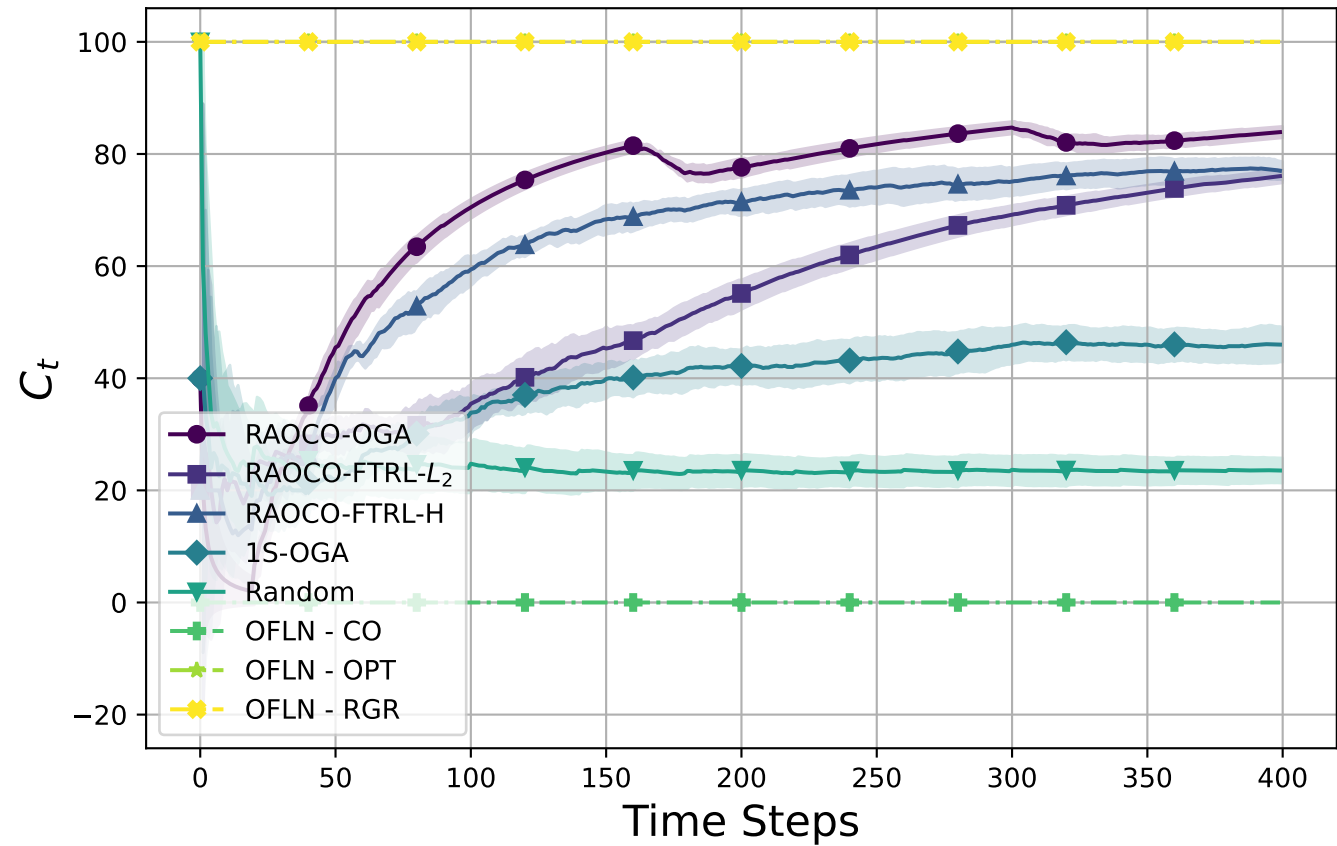

Supplement: Supplementary file 88 [file coverage.pdf › online-two-stage-sub-max-main/online-two-stage-sub-max-experiments/plots/coverage.pdf]

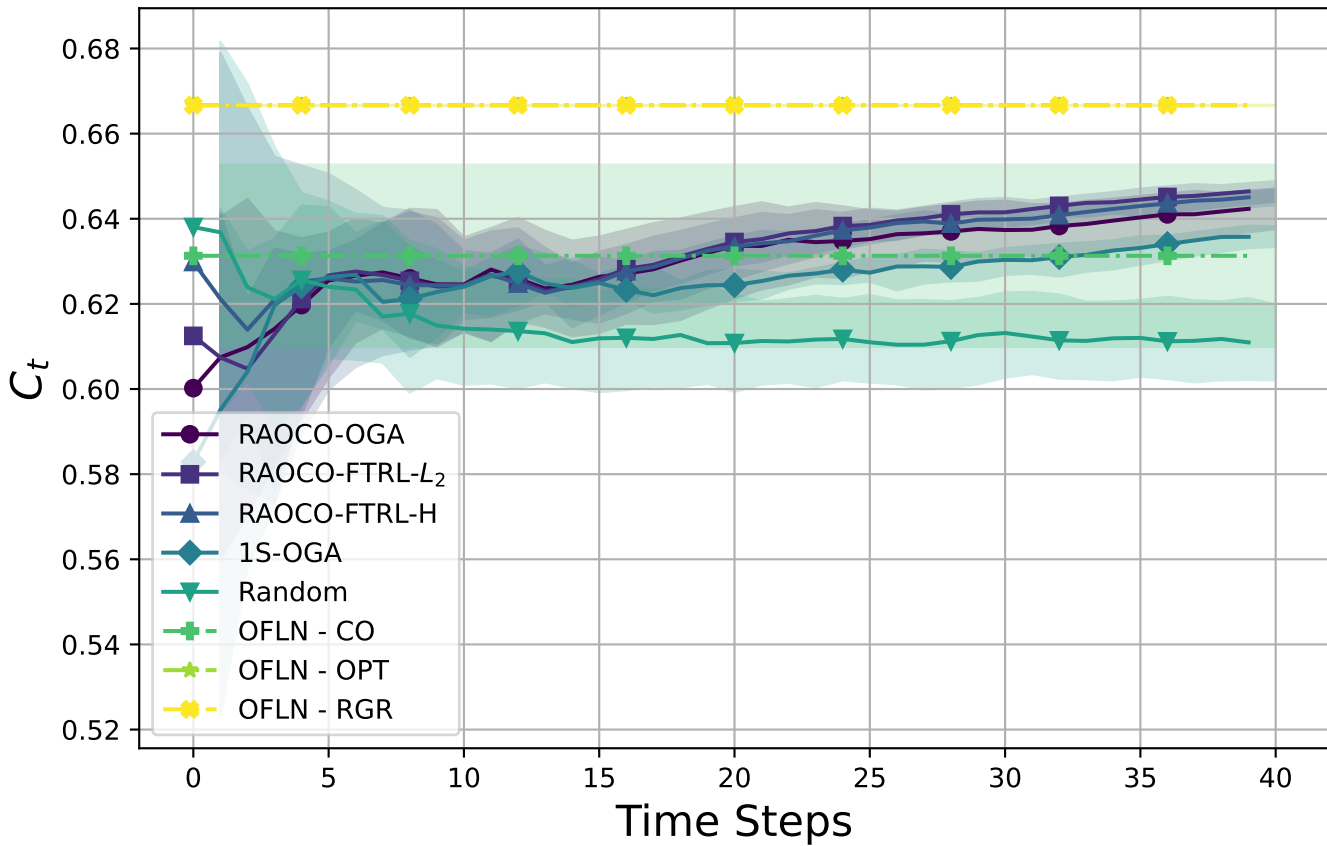

Supplement: Supplementary file 89 [file images.pdf › online-two-stage-sub-max-main/online-two-stage-sub-max-experiments/plots/images.pdf]

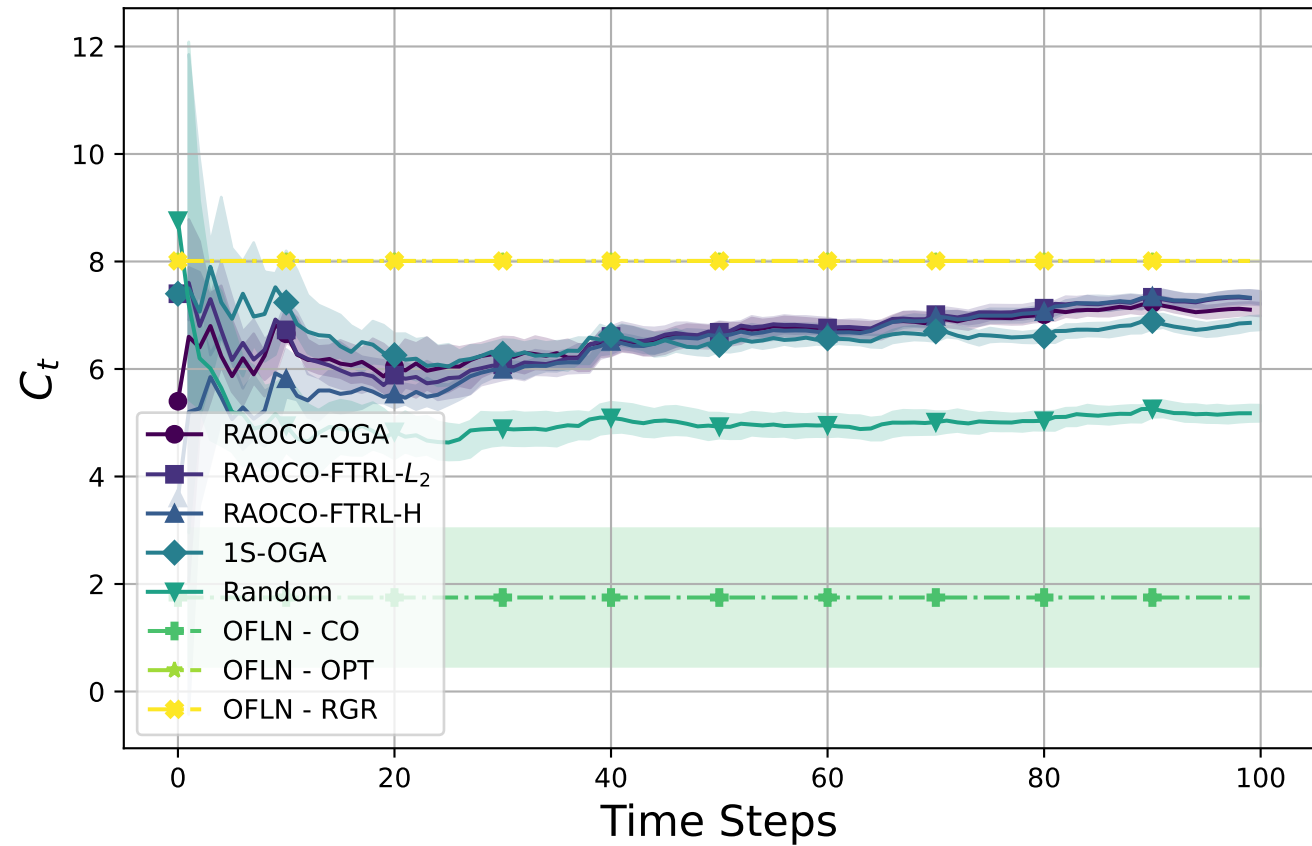

Supplement: Supplementary file 90 [file influence.pdf › online-two-stage-sub-max-main/online-two-stage-sub-max-experiments/plots/influence.pdf]

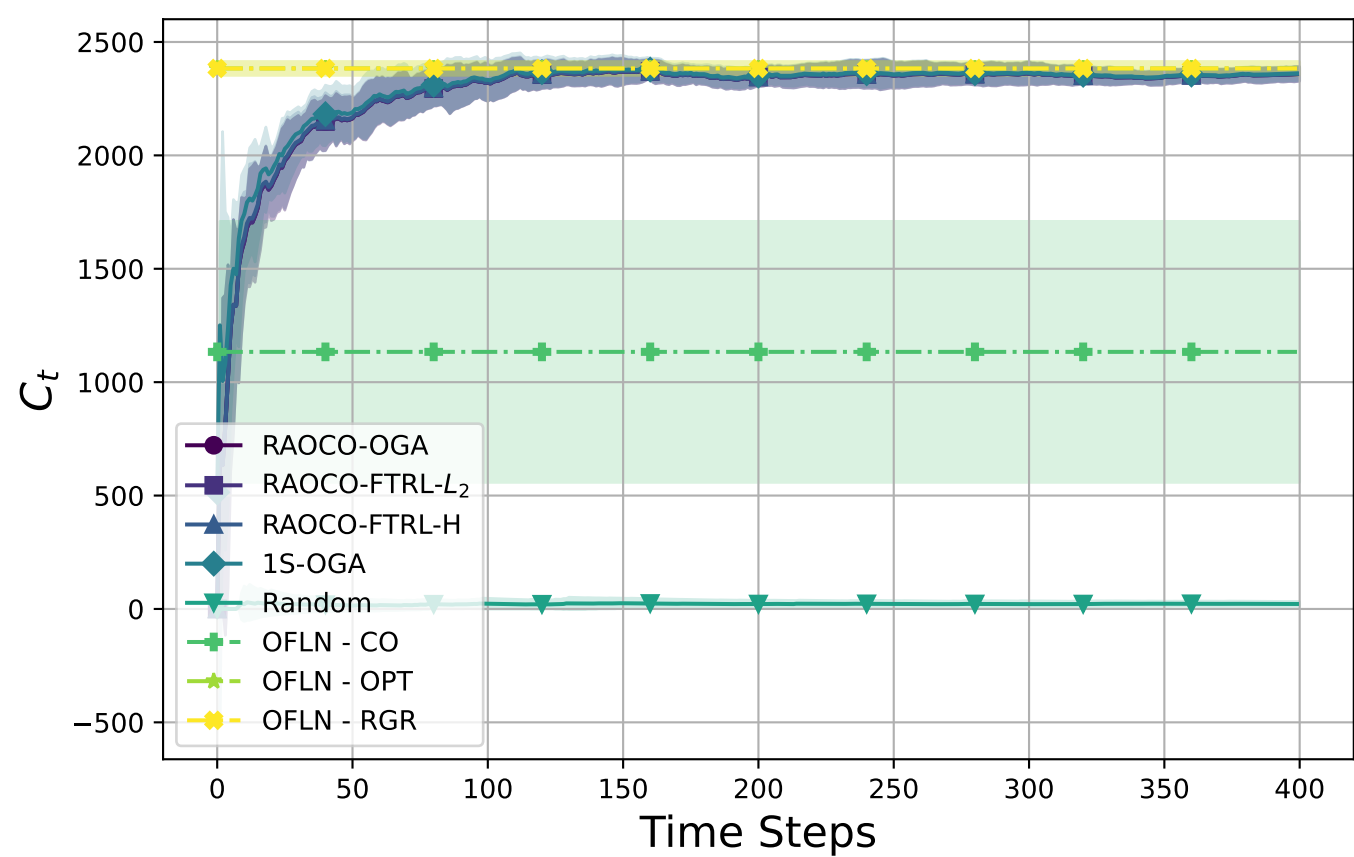

Supplement: Supplementary file 91 [file movies.pdf › online-two-stage-sub-max-main/online-two-stage-sub-max-experiments/plots/movies.pdf]

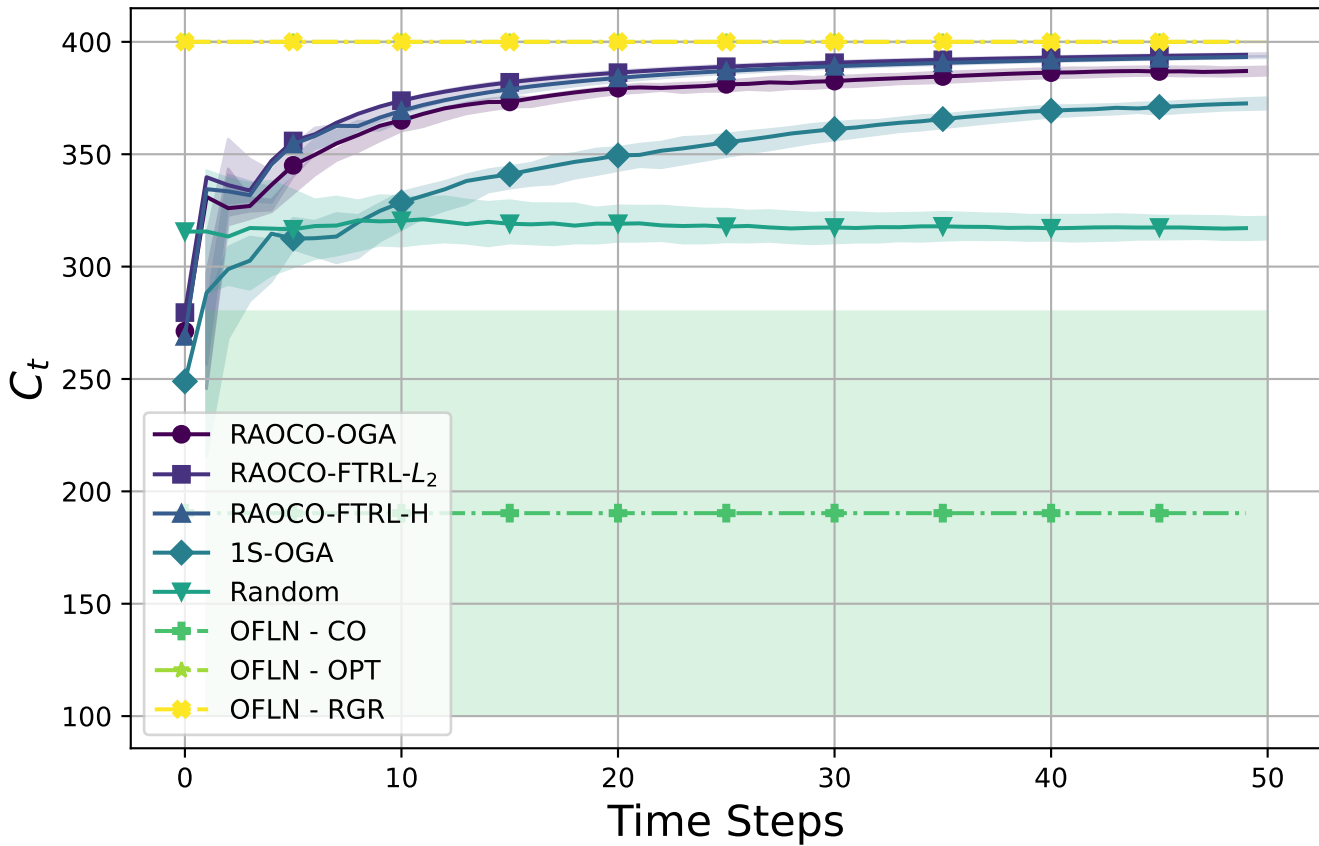

Supplement: Supplementary file 92 [file teamformation.pdf › online-two-stage-sub-max-main/online-two-stage-sub-max-experiments/plots/teamformation.pdf]

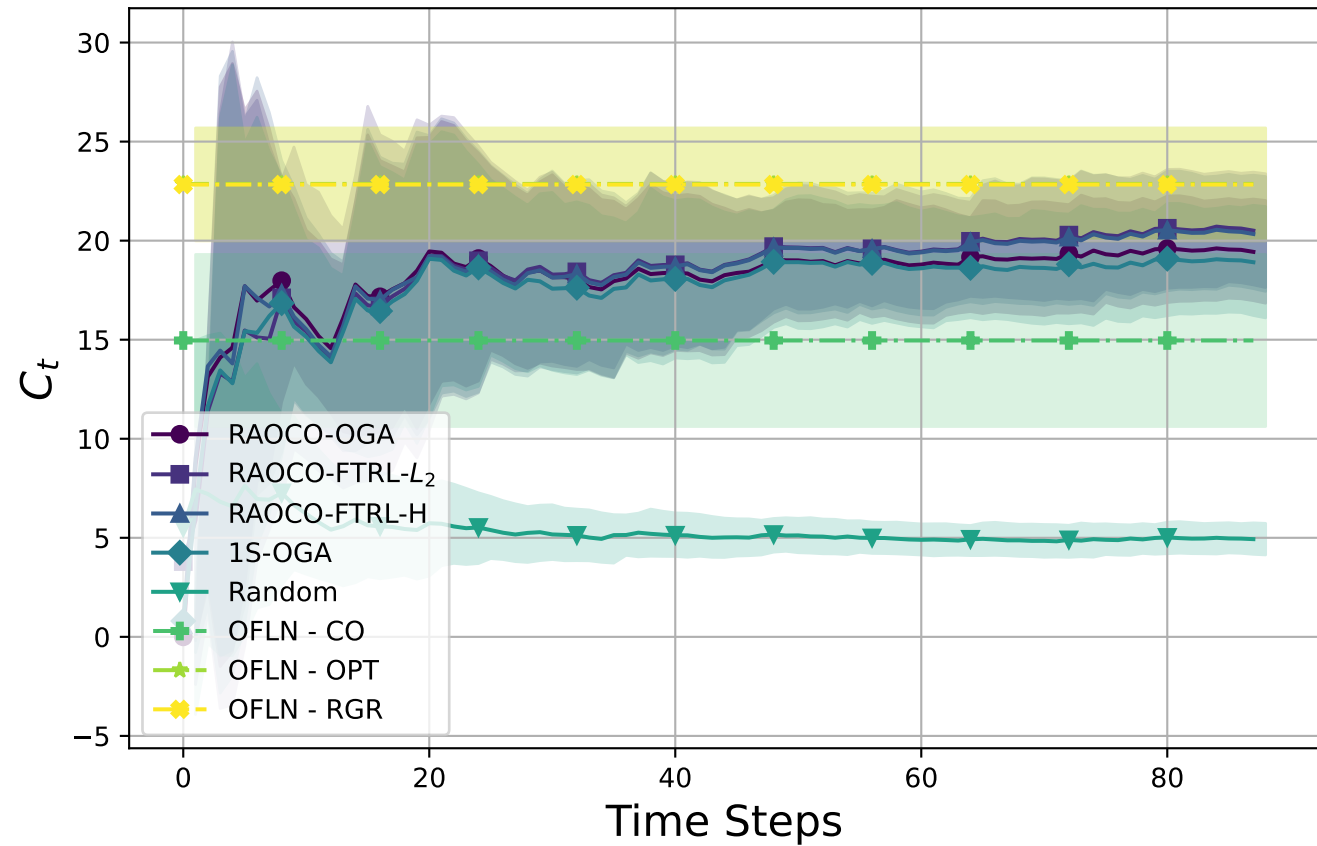

Supplement: Supplementary file 93 [file wikipedia.pdf › online-two-stage-sub-max-main/online-two-stage-sub-max-experiments/plots/wikipedia.pdf]
